# Supplementary material for: Suppression of cell migration is promoted by miR-944 through targeting of SIAH1 and PTP4A1 in breast cancer cells
Source: PubMed Central journal article supplement (PMC4932667; doi:10.1186/s12885-016-2470-3), 2016-07-04
Supplement: 12885_2016_2470_MOESM3_ESM.pdf [file 12885_2016_2470_MOESM3_ESM.pdf]

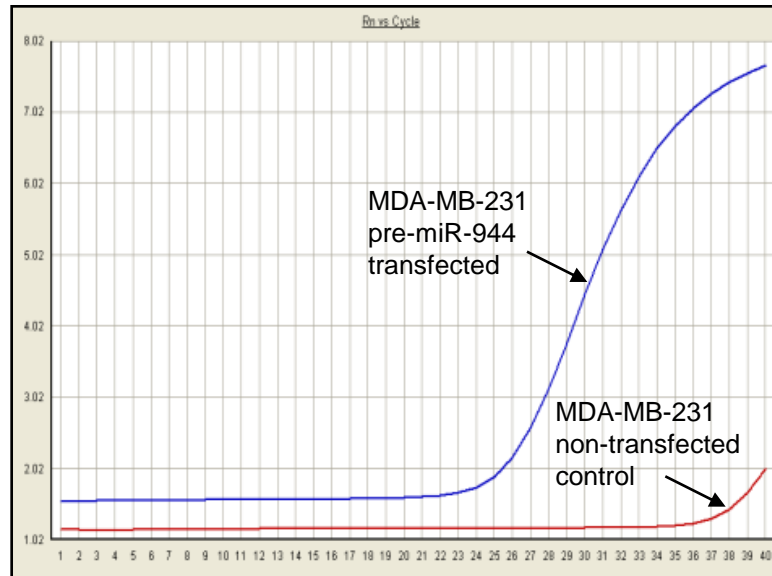

Additional file 3. Taqman microRNA assay for miR-944 expression in MDA-MB-231 breast cancer cell line.
