# Supplementary material for: Suppression of cell migration is promoted by miR-944 through targeting of SIAH1 and PTP4A1 in breast cancer cells
Source: BMC Cancer. 2016 Jul 4;16:379. doi: 10.1186/s12885-016-2470-3 (PMC4932667; doi:10.1186/s12885-016-2470-3)
Supplement: Additional file 4: — Raw data obtained from gene expression studies using DNA microarrays. (XLS 2.36 mb) [file 12885_2016_2470_MOESM4_ESM.xls]

## Sheet: Cesar_Lopez2 (1)
Flags	Index	Name	ID	F635 Mean	B635 Median	F532 Mean	B532 Mean	F532 Mean - B532	F635 Median - B635	Ratio1	If_Bckgnd_532	If_Bckgnd_635	VRatio
0	9413	C1orf32	hHC005259	72	56	779	443	371	10	0.0924262	1	0	-3.43555
0	30512	KRT4	hHC022916	71	50	768	496	288	17	0.0924479	1	0	-3.43522
0	26286	GABPA	hHC028195	62	49	670	396	278	7	0.0925373	1	0	-3.43382
0	30639	C21orf12	hHR020216	67	49	724	338	396	11	0.0925414	1	0	-3.43376
0	38200	LOC92312	hHC016894	65	56	700	465	270	7	0.0928571	1	0	-3.42884
0	30394	SH2D1B	hHC007388	46	43	494	278	221	3	0.0931174	1	0	-3.42481
0	19150	NEBL	hHA038057	58	59	622	321	326	-5	0.0932476	1	0	-3.42279
0	29528	LOC440981	hHR002684	45	44	482	308	179	-1	0.093361	1	0	-3.42104
0	29674	DUSP4	hHA037724	45	41	481	303	181	0	0.0935551	1	0	-3.41804
0	30833	C10orf6	hHA037592	67	56	715	473	244	10	0.0937063	1	0	-3.41571
0	27334	OR8H3	hHR028075	54	56	576	311	270	-5	0.09375	1	0	-3.41504
0	23743	SCIN	hHC004734	55	56	586	340	258	-3	0.0938567	1	0	-3.4134
0	91	HIST1H2BC	hHC031657	68	46	723	253	482	17	0.0940526	1	0	-3.41039
0	26507	NEK1	hHC003127	81	51	861	388	534	8	0.0940767	1	1	-3.41002
0	34237	LOC441385	hHR007185	83	54	882	648	240	25	0.0941043	0	1	-3.4096
0	31148	IK	hHC031940	382	50	4053	458	3615	146	0.0942512	1	1	-3.40735
0	21642	SPAST	hHC004698	102	47	1082	370	742	13	0.0942699	1	1	-3.40706
0	17963	ZFP95	hHC015797	70	63	742	483	277	0	0.0943396	1	0	-3.40599
0	26707	ADCY1	hHC008119	69	54	729	463	269	15	0.0946502	1	0	-3.40125
0	34693	SCGB1D2	hHC025881	57	53	601	312	315	3	0.0948419	1	0	-3.39833
0	31264	FEM1A	hHR029060	789	50	8308	621	7807	156	0.0949687	1	1	-3.3964
0	30361	MORF4L1	hCX048464	50	46	526	343	195	0	0.095057	1	0	-3.39506
0	50147	IL6ST	hHR009804	64	56	673	187	496	-3	0.0950966	1	0	-3.39446
0	26801	DDX26	hHC029911	55	50	578	375	215	1	0.0951557	1	0	-3.39357
0	31987	BTN2A1	hHA039872	63	57	661	408	280	3	0.0953101	1	0	-3.39123
0	31287	LOC389031	hHR020600	81	53	849	336	522	13	0.0954064	1	1	-3.38977
0	29736	MTL5	hHC002300	44	41	461	283	180	0	0.0954447	1	0	-3.38919
0	23718	LOC441264	hHR030378	60	56	628	356	296	0	0.0955414	1	0	-3.38773
0	29765	TAGAP	hHC004112	45	43	470	300	177	0	0.0957447	1	0	-3.38466
0	30061	C9orf102	hHC010256	47	43	489	202	306	1	0.0961145	1	0	-3.3791
0	27248	LOC402598	hHR007555	53	50	551	357	198	-4	0.0961887	1	0	-3.37799
0	31427	LOC283902	hHR011576	74	54	769	325	466	19	0.0962289	1	0	-3.37739
0	29794	DSCR4	hHC016604	45	43	467	303	171	0	0.0963597	1	0	-3.37543
0	30489	OR4C12	hHR028376	53	46	548	365	195	0	0.0967153	1	0	-3.37011
0	25385	DCHS1	hHC020047	45	44	463	278	190	-1	0.0971922	1	0	-3.36302
0	29642	SLC16A10	hHC005468	42	41	432	255	179	-1	0.0972222	1	0	-3.36257
0	29524	C18orf26	hHC002492	44	43	452	286	174	0	0.0973451	1	0	-3.36075
0	18329	INVS	hHC004565	78	51	799	553	261	25	0.097622	0	1	-3.35665
0	12603	TBP	hCP000172	66	46	675	315	425	18	0.0977778	1	0	-3.35435
0	8785	LOC441740	hHR028491	49	53	501	332	164	-7	0.0978044	1	0	-3.35396
0	15696	DIO3	hHC007432	57	54	582	346	264	0	0.0979381	1	0	-3.35199
0	21903	TFCP2	hHA032622	48	41	490	285	209	3	0.0979592	1	0	-3.35168
0	17277	C17orf69	hHC004493	59	46	602	283	364	1	0.0980066	1	0	-3.35098
0	31461	TMEM71	hHC005144	73	56	744	310	466	14	0.0981183	1	0	-3.34933
0	10241	CNOT8	hHC024531	58	54	591	377	229	2	0.0981387	1	0	-3.34903
0	30528	CLCN7	hHC019844	85	51	866	557	343	30	0.0981524	1	1	-3.34883
0	22427	KIAA1429	hHA037302	54	53	550	365	188	-2	0.0981818	1	0	-3.3484
0	33788	EMR2	hHC020157	1797	46	18298	306	18088	103	0.0982075	1	1	-3.34802
0	31315	DHX9	hHA033080	50	53	509	325	199	-3	0.0982318	1	0	-3.34767
0	43005	RN7SK	hHR030227	87	56	885	631	334	20	0.0983051	0	1	-3.34659
0	27366	TTN	hHA035371	53	50	539	238	331	0	0.0983302	1	0	-3.34622
0	31289	MBL1P1	hHR020696	71	59	721	466	269	10	0.0984743	1	0	-3.34411
0	29731	SGPP2	hHC002096	43	41	436	258	185	-1	0.0986239	1	0	-3.34192
0	29654	CHKB	hHA038300	44	44	446	258	194	0	0.0986547	1	0	-3.34147
0	23712	DCLRE1B	hHA034314	62	59	628	400	242	1	0.0987261	1	0	-3.34042
0	34690	STK16	hHC028389	87	60	881	536	368	24	0.0987514	1	0	-3.34005
0	19784	OTOA	hHA036617	57	56	577	360	232	-5	0.0987868	1	0	-3.33954
0	23858	HBB	hHC006762	53	51	536	308	240	2	0.0988806	1	0	-3.33817
0	10295	FLJ46385	hHR007923	91	53	917	563	506	31	0.0992366	1	1	-3.33298
0	35223	SFTPA1	hCT000633	102	74	1027	677	384	27	0.0993184	1	0	-3.3318
0	18936	ANP32F	hHR028169	61	56	614	348	287	3	0.0993485	1	0	-3.33136
0	23318	FLJ42486	hHC014634	54	54	543	353	191	-3	0.0994475	1	0	-3.32992
0	37952	SLC45A4	hHC027646	72	60	722	388	334	9	0.099723	1	0	-3.32593
0	31463	HAS1	hHC005240	59	56	591	328	269	-2	0.0998308	1	0	-3.32437
0	46516	HMGCR	hCT001344	66	53	661	388	291	-6	0.0998487	1	0	-3.32411
0	31426	C21orf51	hHC019556	71	56	710	311	422	13	0.1	1	0	-3.32193
0	4746	TRY6	hHR029654	67	46	668	305	373	10	0.100299	1	0	-3.31762
0	12755	LOC283320	hHR026284	55	47	548	220	355	7	0.100365	1	0	-3.31667
0	29708	SRL	hHR012092	45	44	447	288	162	-1	0.100671	1	0	-3.31228
0	31409	LOC441952	hHR013400	58	56	576	373	219	0	0.100694	1	0	-3.31194
0	31460	FLJ14803	hHC005060	72	56	712	346	400	14	0.101124	1	0	-3.30581
0	31313	TPM3	hHA034136	49	50	484	302	196	-4	0.10124	1	0	-3.30415
0	19172	GNL3L	hHR018377	80	64	790	523	277	13	0.101266	1	0	-3.30378
0	29672	EFCAB2	hHC018428	47	43	462	275	194	1	0.101732	1	0	-3.29716
0	27487	CRKL	hHC020095	69	56	678	393	322	10	0.10177	1	0	-3.29662
0	34088	ILF3	hHA039933	85	67	832	500	324	13	0.102163	1	0	-3.29105
0	29492	PRB1	hHC031676	51	44	499	276	232	2	0.102204	1	0	-3.29047
0	14576	PHC2	hHA038656	73	56	714	436	308	14	0.102241	1	0	-3.28996
0	31227	LOC392459	hHR017336	69	56	673	391	305	10	0.102526	1	0	-3.28594
0	31651	FSHB	hHC027584	70	56	682	337	362	10	0.102639	1	0	-3.28434
0	29646	LOC51057	hHC005660	46	40	448	285	167	6	0.102679	1	0	-3.28379
0	30786	BICD1	hHC002276	53	50	516	338	188	0	0.102713	1	0	-3.28331
0	27549	NPHP1	hHA038047	58	56	564	293	278	0	0.102837	1	0	-3.28157
0	31314	FBXO22	hHA034148	51	53	495	302	202	-6	0.10303	1	0	-3.27886
0	29664	SLC1A1	hHC003452	51	46	495	281	233	4	0.10303	1	0	-3.27886
0	31465	KLHDC5	hHC005336	77	59	745	380	390	17	0.103356	1	0	-3.27431
0	26969	C8orf17	hHC009175	62	50	599	356	231	4	0.103506	1	0	-3.27222
0	781	C20orf75	hHC017545	44	46	425	246	185	-5	0.103529	1	0	-3.27189
0	17549	IVD	hHC021005	56	50	540	357	185	3	0.103704	1	0	-3.26946
0	21517	C14orf58	hHR006030	49	46	472	300	184	0	0.103814	1	0	-3.26793
0	13840	PRPS2	hHC020224	84	53	808	498	332	24	0.10396	1	1	-3.26589
0	27723	SDHA	hCM001087	58	56	557	360	229	0	0.104129	1	0	-3.26355
0	14579	C21orf52	hHR021556	84	64	806	527	289	19	0.104218	1	0	-3.26232
0	34677	SYT7	hHC016281	58	53	555	308	262	3	0.104505	1	0	-3.25836
0	21307	PCDHGA1	hHR012078	60	46	572	363	217	7	0.104895	1	0	-3.25298
0	34723	CLPS	hHC019641	68	56	648	357	297	0	0.104938	1	0	-3.25239
0	38103	RNF139	hHC010738	51	46	486	283	224	3	0.104938	1	0	-3.25239
0	26077	AMDHD2	hHC025231	53	46	505	255	259	0	0.10495	1	0	-3.25222
0	26499	GRLF1	hHA038071	55	47	524	345	181	3	0.104962	1	0	-3.25206
0	31165	LOC219688	hHR008984	73	60	695	426	288	9	0.105036	1	0	-3.25104
0	21093	DGCR6L	hHR031758	56	46	533	280	267	3	0.105066	1	0	-3.25064
0	23139	TRIOBP	hHC028350	74	60	704	438	264	13	0.105114	1	0	-3.24998
0	30755	GRID2	hHC011960	59	50	561	361	208	1	0.105169	1	0	-3.24921
0	13809	FLJ10560	hHC026452	104	51	988	483	530	53	0.105263	1	1	-3.24793
0	27090	SH3PXD2A	hHC020707	61	56	579	293	303	3	0.105354	1	0	-3.24668
0	31457	ANKRD20A1	hHR030296	55	54	520	321	203	-3	0.105769	1	0	-3.24101
0	969	OR7E47P	hHR019273	46	46	434	268	173	-3	0.105991	1	0	-3.23799
0	14251	DHX37	hHC018868	90	54	846	553	306	35	0.106383	1	1	-3.23266
0	34666	HOXD8	hHC018789	70	56	657	343	326	10	0.106545	1	0	-3.23047
0	14486	ARID5A	hHC020512	98	60	919	627	363	36	0.106638	0	1	-3.22921
0	29857	OR10J5	hHR008144	43	41	403	263	145	-1	0.1067	1	0	-3.22837
0	19724	CARD14	hHA039497	70	57	656	416	259	10	0.106707	1	0	-3.22827
0	27333	LOC401605	hHR028063	60	56	562	317	250	1	0.106762	1	0	-3.22754
0	30893	GUCA2A	hHC013976	69	51	646	408	285	15	0.106811	1	0	-3.22687
0	4344	GOT1	hHC014582	166	50	1554	598	977	113	0.106821	1	1	-3.22673
0	21552	LOC340239	hHR029946	64	46	599	343	273	13	0.106845	1	0	-3.22641
0	47195	GALNT3	hHC007476	82	60	767	508	250	20	0.10691	1	0	-3.22553
0	13921	TDRD1	hHC018388	74	46	692	443	269	-2	0.106936	1	1	-3.22517
0	27365	WDR17	hHA035359	63	51	589	243	386	9	0.106961	1	0	-3.22484
0	30816	UST	hHC004100	53	49	495	321	182	-3	0.107071	1	0	-3.22336
0	24004	DSG3	hHA032586	57	56	532	343	214	0	0.107143	1	0	-3.22239
0	582	LOC440408	hHR029461	48	46	448	291	181	0	0.107143	1	0	-3.22239
0	32282	LRRC28	hHC017516	95	69	886	490	414	20	0.107223	1	0	-3.22131
0	31129	LIN7B	hHA040280	71	51	662	436	272	15	0.107251	1	0	-3.22094
0	25848	NKRF	hHC004987	82	66	764	448	379	13	0.10733	1	0	-3.21988
0	30181	OR4C6	hHR017552	45	41	419	257	168	2	0.107399	1	0	-3.21895
0	4936	KRT6B	hHC023798	53	50	493	317	187	1	0.107505	1	0	-3.21752
0	27219	LOC203510	hHR019255	60	50	557	360	202	1	0.10772	1	0	-3.21464
0	18546	ATXN2L	hHC028001	78	51	724	500	231	25	0.107735	0	1	-3.21444
0	31431	H2AFB3	hHR011768	77	56	713	315	440	20	0.107994	1	0	-3.21097
0	31372	CDH23	hHA038468	52	51	481	310	194	-1	0.108108	1	0	-3.20945
0	422	HPRT1	hCM001045	48	46	444	278	226	0	0.108108	1	0	-3.20945
0	26954	TRN	hHR032227	50	46	462	280	205	0	0.108225	1	0	-3.20789
0	12930	CAMSAP1	hHR002008	73	47	674	465	236	20	0.108309	0	1	-3.20678
0	19545	FLJ14712	hHR004829	66	54	609	312	324	6	0.108374	1	0	-3.2059
0	29766	SLCO6A1	hHC004124	44	41	405	268	144	2	0.108642	1	0	-3.20235
0	12663	LOC151194	hHC023020	78	50	715	292	435	24	0.109091	1	1	-3.1964
0	33763	ZNF409	hHR023985	74	46	678	388	325	21	0.109145	1	1	-3.19569
0	30751	ZNF490	hHR010616	66	53	604	375	238	10	0.109272	1	0	-3.19401
0	17609	LOC440152	hHR028877	62	47	567	317	274	3	0.109347	1	0	-3.19301
0	34695	BC002942	hHC025977	83	54	759	320	446	26	0.109354	1	1	-3.19292
0	29565	FAM92B	hHC024080	63	46	576	237	368	11	0.109375	1	0	-3.19265
0	18781	RP11-410N8.4	hHR021653	44	46	401	258	193	-6	0.109726	1	0	-3.18803
0	12749	RAB5C	hHC027532	85	50	774	458	334	31	0.109819	1	1	-3.1868
0	25802	AIP	hHC018907	64	46	582	293	295	10	0.109966	1	0	-3.18488
0	25907	MGC4473	hHR012463	309	43	2801	327	2489	13	0.110318	1	1	-3.18026
0	27518	LOC388622	hHR014635	62	53	562	243	346	7	0.11032	1	0	-3.18023
0	13157	UBAP2	hHC022540	82	50	743	553	200	27	0.110363	0	1	-3.17967
0	31113	MAML2	hHC010328	59	50	534	342	198	4	0.110487	1	0	-3.17805
0	38224	OCRL	hCT001150	59	51	534	265	316	5	0.110487	1	0	-3.17805
0	29641	CCT6B	hHC005456	49	41	443	212	248	5	0.110609	1	0	-3.17645
0	25677	RP3-366L4.2	hHC004495	97	50	876	633	250	46	0.110731	0	1	-3.17487
0	23142	PBX1	hHC025770	81	60	731	456	279	16	0.110807	1	0	-3.17388
0	998	ITSN2	hHC007573	54	44	487	262	229	6	0.110883	1	0	-3.17289
0	42541	LAT	hHC025619	65	50	586	386	230	7	0.110922	1	0	-3.17239
0	31403	PGC	hHC013112	68	63	612	407	225	1	0.111111	1	0	-3.16993
0	30720	ST8SIA5	hHC018308	70	56	630	397	320	7	0.111111	1	0	-3.16993
0	27253	FLJ42291	hHC030103	48	46	431	281	160	0	0.111369	1	0	-3.16658
0	29823	SDHA	hCM001136	46	44	413	272	147	-3	0.11138	1	0	-3.16644
0	46239	LOC440483	hHR028404	90	54	807	731	131	-4	0.111524	0	1	-3.16457
0	19870	LOC147646	hHR019241	78	59	698	448	252	17	0.111748	1	0	-3.16168
0	30993	C1orf113	hHC025688	89	56	796	288	516	20	0.111809	1	1	-3.16089
0	27091	ZNF516	hHR007735	76	47	677	473	211	26	0.11226	0	1	-3.15508
0	4591	LOC401904	hHR028778	902	46	8026	195	7834	633	0.112385	1	1	-3.15348
0	34676	DKFZp434O0320	hHR016197	59	54	523	252	282	-1	0.112811	1	0	-3.14802
0	31218	PEX1	hHC001892	136	50	1205	338	885	83	0.112863	1	1	-3.14735
0	26888	LOC401506	hHR007171	61	47	540	356	194	7	0.112963	1	0	-3.14608
0	25827	GAS2L3	hHC008623	80	53	708	545	182	24	0.112994	0	1	-3.14568
0	31316	PTCD2	hHA033092	63	53	557	323	245	7	0.113106	1	0	-3.14425
0	13771	LGALS8	hHR002356	82	50	724	493	283	30	0.11326	0	1	-3.14229
0	32135	LOC149448	hHC007040	94	60	829	412	441	33	0.11339	1	1	-3.14064
0	27262	LOC148490	hHR005155	57	47	502	318	170	0	0.113546	1	0	-3.13865
0	31393	TAGLN	hHC023384	54	50	475	303	172	0	0.113684	1	0	-3.1369
0	19209	ZNF306	hHC012125	89	57	782	567	220	30	0.113811	0	1	-3.13529
0	22442	LOC441539	hHR028770	60	50	526	347	190	-3	0.114068	1	0	-3.13203
0	29942	C6orf205	hHC025628	46	41	403	235	175	3	0.114144	1	0	-3.13107
0	13347	TNFRSF6B	hHC020908	91	50	797	518	489	26	0.114178	1	1	-3.13064
0	31283	LOC442649	hHR020408	53	53	464	300	173	-2	0.114224	1	0	-3.13006
0	30477	C6orf176	hHC016280	65	53	569	343	303	6	0.114236	1	0	-3.12992
0	34468	C14orf138	hHA033213	69	63	603	398	235	3	0.114428	1	0	-3.12749
0	10153	HIST2H3C	hHR032211	57	47	498	218	298	3	0.114458	1	0	-3.12711
0	29613	NAGA	hHR009488	53	46	463	286	180	5	0.114471	1	0	-3.12695
0	31454	DMRTC1	hHR030116	85	56	742	331	412	27	0.114555	1	1	-3.12588
0	27092	PGCP	hHC007747	81	51	707	447	275	25	0.114569	1	1	-3.12572
0	30519	CLYBL	hHA035576	62	49	540	355	194	7	0.114815	1	0	-3.12262
0	35045	SIAHBP1	hHC016665	86	56	748	472	293	24	0.114973	1	1	-3.12063
0	35253	EDN1	hHC018969	107	64	927	536	394	37	0.115426	1	1	-3.11496
0	19843	LOC442279	hHR023357	82	59	710	420	335	18	0.115493	1	0	-3.11412
0	23772	CSE1L	hHA035274	55	51	476	261	226	-1	0.115546	1	0	-3.11346
0	12847	C17orf41	hHC005740	58	49	501	246	293	4	0.115768	1	0	-3.11069
0	12753	PTPRCAP	hHC026188	71	46	613	348	275	4	0.115824	1	1	-3.11
0	34925	ODF2	hHA037785	92	60	793	600	216	24	0.116015	0	1	-3.10762
0	30895	PPP1R7	hHC014072	155	73	1331	962	395	83	0.116454	0	1	-3.10217
0	29705	KIF25	hHC011984	49	44	420	278	147	3	0.116667	1	0	-3.09954
0	4268	BPNT1	hHA035510	46	46	394	258	141	-2	0.116751	1	0	-3.09849
0	27220	LOC253662	hHR019267	56	49	479	318	167	5	0.11691	1	0	-3.09653
0	25981	ETV4	hHC017551	49	41	419	261	168	3	0.116945	1	0	-3.0961
0	27221	C1orf91	hHC019351	64	50	547	333	227	10	0.117002	1	0	-3.0954
0	13922	C20orf67	hHC018400	79	50	675	453	262	26	0.117037	0	1	-3.09496
0	14197	NEK2	hHC029716	78	50	665	472	217	26	0.117293	0	1	-3.09181
0	4636	HSDL2	hHC012854	160	56	1363	988	387	105	0.117388	0	1	-3.09064
0	19174	GLT8D1	hHA037673	89	59	757	548	221	28	0.117569	0	1	-3.08842
0	23770	DHX57	hHA035178	69	56	586	327	263	8	0.117747	1	0	-3.08623
0	30691	B4GALT6	hHR005432	64	49	543	355	201	7	0.117864	1	0	-3.08481
0	25712	FER1L4	hHC013819	60	46	509	277	239	5	0.117878	1	0	-3.08463
0	19514	TTN	hHA034409	56	53	475	303	198	-3	0.117895	1	0	-3.08443
0	27014	EPHA6	hHC001699	48	47	407	253	164	-6	0.117936	1	0	-3.08392
0	27582	FLRT3	hHA034603	56	54	474	303	186	-4	0.118143	1	0	-3.08139
0	21761	THEM2	hHR001614	136	66	1151	300	855	47	0.118158	1	1	-3.08121
0	30815	CLCA3	hHC004088	57	51	482	310	179	-5	0.118257	1	0	-3.08
0	14292	KIAA1505	hHC004672	85	51	718	467	275	33	0.118384	1	1	-3.07845
0	8937	C20orf38	hHC025419	57	51	481	303	186	-1	0.118503	1	0	-3.077
0	29675	WIZ	hHA037808	49	43	413	268	152	3	0.118644	1	0	-3.07529
0	23111	LOC392790	hHR018558	81	63	682	423	276	13	0.118768	1	0	-3.07378
0	30399	ZNF230	hHC007664	48	43	404	262	146	3	0.118812	1	0	-3.07325
0	29671	FLJ21125	hHR018416	53	43	445	221	229	7	0.119101	1	0	-3.06974
0	29676	PTPRC	hHA037820	49	43	411	268	148	1	0.119221	1	0	-3.06828
0	12828	RBBP4	hHC031288	140	50	1172	488	710	84	0.119454	1	1	-3.06547
0	29588	HADHA	hHR020156	80	50	669	456	218	27	0.119581	0	1	-3.06393
0	14175	TSC22D1	hHE041332	97	56	811	463	368	37	0.119605	1	1	-3.06365
0	29881	CDH23	hHA039632	42	40	351	198	168	-1	0.119658	1	0	-3.06301
0	30460	PLEKHK1	hHC018500	60	49	501	328	186	2	0.11976	1	0	-3.06178
0	30929	GLRB	hHC004568	104	56	868	498	395	41	0.119816	1	1	-3.06111
0	21872	SMARCE1	hHA033402	70	47	581	277	314	13	0.120482	1	0	-3.05311
0	12908	IL21	hHC012088	45	46	373	215	201	-3	0.120643	1	0	-3.05118
0	13958	PCDHGB6	hHR012064	84	49	696	448	268	31	0.12069	1	1	-3.05063
0	33985	LOC389246	hHR028497	97	63	802	643	184	31	0.120948	0	1	-3.04755
0	26601	ADAM28	hHA033751	88	51	727	473	262	36	0.121045	1	1	-3.04638
0	14151	PELO	hHR002932	79	56	652	425	234	21	0.121166	1	0	-3.04495
0	14512	EPB41L4B	hHA034048	91	51	751	551	235	38	0.121172	0	1	-3.04487
0	17603	LOC442718	hHR024749	103	49	850	167	693	48	0.121176	1	1	-3.04482
0	30796	HNRPK	hHA033476	97	57	800	633	198	36	0.12125	0	1	-3.04394
0	31079	PPAPDC2	hHC008696	77	53	635	220	452	13	0.12126	1	0	-3.04383
0	22753	ANAPC2	hHC032214	71	56	584	317	273	7	0.121575	1	0	-3.04008
0	29491	SSX4	hHR031664	49	43	403	255	160	3	0.121588	1	0	-3.03993
0	42151	LOC440418	hHR027635	41	46	337	198	169	-6	0.121662	1	0	-3.03905
0	33642	PTPRN	hHC025821	69	50	567	373	219	17	0.121693	1	0	-3.03868
0	31214	FLJ38159	hHC001700	71	47	583	493	108	3	0.121784	0	1	-3.0376
0	26920	ERCC8	hHA035203	95	50	780	343	452	43	0.121795	1	1	-3.03747
0	26910	AOX1	hHC010147	70	54	574	365	213	12	0.121951	1	0	-3.03562
0	25829	PAK2	hHR008719	125	51	1023	650	381	73	0.12219	1	1	-3.03281
0	27137	SFRS10	hHA036823	79	50	646	493	173	26	0.122291	0	1	-3.03161
0	25204	TBP	hCP000187	80	54	653	322	375	19	0.122511	1	0	-3.02901
0	18527	NCF4	hHA040181	82	54	669	566	161	26	0.122571	0	1	-3.02831
0	29831	RHBDF1	hHC031088	106	53	863	573	312	50	0.122827	1	1	-3.0253
0	18641	RBM19	hHC024533	81	53	658	488	181	20	0.1231	0	1	-3.02209
0	38043	PVRL3	hHR005554	78	50	633	315	375	26	0.123223	1	1	-3.02066
0	31271	KCNC2	hHA039416	80	50	648	485	182	26	0.123457	0	1	-3.01792
0	25720	TIGD6	hHC006139	41	41	332	215	126	-1	0.123494	1	0	-3.01749
0	19901	XKRY	hHR029981	76	57	615	383	244	6	0.123577	1	0	-3.01652
0	22781	ITGAL	hHC023574	86	56	694	480	221	27	0.123919	0	1	-3.01253
0	14046	SLC25A30	hHC016672	101	54	815	448	392	42	0.123926	1	1	-3.01244
0	24035	FGFR2	hHC021822	58	53	468	268	216	0	0.123932	1	0	-3.01238
0	31741	ZNF566	hHC005408	79	73	636	365	298	3	0.124214	1	0	-3.0091
0	4327	ITPR1	hHC002666	49	46	394	258	141	0	0.124365	1	0	-3.00734
0	9243	NR6A1	hHC007851	50	43	402	177	225	3	0.124378	1	0	-3.0072
0	27042	HAPLN3	hHC024547	81	50	651	335	326	26	0.124424	1	1	-3.00666
0	25350	LOC126208	hHC027547	93	49	747	577	190	35	0.124498	0	1	-3.00581
0	29912	KIAA1683	hHC013820	43	41	345	226	127	-1	0.124638	1	0	-3.00419
0	37863	EFNA4	hHC023026	68	56	545	328	225	10	0.124771	1	0	-3.00265
0	34217	FTS	hHC030417	93	60	745	587	179	26	0.124832	0	1	-3.00194
0	34696	CYP51A1	hHR025989	77	53	616	286	340	23	0.125	1	0	-3
0	841	POLD3	hHC007753	55	46	440	288	163	7	0.125	1	0	-3
0	19412	KIAA1967	hHC013769	99	51	791	610	203	45	0.125158	0	1	-2.99818
0	42941	GGA1	hHC023315	68	57	543	298	367	-1	0.12523	1	0	-2.99735
0	23774	LGP2	hHA039978	65	56	519	287	247	7	0.125241	1	0	-2.99722
0	30844	TRIM15	hHC016580	60	50	479	298	186	6	0.125261	1	0	-2.99699
0	31126	CARD14	hHA040100	95	54	758	477	313	40	0.12533	1	1	-2.9962
0	30682	LCE2D	hHR031460	139	63	1108	611	522	77	0.125451	1	1	-2.9948
0	27427	MS4A2	hHC002623	55	51	437	231	252	-5	0.125858	1	0	-2.99013
0	34837	ATF6	hHC020121	98	60	777	577	204	33	0.126126	0	1	-2.98706
0	27615	OCRL	hCT001279	54	53	428	238	215	-3	0.126168	1	0	-2.98658
0	25798	rac1	hHC017947	106	56	840	590	247	50	0.12619	0	1	-2.98633
0	33792	PNKD	hHC020349	64	46	506	318	194	14	0.126482	1	0	-2.98299
0	14258	LZTR1	hHC019168	90	53	710	513	238	33	0.126761	0	1	-2.97982
0	15361	LOC441097	hHR010204	57	54	449	260	218	-4	0.126949	1	0	-2.97768
0	36759	ADCK2	hHC018441	85	59	669	185	503	5	0.127055	1	0	-2.97647
0	29764	NARG1L	hHR004028	67	44	527	283	250	20	0.127135	1	1	-2.97557
0	29474	PARC	hHC019676	57	46	448	181	281	5	0.127232	1	0	-2.97446
0	30478	IHPK1	hHC016292	61	51	479	288	227	8	0.127349	1	0	-2.97314
0	34236	FAM98A	hHC007101	105	50	823	642	195	49	0.127582	0	1	-2.9705
0	4698	YIPF4	hHC002774	169	54	1324	920	461	119	0.127644	0	1	-2.96981
0	26865	ZC3HAV1	hHA034519	54	50	423	261	183	0	0.12766	1	0	-2.96963
0	22469	TBP	hCM000918	88	53	689	513	188	33	0.127721	0	1	-2.96893
0	34099	WDR7	hHC002865	78	50	610	353	282	23	0.127869	1	1	-2.96726
0	13970	QDPR	hHC001504	75	56	586	372	221	14	0.127986	1	0	-2.96594
0	638	NCK1	hHC007189	64	56	499	243	263	1	0.128257	1	0	-2.9629
0	30973	LOC283567	hHE041240	163	53	1270	858	842	108	0.128346	0	1	-2.96188
0	34092	IL16	hHC015549	61	46	475	235	258	0	0.128421	1	0	-2.96105
0	31249	SLMAP	hHR009944	78	51	605	298	317	25	0.128926	1	1	-2.95539
0	33972	LOC286495	hHR026685	49	46	379	252	136	0	0.129288	1	0	-2.95134
0	31006	IMP4	hHC022436	94	56	727	442	294	28	0.129298	1	1	-2.95122
0	34175	RPN2	hCT000753	123	53	950	707	273	67	0.129474	0	1	-2.94927
0	30821	SPHAR	hHR026648	86	50	664	503	188	31	0.129518	0	1	-2.94877
0	23479	PDGFB	hHA037374	67	59	517	332	196	4	0.129594	1	0	-2.94793
0	26063	IFT81	hHA034159	81	50	625	458	175	27	0.1296	0	1	-2.94786
0	23768	ADPRHL1	hHA035082	78	59	601	361	244	17	0.129784	1	0	-2.94582
0	31131	STRN4	hHC026936	84	54	647	407	265	29	0.12983	1	1	-2.9453
0	24065	ZNF25	hCX048606	70	56	539	311	242	10	0.12987	1	0	-2.94486
0	362	LOC387647	hHR003925	49	46	377	220	194	0	0.129973	1	0	-2.94371
0	27060	KIR2DS1	hHR028867	65	54	500	271	242	6	0.13	1	0	-2.94342
0	13981	FLJ13273	hHC002068	115	50	884	458	469	7	0.13009	1	1	-2.94241
0	29791	SIP1	hHC028784	61	47	467	260	215	12	0.130621	1	0	-2.93654
0	30869	TBP	hCM000920	101	60	773	493	273	39	0.13066	1	1	-2.93611
0	31318	RNF138	hHA033188	68	56	520	336	194	10	0.130769	1	0	-2.9349
0	30949	ZFP1	hHC002840	90	51	688	448	265	36	0.130814	1	1	-2.93441
0	30725	SUSD3	hHA037784	73	50	558	358	205	16	0.130824	1	0	-2.9343
0	23617	CTAGE5	hHR005982	80	60	611	405	208	14	0.130933	1	0	-2.9331
0	33931	COL17A1	hHC002097	85	46	649	460	201	37	0.130971	0	1	-2.93268
0	46416	COL18A1	hHR009600	104	54	794	502	306	46	0.130982	1	1	-2.93256
0	13349	ITGA2B	hHC021004	97	47	740	312	439	42	0.131081	1	1	-2.93147
0	31404	PPP1R3C	hHC013124	70	56	534	335	213	10	0.131086	1	0	-2.93141
0	586	TMTC1	hHC015061	46	46	350	203	184	-3	0.131429	1	0	-2.92765
0	10083	KBTBD6	hHR006963	98	50	742	532	331	44	0.132075	0	1	-2.92057
0	23654	LOC153684	hHC022314	67	56	507	326	204	8	0.13215	1	0	-2.91975
0	23432	PTPRK	hHC002058	106	56	802	611	210	47	0.13217	0	1	-2.91954
0	27787	ZFP95	hHA039871	94	60	711	485	231	24	0.132208	0	1	-2.91912
0	23324	BRCTD1	hHC014922	109	63	824	548	281	43	0.132282	1	1	-2.91832
0	22058	HMBS	hCP000354	88	50	665	432	257	31	0.132331	1	1	-2.91778
0	27134	SPTBN1	hHA036643	57	49	430	255	184	4	0.132558	1	0	-2.9153
0	29701	NR2F1	hHR010640	47	43	354	228	148	1	0.132768	1	0	-2.91302
0	18557	TMEM8	hHC012437	93	53	700	526	207	38	0.132857	0	1	-2.91205
0	31268	PTPN6	hHA039236	252	51	1895	465	1452	183	0.132982	1	1	-2.9107
0	33935	B3GNT5	hHC002289	72	46	541	416	133	21	0.133087	0	1	-2.90956
0	23942	C8orf72	hHC007722	78	56	586	358	268	0	0.133106	1	0	-2.90935
0	34810	LOC348180	hHC026469	87	63	653	397	280	21	0.133231	1	0	-2.908
0	29727	UBOX5	hHC017264	96	53	720	501	227	40	0.133333	0	1	-2.90689
0	26373	FLJ23657	hHC002455	99	50	741	477	278	46	0.133603	1	1	-2.90397
0	30696	LUM	hHC005636	79	50	591	361	238	20	0.133672	1	1	-2.90323
0	32371	SYNCRIP	hHA033344	108	63	806	458	350	43	0.133995	1	1	-2.89975
0	23046	SIPA1L3	hHR007458	86	50	641	408	235	30	0.134165	1	1	-2.89792
0	30724	SLC2A8	hHA037700	75	50	559	368	198	20	0.134168	1	0	-2.89789
0	30393	ZNF275	hHR007376	62	51	462	298	169	9	0.134199	1	0	-2.89755
0	10210	PELI1	hHC006879	71	56	529	346	201	11	0.134216	1	0	-2.89738
0	26661	LOC388969	hHR010903	90	51	670	537	179	42	0.134328	0	1	-2.89616
0	31291	CD59	hHR007736	5025	63	37406	3160	37034	2666	0.134337	1	1	-2.89607
0	30637	FDXR	hHC020120	73	50	543	335	215	14	0.134438	1	0	-2.89498
0	34030	DND1	hHC031005	74	49	550	346	215	24	0.134545	1	1	-2.89383
0	27818	PAH	hHC005995	64	54	475	303	188	2	0.134737	1	0	-2.89178
0	37805	TBP	hCP000274	78	51	578	406	183	25	0.134948	0	1	-2.88952
0	17432	C1orf135	hHC008825	42	43	311	182	134	-3	0.135048	1	0	-2.88845
0	12786	LOC90113	hHC020056	48	46	355	193	172	-3	0.135211	1	0	-2.88671
0	12785	ENC1	hHC020044	70	50	517	296	225	19	0.135397	1	0	-2.88474
0	23852	RTN1	hHC021066	75	56	553	328	258	17	0.135624	1	0	-2.88232
0	30098	DEFB103A	hHC031964	55	44	405	243	163	7	0.135802	1	0	-2.88042
0	19713	FEM1A	hHC029021	83	53	611	423	203	30	0.135843	0	1	-2.87999
0	12816	KIAA1815	hHR009592	75	49	552	220	352	25	0.13587	1	1	-2.87971
0	30570	EPPB9	hHC016100	95	64	699	428	291	30	0.135908	1	0	-2.87929
0	15512	DKFZP434O047	hHR028936	101	59	743	388	382	37	0.135935	1	1	-2.87901
0	12655	QTRTD1	hHC006508	77	51	566	452	140	25	0.136042	0	1	-2.87787
0	34654	HMBS	hCP000165	118	59	867	481	407	54	0.136101	1	1	-2.87725
0	13930	PRIMA1	hHA037984	81	49	595	510	122	2	0.136134	0	1	-2.8769
0	30763	APP	hCT001208	87	50	639	608	141	33	0.13615	0	1	-2.87673
0	18640	PPY2	hHR024449	90	50	661	460	213	36	0.136157	0	1	-2.87665
0	30014	GIT2	hHA034460	79	46	580	433	175	31	0.136207	0	1	-2.87613
0	10245	SYT11	hHR009747	47	50	345	226	130	-4	0.136232	1	0	-2.87586
0	29893	TCP11L1	hHC015632	71	46	521	396	133	27	0.136276	0	1	-2.87539
0	25915	KIAA0841	hHR009007	99	51	726	526	218	45	0.136364	0	1	-2.87447
0	31776	TM2D3	hHA037772	70	56	512	335	184	11	0.136719	1	0	-2.87072
0	29527	KIF11	hHR002672	79	46	576	303	275	30	0.137153	1	1	-2.86614
0	34368	KIAA0232	hHC001917	86	56	627	506	137	10	0.137161	0	1	-2.86606
0	15636	GP5	hHR021832	67	54	488	311	210	6	0.137295	1	0	-2.86465
0	22471	B2M	hCM001014	106	83	772	406	397	20	0.137306	1	0	-2.86454
0	4792	RECQL	hHC015350	96	56	699	428	327	37	0.137339	1	1	-2.86419
0	19207	LOC442389	hHR012029	94	59	684	531	161	32	0.137427	0	1	-2.86326
0	29677	OXA1L	hHA037904	62	44	451	278	184	16	0.137472	1	0	-2.86279
0	14429	SORL1	hHC017428	103	60	749	500	248	43	0.137517	0	1	-2.86232
0	30555	SLC22A12	hHA038840	88	50	637	493	162	33	0.138148	0	1	-2.85572
0	13985	C14orf104	hHC002260	89	54	644	468	203	35	0.138199	0	1	-2.85518
0	4673	PBX3	hHR004298	106	50	766	566	221	44	0.138381	0	1	-2.85328
0	23651	LOC388454	hHR029886	83	57	598	363	236	22	0.138796	1	0	-2.84896
0	22788	EFEMP1	hHA036162	98	60	706	1545	360	9	0.13881	0	1	-2.84881
0	37847	LOC442207	hHR026098	156	56	1123	430	708	97	0.138914	1	1	-2.84774
0	31151	NT5C3	hHC032120	86	50	619	483	178	33	0.138934	0	1	-2.84753
0	18729	P2RX4	hHC025301	96	50	690	455	244	43	0.13913	1	1	-2.84549
0	32283	IFNAR1	hHC017600	102	67	733	441	295	37	0.139154	1	1	-2.84524
0	17969	KIAA0913	hHC016085	96	56	688	482	222	38	0.139535	0	1	-2.8413
0	10144	ALDH7A1	hHR027903	134	49	960	453	563	82	0.139583	1	1	-2.8408
0	31245	OSBP2	hHC009752	93	50	666	482	215	44	0.13964	0	1	-2.84022
0	29963	LOC158301	hHA040496	83	50	594	513	143	27	0.139731	0	1	-2.83928
0	13745	LOC440820	hHR031828	85	56	607	483	145	28	0.140033	0	1	-2.83616
0	18426	TLN1	hCT000737	85	56	607	463	167	24	0.140033	0	1	-2.83616
0	19747	KCMF1	hHC007997	92	54	656	500	184	33	0.140244	0	1	-2.83399
0	9393	MRPS31	hHC007371	92	50	656	332	378	39	0.140244	1	1	-2.83399
0	19604	MGC25181	hHC032201	78	59	556	363	224	20	0.140288	1	0	-2.83354
0	14459	ST3GAL1	hHC028852	103	63	733	518	225	38	0.140518	0	1	-2.83117
0	23133	LOC391809	hHR028062	96	60	683	455	235	36	0.140556	1	1	-2.83078
0	35193	ULBP1	hHR025689	97	63	690	517	179	31	0.14058	0	1	-2.83054
0	26506	LOC284948	hHA038371	47	47	334	218	123	-3	0.140719	1	0	-2.82912
0	48745	PCSK5	hHC014052	69	63	490	175	327	-6	0.140816	1	0	-2.82811
0	31562	DKFZp727G131	hHC022892	79	60	561	321	258	16	0.14082	1	0	-2.82808
0	31003	C20orf194	hHC022328	93	60	660	516	159	34	0.140909	0	1	-2.82716
0	26936	LOC147294	hHR027139	77	49	546	418	131	25	0.141026	0	1	-2.82597
0	19655	ZNF690	hHC006653	111	50	787	543	265	57	0.141042	0	1	-2.8258
0	26951	LOC440470	hHR032119	76	50	537	338	216	20	0.141527	1	1	-2.82085
0	33927	C22orf9	hHC017265	108	57	763	618	213	47	0.141547	0	1	-2.82065
0	24036	LOC284356	hHC021834	57	51	401	246	173	0	0.142145	1	0	-2.81457
0	13984	NUDT12	hHC002176	87	50	612	440	195	33	0.142157	0	1	-2.81444
0	18200	RPE	hHA033665	88	50	619	453	191	36	0.142165	0	1	-2.81436
0	34698	CTAG2	hHC026085	59	50	415	251	194	6	0.142169	1	0	-2.81432
0	30935	DHX30	hHA039800	71	49	498	321	186	17	0.14257	1	0	-2.81025
0	34869	FLJ21125	hHC014745	73	56	511	312	209	14	0.142857	1	0	-2.80735
0	33995	GLT8D3	hHC016689	106	46	741	482	269	55	0.14305	1	1	-2.80541
0	35194	GSH1	hHC025701	129	67	901	493	438	60	0.143174	1	1	-2.80416
0	27187	PPP2R2C	hHC023095	87	50	606	393	218	27	0.143564	1	1	-2.80023
0	26302	CAMSAP1L1	hHC006307	121	51	840	578	294	70	0.144048	0	1	-2.79538
0	31035	TEP1	hHC015032	88	47	610	467	157	23	0.144262	0	1	-2.79323
0	19058	MEIS3	hHR026345	80	60	554	355	216	10	0.144404	1	0	-2.79181
0	26130	UBE2L3	hHR021595	223	53	1543	476	1072	163	0.144524	1	1	-2.79062
0	13687	SELT	hHR028276	115	57	794	513	322	57	0.144836	1	1	-2.78751
0	34802	LOC152905	hHR027621	91	54	628	475	160	33	0.144904	0	1	-2.78683
0	29448	RPS16	hHR026108	527	46	3633	448	3405	500	0.145059	1	1	-2.78529
0	26301	JAZF1	hHC006295	93	59	641	587	68	24	0.145086	0	1	-2.78502
0	25823	ZNF81	hHC030703	105	51	723	502	226	48	0.145228	0	1	-2.78361
0	33925	TREML2	hHC017169	130	60	895	591	317	64	0.145251	1	1	-2.78338
0	30301	RAD51C	hHA032528	69	46	474	312	171	21	0.14557	1	0	-2.78022
0	31067	LOC374676	hHC030392	110	50	755	463	318	57	0.145695	1	1	-2.77897
0	26844	DGCR2	hHR017731	84	54	576	457	140	27	0.145833	0	1	-2.77761
0	18441	PXK	hHC015317	84	54	575	472	127	29	0.146087	0	1	-2.7751
0	33882	C10orf6	hHA034653	64	46	438	268	181	1	0.146119	1	0	-2.77479
0	19511	NIPBL	hHA034301	115	63	787	560	244	50	0.146125	0	1	-2.77473
0	19295	DUSP18	hHC016637	119	60	814	480	356	57	0.146192	1	1	-2.77407
0	34329	ZNF155	hHC023505	94	57	642	475	175	34	0.146417	0	1	-2.77184
0	31425	NDUFB3	hHR019544	102	56	696	310	391	44	0.146552	1	1	-2.77052
0	9016	WDFY3	hHA034551	45	47	307	183	140	-3	0.14658	1	0	-2.77024
0	31122	ANKHD1	hHA035300	81	50	552	462	121	27	0.146739	0	1	-2.76867
0	33926	RBM13	hHC017181	124	56	843	598	270	60	0.147094	0	1	-2.76519
0	31183	PSD4	hHC023672	84	51	571	448	149	30	0.14711	0	1	-2.76503
0	19777	IFT122	hHC025181	101	51	686	608	200	48	0.14723	0	1	-2.76385
0	19086	POLR3D	hHC020009	119	66	808	551	265	50	0.147277	0	1	-2.76339
0	30568	B4GALT5	hHC016004	60	50	407	238	199	6	0.14742	1	0	-2.76199
0	19180	MPV17	hHA037961	87	66	589	360	254	18	0.147708	1	0	-2.75918
0	30060	LOC387824	hHR010172	59	50	399	263	142	0	0.14787	1	0	-2.7576
0	13716	HSPA4	hHA035392	108	54	730	622	233	52	0.147945	0	1	-2.75687
0	23109	ZNF689	hHC018462	104	57	701	451	251	47	0.148359	1	1	-2.75283
0	33611	STK32B	hHC018609	55	44	370	221	169	7	0.148649	1	0	-2.75002
0	23103	TBP	hCP000126	107	64	719	488	246	39	0.148818	0	1	-2.74838
0	31033	LOC390237	hHR029528	94	56	631	500	158	37	0.14897	0	1	-2.74691
0	37845	BCAM	hHC026002	95	50	637	448	214	44	0.149137	0	1	-2.74529
0	22203	DLG4	hHC026166	202	50	1353	323	1060	150	0.149298	1	1	-2.74373
0	13078	MOSPD2	hHC004504	92	53	614	477	148	36	0.149837	0	1	-2.73853
0	10448	LIMK1	hHC007551	84	50	560	408	165	33	0.15	0	1	-2.73697
0	12858	KIF15	hHC003160	119	50	793	500	321	66	0.150063	1	1	-2.73636
0	9022	RP11-378J18.4	hHR030615	89	54	593	293	305	29	0.150084	1	1	-2.73615
0	4891	EIF4E2	hHR027818	62	46	413	267	140	5	0.150121	1	0	-2.7358
0	29668	LRRC23	hHC018236	107	54	711	510	208	49	0.150492	0	1	-2.73224
0	26344	IL32	hHC031747	100	50	664	428	247	44	0.150602	1	1	-2.73118
0	30516	PTPN12	hHA035396	80	50	531	368	171	24	0.150659	0	1	-2.73064
0	32074	GSN	hCT000620	120	73	796	513	298	50	0.150754	1	1	-2.72973
0	19206	FLJ14959	hHC011945	105	56	696	516	188	47	0.150862	0	1	-2.7287
0	19270	LOC159176	hHR026537	127	60	841	578	268	63	0.151011	0	1	-2.72728
0	27426	ZNF630	hHR002539	108	53	715	312	403	53	0.151049	1	1	-2.72691
0	34154	MYO1D	hHC022365	86	47	569	333	247	30	0.151142	1	1	-2.72602
0	27670	CYP4Z1	hHR026539	62	51	410	248	195	2	0.15122	1	0	-2.72528
0	27120	OTUD4	hHA033283	90	54	595	287	329	30	0.151261	1	1	-2.72489
0	13810	VWCE	hHC026464	94	51	621	417	226	42	0.151369	0	1	-2.72386
0	26016	ARHGAP21	hHR029179	72	46	475	321	169	24	0.151579	0	1	-2.72186
0	29703	GCN1L1	hHC010736	64	44	422	280	154	19	0.151659	1	0	-2.7211
0	23918	PDLIM2	hHA039210	59	54	389	240	161	2	0.151671	1	0	-2.72098
0	31771	CD244	hHC018368	73	56	481	313	169	14	0.151767	1	0	-2.72007
0	19208	ANAPC7	hHR012041	113	60	744	558	192	50	0.151882	0	1	-2.71898
0	26765	WDR40A	hHC005911	158	54	1040	483	627	100	0.151923	1	1	-2.71859
0	33822	CCRN4L	hHR014877	161	49	1059	337	772	95	0.15203	1	1	-2.71757
0	19363	PELI1	hHC008381	66	54	434	283	176	5	0.152074	1	0	-2.71716
0	14012	HMGCR	hHC003904	85	50	558	438	138	34	0.15233	0	1	-2.71473
0	18202	TRNT1	hHA033761	94	54	617	500	151	42	0.15235	0	1	-2.71454
0	46741	UTS2R	hHR025620	102	56	668	437	246	44	0.152695	1	1	-2.71128
0	23463	SHC3	hHC003966	144	63	943	620	365	77	0.152704	1	1	-2.71119
0	27842	KCND3	hHC025579	100	56	654	343	357	38	0.152905	1	1	-2.70929
0	14666	RBL2	hHR005344	139	51	909	533	419	83	0.152915	1	1	-2.7092
0	14135	SGCA	hHA039796	106	51	693	438	277	53	0.152958	1	1	-2.70879
0	14281	KIAA1171	hHR008788	136	51	889	558	339	82	0.152981	1	1	-2.70858
0	24268	KIF9	hHC015954	53	47	346	168	179	3	0.153179	1	0	-2.70671
0	16908	FEZ1	hHA038969	52	44	339	140	207	2	0.153392	1	0	-2.7047
0	18403	ANP32C	hHR022325	72	47	469	343	122	6	0.153518	0	1	-2.70352
0	30133	IDH2	hHC023696	76	46	495	380	120	27	0.153535	0	1	-2.70336
0	26424	MYL9	hHA032899	93	51	605	457	167	42	0.153719	0	1	-2.70163
0	21305	INPP5B	hHC011982	70	46	455	462	142	20	0.153846	0	1	-2.70044
0	31199	LOC283604	hHR020984	94	54	611	398	231	35	0.153846	1	1	-2.70044
0	13772	LAP3	hHR002368	101	50	656	500	204	47	0.153963	0	1	-2.69934
0	18213	PRKAG1	hHC003989	74	46	480	516	108	17	0.154167	0	1	-2.69744
0	30850	CDCA7	hHC016868	119	50	771	507	288	71	0.154345	1	1	-2.69577
0	31337	ZFP64	hHA036824	78	50	505	286	224	26	0.154455	1	1	-2.69474
0	19055	CD79A	hHC026237	129	66	835	608	267	57	0.154491	0	1	-2.69441
0	14291	ZC3HAV1	hHC004660	89	53	576	458	153	33	0.154514	0	1	-2.69419
0	10329	LOC441727	hHR025299	81	53	524	386	152	24	0.15458	0	1	-2.69357
0	26811	PPP1R1B	hHA040375	126	53	815	680	177	71	0.154601	0	1	-2.69338
0	12979	PRPF19	hHA037420	78	50	504	388	131	24	0.154762	0	1	-2.69188
0	19261	USP24	hHC003869	175	64	1129	715	411	110	0.155004	1	1	-2.68962
0	30496	CTBP2	hHC025988	107	66	690	631	162	40	0.155072	0	1	-2.68899
0	34330	RP11-217H1.1	hHR023517	116	66	748	548	213	40	0.15508	0	1	-2.68891
0	18207	C20orf95	hHR021365	123	66	792	611	200	33	0.155303	0	1	-2.68684
0	17999	ZNF430	hHC027509	112	56	721	527	233	50	0.15534	0	1	-2.6865
0	27150	NDUFS2	hHA032419	106	56	682	388	312	47	0.155425	1	1	-2.68571
0	18362	STAT1	hHC013793	81	50	521	403	129	26	0.15547	0	1	-2.68529
0	26789	F2RL3	hHC025495	87	50	559	408	161	34	0.155635	0	1	-2.68376
0	23889	FLJ22596	hHR024414	68	53	436	245	200	13	0.155963	1	0	-2.68072
0	27001	TFCP2	hHC021079	90	49	577	393	190	35	0.155979	0	1	-2.68057
0	23800	TSPY1	hHC032010	71	54	455	295	180	9	0.156044	1	0	-2.67998
0	13693	KIFC2	hHC025876	79	51	506	388	138	22	0.156126	0	1	-2.67921
0	21955	CAP2	hHR013230	134	46	858	251	631	85	0.156177	1	1	-2.67874
0	30281	C9orf24	hHA036560	72	46	461	363	109	18	0.156182	0	1	-2.6787
0	19087	PNCK	hHR020093	113	60	723	500	225	53	0.156293	0	1	-2.67767
0	30164	SCAMP1	hHR001724	82	46	524	390	144	33	0.156489	0	1	-2.67587
0	23707	PDLIM2	hHC019134	86	57	549	388	171	24	0.156648	0	1	-2.6744
0	17897	RER1	hHC026069	101	56	644	516	146	43	0.156832	0	1	-2.67271
0	31134	dJ222E13.2	hHR027044	108	56	688	428	280	47	0.156977	1	1	-2.67138
0	34661	HEBP1	hHC018585	127	56	809	483	332	70	0.156984	1	1	-2.67131
0	26784	CLCN6	hHA035971	86	50	547	446	116	27	0.157221	0	1	-2.66913
0	49222	MFI2	hHA038448	64	51	407	187	259	5	0.157248	1	0	-2.66888
0	27724	ANXA7	hCT001099	103	59	655	338	350	42	0.157252	1	1	-2.66885
0	23443	KTI12	hHC011454	96	63	609	485	133	26	0.157635	0	1	-2.66534
0	10022	HMBS	hCP000543	86	50	544	432	148	33	0.158088	0	1	-2.6612
0	30090	LOC402336	hHR027740	778	53	4920	251	4675	350	0.15813	1	1	-2.66082
0	13258	CTSL2	hHC010072	127	53	803	546	262	70	0.158157	0	1	-2.66057
0	29735	C8orf13	hHC002288	69	43	436	288	153	24	0.158257	1	1	-2.65966
0	23710	WHSC1	hHA034218	101	56	638	352	290	41	0.158307	1	1	-2.6592
0	14164	OMA1	hHC005824	92	50	581	441	168	39	0.158348	0	1	-2.65883
0	26890	KIF13A	hHC007267	77	49	486	348	158	27	0.158436	0	1	-2.65803
0	14445	KIAA0350	hHC009748	103	53	649	482	197	46	0.158706	0	1	-2.65557
0	23744	CCNE2	hHR004746	117	56	737	332	409	60	0.158752	1	1	-2.65516
0	26802	LOC389069	hHR029923	77	51	485	355	140	19	0.158763	0	1	-2.65505
0	27726	MGC59937	hHR030763	125	84	787	467	339	39	0.158831	1	0	-2.65444
0	31014	RNF126	hHA040484	102	54	642	372	277	46	0.158879	1	1	-2.654
0	34691	MMP23B	hHR025785	135	56	849	406	453	80	0.159011	1	1	-2.65281
0	22869	RAD23A	hHA039318	99	50	622	447	182	47	0.159164	0	1	-2.65141
0	34688	FAM29A	hHC028293	82	50	514	423	106	29	0.159533	0	1	-2.64807
0	30735	ORMDL1	hHA034808	98	53	614	507	128	41	0.159609	0	1	-2.64739
0	17581	C2orf13	hHC017549	47	43	294	186	118	0	0.159864	1	0	-2.64508
0	12727	TRIM23	hHC002668	95	76	594	278	316	20	0.159933	1	0	-2.64446
0	23473	FYN	hHC026718	129	66	805	565	272	58	0.160248	0	1	-2.64162
0	29862	C1orf181	hHC008348	86	46	536	388	156	37	0.160448	0	1	-2.63982
0	46507	WDR48	hHC012084	99	59	617	448	194	37	0.160454	0	1	-2.63977
0	18275	ME2	hHC030773	91	56	567	472	99	35	0.160494	0	1	-2.63941
0	34354	SLC25A25	hHR006621	122	47	759	438	333	73	0.160738	1	1	-2.63722
0	4901	OPN1MW	hHC032138	49	46	304	167	146	0	0.161184	1	0	-2.63322
0	30495	LOC90499	hHR025976	109	54	676	508	191	53	0.161243	0	1	-2.6327
0	34391	HCFC1	hHC024561	95	59	589	430	171	30	0.16129	0	1	-2.63227
0	13313	GNE	hHC008908	121	50	750	527	230	67	0.161333	0	1	-2.63188
0	14149	KIAA2026	hHR002836	81	53	502	378	157	23	0.161355	0	1	-2.63169
0	12920	LONRF1	hHC001528	97	51	601	395	223	46	0.161398	1	1	-2.63131
0	30608	DNM1DN22	hHR026372	89	50	551	337	226	33	0.161525	1	1	-2.63018
0	18064	KIAA1509	hHR009473	75	46	464	381	101	27	0.161638	0	1	-2.62916
0	48867	MFN2	hHA040644	63	47	389	160	224	4	0.161954	1	0	-2.62635
0	13073	DCTN4	hHC004300	172	51	1062	497	585	128	0.161959	1	1	-2.6263
0	31743	IL28RA	hHR005504	161	63	993	488	500	97	0.162135	1	1	-2.62473
0	26184	UBXD8	hHC011899	129	64	794	548	234	67	0.162469	0	1	-2.62177
0	30937	PAQR6	hHA039896	85	50	523	357	178	26	0.162524	0	1	-2.62128
0	33843	WWTR1	hHC005553	100	46	615	428	197	50	0.162602	0	1	-2.62059
0	33734	TPD52	hHR003741	80	46	491	431	145	31	0.162933	0	1	-2.61765
0	27018	TMBIM4	hHC001891	89	53	546	568	46	27	0.163004	0	1	-2.61702
0	18846	SETD1B	hHC007457	120	50	736	483	263	67	0.163043	1	1	-2.61667
0	34393	CHKA	hHC009681	92	54	564	425	144	29	0.163121	0	1	-2.61599
0	23141	RDM1	hHC025758	108	57	662	378	304	49	0.163142	1	1	-2.6158
0	29667	RNU22	hHR018224	102	50	625	463	168	46	0.1632	0	1	-2.61529
0	35134	LUC7L	hHA039717	116	60	710	548	167	53	0.16338	0	1	-2.61369
0	483	CNTNAP4	hHA039721	51	44	312	157	172	2	0.163462	1	0	-2.61298
0	27729	LOC388154	hHR030943	120	74	734	503	257	46	0.163488	0	1	-2.61275
0	18326	TMPO	hHR004385	130	54	795	476	322	76	0.163522	1	1	-2.61244
0	31069	ZNF443	hHC030488	122	54	745	442	314	62	0.163758	1	1	-2.61036
0	26340	LOC441429	hHR031555	78	51	476	335	163	9	0.163866	0	1	-2.60942
0	23436	C5orf5	hHC002250	95	59	579	405	207	34	0.164076	0	1	-2.60756
0	18352	RCOR3	hHC002945	100	50	609	455	169	47	0.164204	0	1	-2.60644
0	31383	SPTB	hHC021752	102	63	621	535	85	28	0.164251	0	1	-2.60602
0	26995	LOC342460	hHR020791	91	50	554	436	146	37	0.16426	0	1	-2.60595
0	27062	LOC439993	hHR028963	106	70	645	445	200	31	0.164341	0	1	-2.60523
0	46447	CAMK2G	hHR005748	114	60	693	527	193	51	0.164502	0	1	-2.60382
0	31433	TNT	hHC011864	122	56	740	335	412	8	0.164865	1	1	-2.60064
0	38377	ZNF440	hHR029266	61	50	370	232	147	9	0.164865	1	0	-2.60064
0	32165	PALM2	hHA034976	138	60	836	492	353	73	0.165072	1	1	-2.59883
0	29817	TLN1	hCT000848	93	56	563	426	143	33	0.165187	0	1	-2.59783
0	30482	SLC25A3	hHC016484	116	56	702	473	239	57	0.165242	0	1	-2.59735
0	26833	LOC390234	hHR029527	86	53	520	373	163	28	0.165385	0	1	-2.5961
0	23381	TRIM29	hHA034590	116	60	701	448	256	53	0.165478	1	1	-2.59529
0	31008	PCBP3	hHC022532	99	50	598	456	157	49	0.165552	0	1	-2.59465
0	30638	TPSG1	hHC020132	90	50	542	338	212	34	0.166052	1	1	-2.5903
0	27362	EXTL3	hHC022891	128	73	770	492	253	50	0.166234	1	1	-2.58871
0	27127	CNTFR	hHC025207	100	50	601	388	216	49	0.166389	1	1	-2.58736
0	23532	SDHAL2	hHC031050	102	60	611	450	165	39	0.166939	0	1	-2.5826
0	26041	ZHX1	hHC007759	80	44	479	280	202	35	0.167015	1	1	-2.58195
0	20215	DKFZP434A062	hHR018053	78	50	467	152	319	10	0.167024	1	1	-2.58188
0	29442	LOC56901	hHC025820	55	46	329	193	166	4	0.167173	1	0	-2.58058
0	26595	GGT1	hHA033463	67	47	400	240	173	19	0.1675	1	0	-2.57777
0	37748	GRM5	hHC007509	100	46	597	160	439	37	0.167504	1	1	-2.57773
0	26805	MGC13170	hHC022423	88	50	525	278	259	33	0.167619	1	1	-2.57674
0	10294	DDX58	hHC007839	89	50	530	467	140	34	0.167925	0	1	-2.57412
0	873	LOC441968	hHR025033	66	44	393	253	153	20	0.167939	1	0	-2.57399
0	30609	DNAJC5	hHR026456	78	50	464	333	146	20	0.168103	0	1	-2.57258
0	33986	RP11-323H21.4	hHR028509	122	53	724	577	166	61	0.168508	0	1	-2.56911
0	34726	CCDC40	hHR019749	71	56	421	277	158	7	0.168646	1	0	-2.56793
0	34285	HNRPD	hHC027153	227	77	1346	876	498	139	0.168648	1	1	-2.56791
0	30876	KRTAP4-11	hHR030788	85	47	504	352	174	29	0.168651	0	1	-2.56789
0	49018	ZNF284	hHC009072	65	56	385	183	220	-3	0.168831	1	0	-2.56635
0	42841	C7orf29	hHC007763	225	50	1331	473	871	167	0.169046	1	1	-2.56451
0	33739	SIPA1L2	hHC014385	48	46	283	172	128	-3	0.169611	1	0	-2.5597
0	30868	HMBS	hCM000836	124	60	731	515	215	66	0.169631	0	1	-2.55953
0	19324	ANXA7	hCT001097	188	63	1108	813	291	117	0.169675	0	1	-2.55915
0	14314	SERAC1	hHC010336	135	53	794	473	331	78	0.170025	1	1	-2.55618
0	14056	IGKC	hHO045184	92	51	541	403	158	38	0.170055	0	1	-2.55592
0	18514	ALG2	hHC010337	90	47	529	402	142	40	0.170132	0	1	-2.55527
0	37935	COL12A1	hHR003826	135	51	793	486	337	80	0.17024	1	1	-2.55436
0	31154	KIAA1833	hHR032228	107	53	628	446	202	51	0.170382	0	1	-2.55315
0	34694	LCE5A	hHR025893	129	54	757	312	454	76	0.17041	1	1	-2.55292
0	18211	FAM102B	hHC003893	104	50	609	398	237	53	0.170772	1	1	-2.54986
0	22555	CCDC15	hHC013494	109	53	638	460	193	53	0.170846	0	1	-2.54923
0	18369	BPGM	hHC006101	94	53	550	402	162	38	0.170909	0	1	-2.5487
0	33730	CTSO	hHC003549	67	44	392	246	159	20	0.170918	1	1	-2.54862
0	31253	GALNS	hHC024728	92	59	538	305	243	30	0.171004	1	1	-2.5479
0	22993	ARL6IP2	hHC023382	91	50	532	318	224	39	0.171053	1	1	-2.54749
0	26681	SMU1	hHC031063	91	53	532	377	169	36	0.171053	0	1	-2.54749
0	29618	C9orf78	hHC014684	162	136	947	448	496	24	0.171067	1	0	-2.54737
0	13192	CCL5	hHC015352	103	53	602	485	126	48	0.171096	0	1	-2.54712
0	29108	DKFZp434E1119	hHR006739	89	49	520	150	377	21	0.171154	1	1	-2.54663
0	28141	PAQR8	hHC007711	114	56	666	328	336	51	0.171171	1	1	-2.54649
0	14661	LOC130355	hHR005140	89	53	519	448	94	33	0.171484	0	1	-2.54386
0	23771	USP52	hHA035262	88	54	513	295	222	27	0.17154	1	1	-2.54338
0	32072	TBP	hCP000524	164	67	956	583	373	93	0.171548	1	1	-2.54331
0	26492	KEAP1	hHC005443	110	50	641	432	213	60	0.171607	0	1	-2.54282
0	29734	RP11-93B10.1	hHC002204	81	46	472	283	195	34	0.17161	1	1	-2.54279
0	27033	MAP3K5	hHC017623	133	53	775	426	352	78	0.171613	1	1	-2.54277
0	13195	ITPK1	hHR017836	161	54	938	551	405	107	0.171642	1	1	-2.54253
0	44370	TAC4	hHC018287	103	50	600	156	449	26	0.171667	1	1	-2.54232
0	31242	ZNF721	hHC024548	114	53	663	457	223	60	0.171946	0	1	-2.53998
0	12826	CCRL2	hHC031192	129	50	750	433	332	80	0.172	1	1	-2.53952
0	34839	ADAMTSL4	hHC020217	102	56	593	398	196	43	0.172007	0	1	-2.53946
0	30955	MLF2	hHC013496	101	51	587	402	200	45	0.172061	0	1	-2.53901
0	9099	LOC440545	hHR032043	47	46	273	172	126	-2	0.172161	1	0	-2.53817
0	34109	ALDH6A1	hHC013713	134	56	778	523	277	74	0.172237	0	1	-2.53754
0	33775	PCBP2	hHA033009	126	50	731	605	233	73	0.172367	0	1	-2.53645
0	23703	OSBPL7	hHC018942	141	60	818	457	360	80	0.172372	1	1	-2.53641
0	30401	FAM30A	hHC030032	63	46	365	227	150	13	0.172603	1	0	-2.53447
0	31133	ANGPTL4	hHC027032	116	56	672	453	279	53	0.172619	0	1	-2.53434
0	26459	NOS1AP	hHC009271	140	57	811	468	345	79	0.172626	1	1	-2.53428
0	13088	RNF185	hHA039928	53	46	307	180	144	-2	0.172638	1	0	-2.53417
0	37444	LOC148203	hHC027861	94	54	544	163	389	22	0.172794	1	1	-2.53287
0	26255	HMBS	hCP000247	103	51	596	458	148	43	0.172819	0	1	-2.53267
0	19023	DNAJC6	hHC002429	168	60	972	548	435	110	0.17284	1	1	-2.5325
0	26374	ETV5	hHC002467	110	49	636	422	221	55	0.172956	1	1	-2.53152
0	22714	KNDC1	hHC010338	64	59	370	207	190	-9	0.172973	1	0	-2.53138
0	13781	KLHL20	hHC003604	89	50	514	388	141	36	0.173152	0	1	-2.52989
0	14523	C6orf136	hHC025012	78	50	450	365	104	24	0.173333	0	1	-2.52838
0	14509	C2orf30	hHA033940	116	50	669	456	246	63	0.173393	0	1	-2.52788
0	30713	TMEM33	hHC003416	154	60	888	553	370	91	0.173423	1	1	-2.52763
0	36903	FUT6	hHC026121	63	53	363	218	150	3	0.173554	1	0	-2.52655
0	25228	CNGA2	hHC016315	57	46	328	183	153	5	0.17378	1	0	-2.52466
0	27190	PPP1R3G	hHR023203	89	50	512	333	194	34	0.173828	1	1	-2.52427
0	26740	RAD50	hHR015427	87	50	500	373	137	33	0.174	0	1	-2.52284
0	29409	CDC26	hHC018512	75	46	431	313	123	30	0.174014	0	1	-2.52273
0	27093	RUFY3	hHR007831	91	50	522	363	169	39	0.17433	0	1	-2.52011
0	26659	ETFDH	hHC010807	119	53	682	518	205	63	0.174487	0	1	-2.51881
0	19688	VPS16	hHC024329	115	60	659	488	211	53	0.174507	0	1	-2.51864
0	22614	MBD1	hHA040482	119	51	681	468	224	65	0.174743	0	1	-2.51669
0	9002	KCNK17	hHC018903	89	51	509	433	91	12	0.174853	0	1	-2.51579
0	26410	LOC286208	hHR026467	78	50	446	328	126	26	0.174888	0	1	-2.5155
0	13350	LAMA5	hHC021016	74	49	423	300	142	20	0.174941	0	1	-2.51506
0	23681	TPSAB1	hHC029406	108	56	617	328	295	48	0.175041	1	1	-2.51424
0	18228	GPR161	hHA037313	106	53	605	503	165	50	0.175207	0	1	-2.51287
0	23563	C13orf1	hHC008382	121	63	690	468	230	57	0.175362	0	1	-2.51159
0	14535	TPM1	hHA036724	90	51	512	441	89	40	0.175781	0	1	-2.50815
0	30331	C1orf77	hHC021680	76	44	432	312	124	26	0.175926	0	1	-2.50696
0	18062	MICAL3	hHC009377	85	50	483	380	118	33	0.175983	0	1	-2.50649
0	17968	TIAF1	hHC016001	109	54	619	493	153	55	0.17609	0	1	-2.50561
0	19840	GGCX	hHC023177	132	60	749	458	299	70	0.176235	1	1	-2.50443
0	33662	PFDN1	hHR022941	91	46	516	408	128	45	0.176357	0	1	-2.50343
0	31379	SARS2	hHC021560	103	56	584	368	248	43	0.17637	1	1	-2.50332
0	18991	GPR89A	hHR031613	124	60	703	478	237	63	0.176387	0	1	-2.50318
0	29590	RASSF7	hHC020252	123	46	697	363	349	74	0.176471	1	1	-2.5025
0	30034	PRSS23	hHR007004	63	43	357	235	129	17	0.176471	1	0	-2.5025
0	25854	TncRNA	hHE041755	105	50	594	450	157	53	0.176768	0	1	-2.50007
0	22584	DERL1	hHA035970	106	50	599	473	141	54	0.176962	0	1	-2.49849
0	34351	CSPG6	hHR021105	119	46	672	421	294	70	0.177083	1	1	-2.4975
0	21610	BACE2	hHA034266	73	46	412	320	110	24	0.177184	0	1	-2.49668
0	29824	ANXA7	hCT001148	69	44	389	407	112	22	0.177378	0	1	-2.4951
0	30048	BCAP29	hHR004988	99	50	558	460	133	47	0.177419	0	1	-2.49476
0	21766	FLJ25416	hHR001818	85	46	479	318	171	37	0.177453	1	1	-2.49449
0	13714	EGLN2	hHC023008	106	50	597	498	142	56	0.177554	0	1	-2.49367
0	27613	APP	hCT001183	99	56	557	335	235	37	0.177738	1	1	-2.49218
0	31206	PLA2R1	hHC006692	107	50	602	498	125	1	0.177741	0	1	-2.49215
0	31290	CDC27	hHC020708	149	73	838	510	358	77	0.177804	1	1	-2.49164
0	27363	AMN	hHC022975	85	54	478	303	197	27	0.177824	1	1	-2.49148
0	32621	FLJ23554	hHA035624	92	50	517	152	370	36	0.17795	1	1	-2.49046
0	21648	C1orf103	hHC004986	1051	66	5906	4586	5748	27	0.177955	0	1	-2.49042
0	31390	LOC389827	hHR023204	96	50	539	423	131	44	0.178108	0	1	-2.48918
0	34392	LOC401599	hHR024573	101	53	566	423	158	41	0.178445	0	1	-2.48645
0	9383	C10orf111	hHC011883	80	50	448	363	92	3	0.178571	0	1	-2.48543
0	30134	LOC441121	hHR023708	85	46	476	372	106	37	0.178571	0	1	-2.48543
0	14284	ZNF264	hHC006976	125	63	700	511	225	63	0.178571	0	1	-2.48543
0	34173	SFTPA1	hCT000657	137	66	766	686	101	40	0.178851	0	1	-2.48317
0	31082	LA16c-360B4.1	hHC008804	80	50	447	306	151	20	0.178971	0	1	-2.4822
0	31161	LOC253039	hHR012632	103	51	575	361	214	48	0.17913	1	1	-2.48092
0	13774	FLJ38482	hHC002464	98	63	547	505	92	33	0.179159	0	1	-2.48069
0	23065	ODF2L	hHC005334	97	54	540	430	125	39	0.17963	0	1	-2.4769
0	31244	CCL26	hHC009668	113	50	629	491	167	60	0.17965	0	1	-2.47674
0	31748	FIGNL1	hHC005708	101	53	562	300	264	43	0.179715	1	1	-2.47621
0	21209	SEC24A	hHC009294	108	46	600	213	407	57	0.18	1	1	-2.47393
0	18545	LOC133748	hHR027989	128	70	711	585	125	50	0.180028	0	1	-2.47371
0	27457	LOC342970	hHR026335	79	53	438	208	271	23	0.180365	1	0	-2.47101
0	13814	C1orf38	hHC023968	87	50	482	403	109	34	0.180498	0	1	-2.46995
0	211	SLC39A14	hHC009385	76	44	421	235	194	32	0.180523	1	1	-2.46975
0	21541	GPR116	hHR025614	71	47	393	293	115	16	0.180662	0	1	-2.46864
0	13951	KIAA1219	hHR010612	101	49	559	448	136	47	0.18068	0	1	-2.46849
0	10351	C11orf1	hHA032499	124	47	686	430	283	73	0.180758	1	1	-2.46787
0	29321	LOC387946	hHR019303	51	46	282	168	119	3	0.180851	1	0	-2.46713
0	18791	PALM2	hHC023285	133	54	734	498	246	79	0.181199	0	1	-2.46435
0	13217	BZW1	hHR030412	97	50	535	452	113	43	0.181308	0	1	-2.46348
0	25942	CCNG1	hHA036379	154	47	848	448	415	103	0.181604	1	1	-2.46113
0	30137	PSIP1	hHA036176	111	47	611	430	191	59	0.181669	0	1	-2.46061
0	30721	USP36	hHC018392	109	51	599	363	253	55	0.18197	1	1	-2.45823
0	26897	PDE8A	hHC004951	293	53	1610	513	1119	233	0.181988	1	1	-2.45809
0	27040	KCTD13	hHC024451	84	50	461	336	140	26	0.182213	0	1	-2.45631
0	22570	ZNF175	hHC006114	145	53	794	500	298	88	0.18262	1	1	-2.45309
0	18860	USP30	hHC005057	122	51	668	388	291	70	0.182635	1	1	-2.45297
0	9992	CA2	hHC025599	112	51	613	438	211	58	0.182708	0	1	-2.45239
0	9115	C19orf7	hHC009003	91	56	498	412	98	33	0.182731	0	1	-2.45221
0	14044	EIF2B4	hHC016576	91	53	498	407	107	34	0.182731	0	1	-2.45221
0	26874	MEIS3P1	hHC030691	108	53	591	463	155	53	0.182741	0	1	-2.45213
0	34725	NACA	hHR019737	114	56	623	320	320	53	0.182986	1	1	-2.4502
0	583	TRNK	hHR029545	104	47	568	303	287	56	0.183099	1	1	-2.44931
0	31655	CICE	hHR026240	85	66	464	278	194	14	0.18319	1	0	-2.44859
0	31034	HIC2	hHC029540	101	51	551	488	121	50	0.183303	0	1	-2.4477
0	41702	C20orf29	hHC021046	103	46	561	155	410	38	0.183601	1	1	-2.44536
0	12650	LOC124491	hHC006232	101	54	550	400	160	43	0.183636	0	1	-2.44508
0	21339	TMEM39B	hHC011310	102	46	555	346	234	53	0.183784	1	1	-2.44392
0	26001	LOC339984	hHR024655	101	49	549	428	138	50	0.183971	0	1	-2.44245
0	29427	TOPBP1	hHC016304	108	60	587	388	205	43	0.183986	1	1	-2.44233
0	13694	C9orf85	hHC025888	89	56	483	366	128	28	0.184265	0	1	-2.44015
0	30376	LPPR2	hHC019580	89	46	483	380	117	40	0.184265	0	1	-2.44015
0	13787	UBXD7	hHR014260	122	56	662	423	264	64	0.18429	1	1	-2.43995
0	9759	PCDHGB4	hHR012147	114	51	618	218	410	56	0.184466	1	1	-2.43857
0	32313	LOC285388	hHR029024	138	70	748	468	286	61	0.184492	1	1	-2.43837
0	27094	ALOX5	hHC007843	91	49	493	338	158	35	0.184584	0	1	-2.43765
0	27396	EIF4B	hHC031819	107	53	579	286	311	53	0.184801	1	1	-2.43595
0	23588	PIK4CA	hHA039882	125	60	676	417	260	63	0.184911	1	1	-2.4351
0	30948	TFPI	hHC002756	313	54	1692	460	1267	253	0.184988	1	1	-2.4345
0	26102	DSCR3	hHA032539	278	44	1502	330	1181	30	0.185087	1	1	-2.43373
0	34697	COPE	hHC026073	80	51	432	258	186	23	0.185185	1	1	-2.43296
0	23474	LOC402663	hHR026730	119	60	642	485	162	60	0.185358	0	1	-2.43161
0	26364	RBMX	hHC015811	140	50	755	460	322	83	0.18543	1	1	-2.43105
0	33988	NOP5/NOP58	hHC028605	370	56	1994	697	1442	277	0.185557	1	1	-2.43007
0	14410	LCHN	hHR006880	120	51	646	442	218	69	0.185759	0	1	-2.4285
0	14166	DDX26	hHR005920	104	51	559	458	126	52	0.186047	0	1	-2.42626
0	42975	WFDC1	hHC019571	155	66	833	560	316	20	0.186074	0	1	-2.42605
0	14191	MYBL2	hHC025588	109	53	585	473	129	54	0.186325	0	1	-2.42411
0	18649	ZNF161	hHC009941	131	59	703	500	226	67	0.186344	0	1	-2.42396
0	25322	FNDC3B	hHC002395	71	46	381	261	124	21	0.186352	0	1	-2.4239
0	34780	TPP1	hHC003525	149	56	799	388	402	90	0.186483	1	1	-2.42288
0	698	GSTM1	hHR031957	78	46	418	298	133	30	0.186603	0	1	-2.42196
0	13229	NUCB2	hHC008716	189	53	1012	533	485	133	0.186759	1	1	-2.42075
0	26048	FHOD3	hHC008059	91	47	486	320	173	42	0.187243	1	1	-2.41702
0	13348	LANCL1	hHC020920	153	50	815	477	485	101	0.18773	1	1	-2.41327
0	47890	SGCD	hHC007272	95	46	506	135	374	10	0.187747	1	1	-2.41314
0	18111	CSTF2T	hHC003317	122	54	649	483	191	69	0.187982	0	1	-2.41134
0	12666	ITGB3BP	hHA035416	72	54	383	251	157	16	0.18799	1	0	-2.41128
0	35072	HMBS	hCM001029	98	53	521	433	91	43	0.1881	0	1	-2.41043
0	23447	POMZP3	hHA033534	89	59	473	326	170	27	0.188161	0	1	-2.40996
0	3650	CDH11	hHC002797	91	46	483	143	343	45	0.188406	1	1	-2.40808
0	30936	RTEL1	hHA039812	90	49	477	355	134	37	0.188679	0	1	-2.40599
0	34107	GLB1	hHC013617	153	63	810	543	278	87	0.188889	0	1	-2.40439
0	31191	GLRB	hHA036344	119	51	629	346	291	65	0.189189	1	1	-2.4021
0	31320	DHX9	hHA033284	127	69	670	408	282	61	0.189552	1	1	-2.39933
0	34581	FAM55C	hHC011793	125	51	659	456	218	72	0.189681	0	1	-2.39835
0	26796	AK2	hHC029635	129	51	679	390	308	75	0.189985	1	1	-2.39604
0	13446	RASD1	hHC007960	76	46	400	280	130	28	0.19	0	1	-2.39593
0	34580	YLPM1	hHC011709	118	51	621	462	193	62	0.190016	0	1	-2.39581
0	13894	TSPYL4	hHC005536	111	49	584	772	132	60	0.190068	0	1	-2.39541
0	30506	MIS12	hHC006500	179	56	941	442	473	120	0.190223	1	1	-2.39424
0	26876	ZNF554	hHC008515	98	54	515	423	99	40	0.190291	0	1	-2.39372
0	14167	OTUD6B	hHC006004	110	53	578	457	142	54	0.190311	0	1	-2.39357
0	30747	TMTC3	hHC010424	131	54	688	382	308	76	0.190407	1	1	-2.39284
0	21491	HOOK2	hHC015534	79	46	414	346	79	30	0.190821	0	1	-2.38971
0	27037	DHRS3	hHC024343	130	50	681	418	268	73	0.190896	1	1	-2.38914
0	5128	C3orf29	hHA038774	55	49	288	186	122	2	0.190972	1	0	-2.38857
0	15514	CSAG1	hHC029032	200	76	1046	505	550	124	0.191205	1	1	-2.38681
0	22358	PCDHGB3	hHR012066	108	60	564	412	172	46	0.191489	0	1	-2.38466
0	17578	HNRPM	hHC017369	115	53	600	353	272	60	0.191667	1	1	-2.38333
0	41614	TOP1P1	hHR010294	98	46	511	157	356	27	0.191781	1	1	-2.38247
0	26914	ZC3H5	hHR010339	117	47	610	362	264	67	0.191803	1	1	-2.3823
0	29798	PACS1	hHC016796	80	44	417	263	160	32	0.191847	1	1	-2.38198
0	27035	LOC133619	hHC024247	136	50	708	552	282	83	0.19209	0	1	-2.38014
0	22797	FLJ22386	hHC020886	123	53	640	511	149	67	0.192188	0	1	-2.37941
0	18970	ANTXR1	hHA035561	94	60	488	326	180	34	0.192623	0	1	-2.37615
0	22209	NHSL1	hHC026454	136	74	706	590	129	62	0.192635	0	1	-2.37606
0	33643	PLCB2	hHC025905	95	46	493	380	135	47	0.192698	0	1	-2.37559
0	4664	ZFAND1	hHC008438	323	60	1676	1045	694	266	0.192721	1	1	-2.37542
0	14488	LAMC1	hHC020608	165	60	856	517	348	104	0.192757	1	1	-2.37514
0	18432	ORC3L	hHC029441	101	51	523	355	180	49	0.193117	0	1	-2.37246
0	33393	TMEM68	hHC007784	103	54	533	160	386	33	0.193246	1	1	-2.37149
0	22465	ATG7	hHC011094	133	53	688	475	235	77	0.193314	0	1	-2.37098
0	34727	TIMM17B	hHR019833	72	51	372	235	154	3	0.193548	1	0	-2.36923
0	12634	TRNP	hHR028120	113	50	583	242	356	61	0.193825	1	1	-2.36717
0	23976	LOC392787	hHR025098	95	54	490	248	252	39	0.193878	1	1	-2.36678
0	34805	TRAPPC6A	hHC026265	102	51	526	430	113	45	0.193916	0	1	-2.36649
0	10336	DDX3X	hHA036735	90	53	464	236	236	33	0.193966	1	1	-2.36613
0	31124	STMN1	hHA040004	117	51	603	453	171	63	0.19403	0	1	-2.36565
0	23732	UGCGL2	hHC008778	144	56	742	440	299	87	0.19407	1	1	-2.36535
0	26558	PCDHGB2	hHR012067	118	50	608	525	280	70	0.194079	0	1	-2.36528
0	34612	EVC	hHC005181	125	76	644	486	177	54	0.194099	0	1	-2.36513
0	29978	CGB2	hHR029276	73	46	376	253	135	24	0.194149	0	1	-2.36476
0	13992	RNF146	hHC011392	122	51	628	668	168	53	0.194268	0	1	-2.36388
0	34287	LOC401308	hHR027249	154	56	791	562	263	90	0.19469	0	1	-2.36075
0	33791	RHOBTB2	hHC020337	83	47	426	276	168	33	0.194836	1	1	-2.35967
0	22616	FASTK	hHA040578	122	50	625	481	157	70	0.1952	0	1	-2.35698
0	34244	FLJ38725	hHC004797	153	51	782	593	205	95	0.195652	0	1	-2.35364
0	22978	ACTL6B	hHA038754	82	64	419	261	176	12	0.195704	1	0	-2.35325
0	45223	C11orf48	hHR019595	83	50	424	171	257	23	0.195755	1	1	-2.35288
0	13954	ATP9A	hHC010720	123	49	628	441	211	74	0.19586	0	1	-2.35211
0	31139	C14orf138	hHC027704	126	54	643	395	270	69	0.195956	1	1	-2.3514
0	21336	C14orf32	hHC002298	101	47	515	375	198	52	0.196117	0	1	-2.35022
0	9102	LOC402521	hHR032151	51	46	260	167	108	1	0.196154	1	0	-2.34994
0	30716	FADS1	hHC018116	253	56	1289	421	891	194	0.196276	1	1	-2.34904
0	27249	TMPRSS3	hHC007639	107	50	545	338	224	54	0.19633	1	1	-2.34865
0	46683	FGFR4	hHA039732	129	59	657	526	142	47	0.196347	0	1	-2.34852
0	4886	LOC389276	hHR027158	65	46	331	201	133	7	0.196375	1	0	-2.34832
0	33715	SETD4	hHC015921	93	50	473	328	168	34	0.196617	0	1	-2.34654
0	18274	ANXA7	hCT001121	99	50	503	420	106	49	0.196819	0	1	-2.34506
0	19605	FAM33A	hHC012317	140	51	710	333	397	82	0.197183	1	1	-2.34239
0	29726	DUSP11	hHC017180	127	50	644	478	184	76	0.197205	0	1	-2.34223
0	4444	ZNF294	hHC005558	86	46	436	217	224	40	0.197248	1	1	-2.34192
0	23252	KIF20A	hHC027594	189	56	958	445	503	131	0.197286	1	1	-2.34164
0	14591	TREX2	hHC023284	117	53	593	473	128	60	0.197302	0	1	-2.34152
0	34114	SNF1LK	hHC005853	204	50	1032	697	347	159	0.197674	0	1	-2.3388
0	27050	VCPIP1	hHR009955	138	50	698	531	251	89	0.197708	0	1	-2.33856
0	31237	GRHPR	hHC024344	121	73	612	516	99	43	0.197712	0	1	-2.33852
0	30567	CUL2	hHC015992	171	56	864	318	612	110	0.197917	1	1	-2.33703
0	13817	HGS	hHC024148	120	60	606	448	168	63	0.19802	0	1	-2.33628
0	33648	NCOA4	hHC026109	362	50	1827	473	1454	310	0.198139	1	1	-2.33542
0	31127	PTPN22	hHA040184	128	60	646	597	173	64	0.198142	0	1	-2.33539
0	23433	NEDD4	hHC002142	195	56	983	593	432	135	0.198372	1	1	-2.33372
0	1000	GNPTAB	hHR007669	78	46	393	228	170	30	0.198473	1	1	-2.33298
0	30824	TTLL12	hHR026756	134	50	675	491	204	83	0.198519	0	1	-2.33265
0	22216	NIPBL	hHC024066	82	53	413	338	105	24	0.198547	0	1	-2.33245
0	37595	RPA4	hHC007881	110	47	554	142	412	39	0.198556	1	1	-2.33238
0	19485	DDEFL1	hHC015005	139	66	700	445	269	70	0.198571	1	1	-2.33227
0	12926	CASP4	hHC017176	187	49	941	451	510	101	0.198725	1	1	-2.33116
0	26491	PSCD1	hHC005431	150	49	754	443	316	97	0.198939	1	1	-2.3296
0	34704	C14orf26	hHR006405	55	50	275	177	108	-4	0.2	1	0	-2.32193
0	26881	KIAA1604	hHC008791	133	49	664	423	248	77	0.200301	1	1	-2.31976
0	17334	FLJ20487	hHA035993	84	53	419	315	106	27	0.200477	0	1	-2.31849
0	25700	ASPM	hHC002875	121	47	603	361	260	67	0.200663	1	1	-2.31715
0	19274	LOC402273	hHR026729	104	66	518	380	148	37	0.200772	0	1	-2.31637
0	30877	TAF9B	hHC030872	104	49	518	378	163	45	0.200772	0	1	-2.31637
0	33979	ALKBH3	hHA037425	97	60	483	342	153	33	0.200828	0	1	-2.31597
0	30930	MRPS28	hHC004580	140	56	697	473	235	84	0.200861	0	1	-2.31573
0	26552	BLMH	hHC010627	128	51	637	388	256	72	0.200942	1	1	-2.31515
0	14294	CEBPG	hHR004768	114	51	567	528	122	62	0.201058	0	1	-2.31431
0	29949	SLC29A4	hHC029840	72	46	358	257	115	23	0.201117	0	1	-2.31389
0	27011	LOC285018	hHR001591	105	50	522	318	212	54	0.201149	1	1	-2.31366
0	22615	DNM1L	hHA040566	124	50	616	463	160	73	0.201299	0	1	-2.31259
0	12771	HAGHL	hHA032812	112	49	556	400	161	60	0.201439	0	1	-2.31159
0	14016	NR1D2	hHR004096	158	54	783	460	342	102	0.201788	1	1	-2.30909
0	14578	SLC26A9	hHA038752	88	56	435	397	52	4	0.202299	0	1	-2.30544
0	27130	TAF6	hHC025315	103	50	509	365	191	44	0.202358	0	1	-2.30502
0	37911	UBXD5	hHA039154	66	50	326	200	143	10	0.202454	1	0	-2.30433
0	18155	C9orf109	hHR011957	97	60	479	405	91	19	0.202505	0	1	-2.30397
0	14466	BTN3A2	hHC029152	247	56	1219	423	798	174	0.202625	1	1	-2.30312
0	23223	KIAA0196	hHC002430	150	74	740	447	298	89	0.202703	1	1	-2.30256
0	34434	MKL1	hHC020445	119	53	587	441	155	63	0.202726	0	1	-2.3024
0	18562	TINF2	hHC012641	117	50	577	425	160	63	0.202773	0	1	-2.30206
0	26341	TPM4	hHC031639	160	49	789	586	267	97	0.202788	0	1	-2.30195
0	25631	ATRX	hHR031087	101	46	498	313	207	51	0.202811	1	1	-2.30179
0	14309	LOC285141	hHR010132	71	53	350	231	133	13	0.202857	1	0	-2.30146
0	14416	NUP37	hHC001792	112	50	552	477	124	60	0.202899	0	1	-2.30117
0	29909	MMP14	hHC013712	97	54	478	393	98	40	0.202929	0	1	-2.30095
0	125	MTMR2	hHC002569	78	47	384	193	202	23	0.203125	1	1	-2.29956
0	26953	LOC284233	hHR032215	99	50	487	355	156	44	0.203285	0	1	-2.29842
0	17461	DHX32	hHC010253	74	47	364	227	156	26	0.203297	1	1	-2.29834
0	26854	EVI1	hHC018979	103	47	506	371	148	53	0.203557	0	1	-2.29649
0	14436	EPS15	hHC024256	155	54	761	465	314	100	0.203679	1	1	-2.29563
0	24500	ST8SIA4	hHA033618	76	46	373	146	232	17	0.203753	1	1	-2.2951
0	49735	ARPP-19	hHR028428	107	49	525	206	327	58	0.20381	1	1	-2.29471
0	26623	FLJ13195	hHR026743	101	47	495	342	167	52	0.20404	0	1	-2.29307
0	18457	CCDC28B	hHC019157	136	53	666	483	210	80	0.204204	0	1	-2.29192
0	18225	CLCN2	hHC026837	97	60	475	375	117	36	0.204211	0	1	-2.29187
0	697	OBP2A	hHC031945	84	46	411	272	148	35	0.20438	1	1	-2.29068
0	23680	SLC29A4	hHR029322	128	59	626	361	268	67	0.204473	1	1	-2.29002
0	49710	UBXD1	hHR021432	73	47	357	208	160	23	0.204482	1	1	-2.28996
0	27848	MEP1A	hHC029707	80	66	391	242	199	4	0.204604	1	0	-2.2891
0	18618	PHF20L1	hHC001889	159	54	777	497	301	106	0.204633	1	1	-2.28889
0	25766	PDLIM2	hHA040603	114	47	557	421	149	66	0.204668	0	1	-2.28864
0	9330	STYX	hHC021591	128	50	625	450	233	73	0.2048	0	1	-2.28771
0	14510	PPAP2A	hHA033952	119	50	580	518	140	64	0.205172	0	1	-2.28509
0	31781	CNTF	hHA034592	68	50	331	218	124	4	0.205438	1	0	-2.28322
0	30149	SPATA21	hHC021008	67	49	326	215	123	7	0.205521	1	0	-2.28264
0	26602	PTPN2	hHA033763	137	50	666	490	198	89	0.205706	0	1	-2.28135
0	13386	ITGA3	hHC024280	78	47	379	266	118	30	0.205805	0	1	-2.28065
0	26782	ANKHD1	hHA035875	203	50	986	665	376	151	0.205882	0	1	-2.28011
0	21474	FLJ20323	hHC004314	482	46	2341	141	2208	60	0.205895	1	1	-2.28002
0	33246	LOC389599	hHR027956	90	51	437	158	304	23	0.20595	1	1	-2.27964
0	31166	ZNF292	hHR008996	137	56	665	562	253	77	0.206015	0	1	-2.27918
0	30204	TAPBP	hHC024764	89	50	432	368	69	39	0.206019	0	1	-2.27915
0	14137	MAP3K10	hHA039892	122	56	592	453	145	61	0.206081	0	1	-2.27872
0	31084	CLOCK	hHC006980	108	50	524	348	186	54	0.206107	1	1	-2.27854
0	38193	CD36	hHC016594	58	46	281	165	133	10	0.206406	1	0	-2.27645
0	14188	LDLR	hHC025408	57	50	276	182	103	6	0.206522	1	0	-2.27563
0	30860	KIAA0460	hHC010820	138	51	668	890	222	83	0.206587	0	1	-2.27518
0	31179	NRD1	hHC023480	119	50	576	480	155	64	0.206597	0	1	-2.27511
0	46660	LOC286178	hHC008256	80	51	387	218	194	5	0.206718	1	1	-2.27426
0	31459	CASP2	hHR005048	161	56	778	356	433	100	0.206941	1	1	-2.27271
0	27813	AKAP12	hHC005791	171	56	826	342	518	113	0.207022	1	1	-2.27215
0	22649	LOC130951	hHC018006	145	57	700	523	228	86	0.207143	0	1	-2.2713
0	31652	E2F3	hHC027596	155	56	746	378	366	95	0.207775	1	1	-2.26691
0	15638	C14orf122	hHC023080	112	57	539	375	171	53	0.207792	0	1	-2.26679
0	13811	EBI3	hHC023860	115	50	553	387	181	63	0.207957	0	1	-2.26565
0	44220	FLJ25416	hHC016079	121	50	581	153	431	41	0.208262	1	1	-2.26353
0	17889	WBP11	hHC028373	165	54	792	488	309	109	0.208333	1	1	-2.26303
0	37967	FHL1	hHC024178	139	50	667	431	249	89	0.208396	1	1	-2.2626
0	30279	SIRPB1	hHC025328	107	46	513	303	216	58	0.208577	1	1	-2.26135
0	14415	C4orf16	hHC001780	159	50	762	466	339	106	0.208661	1	1	-2.26076
0	34111	C16orf53	hHC013809	139	46	666	463	215	88	0.208709	0	1	-2.26044
0	34045	UBL5	hHC014097	133	51	637	531	170	79	0.208791	0	1	-2.25987
0	25339	NLGN2	hHC014383	148	50	708	577	291	96	0.20904	0	1	-2.25815
0	12729	CD109	hHR003532	46	44	220	135	97	0	0.209091	1	0	-2.2578
0	29483	LTBP3	hHC022064	73	46	349	240	116	27	0.209169	0	1	-2.25726
0	29472	SCYL3	hHA035708	58	50	277	181	105	6	0.209386	1	0	-2.25576
0	8997	SUPV3L1	hHC017931	98	56	468	355	131	38	0.209402	0	1	-2.25565
0	4415	UBP1	hHC009578	82	44	391	235	160	35	0.209719	1	1	-2.25347
0	49413	PRODH2	hHC022956	73	60	348	192	180	-10	0.20977	1	0	-2.25312
0	756	SH3BP4	hHC006709	85	50	405	300	124	33	0.209877	0	1	-2.25239
0	26980	DDX27	hHC023491	102	49	485	340	160	50	0.210309	0	1	-2.24942
0	39661	LOC440551	hHR028954	169	63	803	138	670	30	0.210461	1	1	-2.24838
0	14211	BRD4	hHA040372	92	51	437	356	94	38	0.210526	0	1	-2.24793
0	31834	ChGn	hHC002156	177	60	840	488	352	111	0.210714	1	1	-2.24664
0	30510	PRSS8	hHC022820	155	60	735	363	375	91	0.210884	1	1	-2.24548
0	18858	CBWD1	hHR030305	102	56	483	377	155	41	0.21118	0	1	-2.24345
0	31007	MSRA	hHC022520	123	51	582	448	157	66	0.21134	0	1	-2.24236
0	13224	RGPD4	hHR030712	181	51	856	517	339	132	0.211449	1	1	-2.24162
0	18186	RBBP8	hHC002273	106	49	501	373	136	64	0.211577	0	1	-2.24075
0	17939	HTR3E	hHC031541	142	54	670	486	213	89	0.21194	0	1	-2.23827
0	29710	DCTN6	hHR012188	161	46	759	448	314	114	0.212121	1	1	-2.23704
0	26753	C1orf71	hHR003031	229	51	1079	623	468	183	0.212234	1	1	-2.23628
0	14380	SETD4	hHR023488	114	56	537	452	109	55	0.212291	0	1	-2.23589
0	13961	C13orf3	hHC012244	171	50	805	575	338	121	0.212422	0	1	-2.23499
0	31265	GSTA1	hHC029144	7936	51	37332	663	36767	439	0.212579	1	1	-2.23393
0	18023	TICAM1	hHA032885	127	54	597	467	171	69	0.21273	0	1	-2.2329
0	16829	GRK4	hHC016397	129	51	606	422	191	72	0.212871	0	1	-2.23195
0	18192	C21orf33	hHC011393	114	66	535	496	137	47	0.213084	0	1	-2.23051
0	10390	IMPA2	hHC023199	108	54	506	398	128	50	0.213439	0	1	-2.22811
0	4466	MYO9B	hHR018134	60	50	281	185	131	7	0.213523	1	0	-2.22754
0	34334	LOC441627	hHR023709	145	54	678	515	185	80	0.213864	0	1	-2.22523
0	17973	CTNS	hHC002453	95	46	444	370	96	43	0.213964	0	1	-2.22456
0	22711	PLRG1	hHC010230	112	46	523	283	257	67	0.214149	1	1	-2.22331
0	4820	CBWD2	hHR030518	176	56	821	620	208	117	0.214373	0	1	-2.22181
0	25913	ZNF197	hHC008911	121	50	564	436	141	71	0.214539	0	1	-2.22069
0	18493	USP6NL	hHR004757	102	50	475	321	163	46	0.214737	0	1	-2.21936
0	31240	GABPA	hHR024452	169	51	787	457	361	118	0.21474	1	1	-2.21934
0	4963	SLC41A1	hHC001706	75	49	349	180	189	25	0.2149	1	1	-2.21826
0	30272	TXNDC14	hHA033404	71	44	330	235	102	23	0.215152	0	1	-2.21658
0	18265	ATG7	hHR011093	126	76	585	508	89	64	0.215385	0	1	-2.21501
0	23830	LOC388623	hHR023466	92	51	427	245	192	38	0.215457	1	1	-2.21453
0	22493	GSTA4	hHC013974	113	56	524	466	77	55	0.215649	0	1	-2.21324
0	26841	C1orf123	hHC015319	190	53	880	670	259	137	0.215909	0	1	-2.2115
0	31621	SEC22L2	hHC002336	139	56	643	313	323	77	0.216174	1	1	-2.20973
0	42091	GPR89A	hHC031667	82	46	379	267	186	30	0.216359	0	1	-2.2085
0	10146	LOC442544	hHR027999	95	53	439	358	91	41	0.216401	0	1	-2.20822
0	34781	CCDC66	hHC003609	185	53	853	363	513	130	0.216882	1	1	-2.20502
0	14484	OGDH	hHC020416	113	56	521	413	115	54	0.216891	0	1	-2.20496
0	26837	ALS2CR16	hHC015127	127	53	585	483	128	73	0.217094	0	1	-2.20361
0	18004	LOC389831	hHR026177	121	47	557	378	195	76	0.217235	0	1	-2.20267
0	31202	DGCR14	hHC021092	127	50	583	370	231	73	0.217839	1	1	-2.19867
0	13866	SPATS2	hHC009568	136	51	624	526	186	88	0.217949	0	1	-2.19794
0	31254	KRT18	hHR024740	108	56	495	328	190	48	0.218182	1	1	-2.1964
0	18368	ANKHD1	hHR006017	182	56	834	452	396	124	0.218225	1	1	-2.19611
0	26981	CD82	hHC023575	109	49	499	328	187	57	0.218437	1	1	-2.19471
0	21996	LATS2	hHC007482	123	51	563	306	295	60	0.218472	1	1	-2.19448
0	26985	TUSC2	hHC023767	80	49	366	253	131	27	0.218579	0	1	-2.19377
0	26804	CD274	hHC022339	103	51	471	355	120	35	0.218684	0	1	-2.19308
0	14332	LOC440713	hHR026944	91	54	416	342	86	35	0.21875	0	1	-2.19265
0	631	SNRPB2	hHR008809	85	50	388	268	125	7	0.219072	0	1	-2.19052
0	26214	LYN	hHC005275	250	51	1140	571	565	196	0.219298	1	1	-2.18903
0	12736	FAM76B	hHC003832	102	54	465	355	114	49	0.219355	0	1	-2.18866
0	23799	RHCE	hHC031998	104	54	474	288	201	43	0.219409	1	1	-2.1883
0	31074	LOC440717	hHR030692	112	63	510	338	182	43	0.219608	1	1	-2.187
0	31149	THOC3	hHC032024	207	51	942	440	524	155	0.219745	1	1	-2.1861
0	22114	QIL1	hHC023010	140	51	637	278	369	83	0.21978	1	1	-2.18587
0	18276	LOC402457	hHR030785	157	49	714	416	307	110	0.219888	1	1	-2.18516
0	21631	STXBP1	hHC008814	103	51	468	320	176	52	0.220085	0	1	-2.18386
0	33956	TMEM42	hHC021309	161	54	731	582	185	97	0.220246	0	1	-2.18281
0	29819	TBP	hCM000944	95	50	431	357	80	39	0.220418	0	1	-2.18169
0	26943	RAP1B	hHC027895	107	47	485	363	138	22	0.220619	0	1	-2.18037
0	29425	PLEKHA4	hHC016208	191	49	865	558	314	142	0.220809	1	1	-2.17913
0	4703	ALCAM	hHC003050	298	50	1347	575	802	246	0.221232	1	1	-2.17637
0	44997	RAC1	hHA032291	114	50	515	151	367	24	0.221359	1	1	-2.17554
0	27364	FAM83A	hHR022987	151	57	682	357	322	89	0.221408	1	1	-2.17522
0	12328	LOC285770	hHR017295	64	50	289	138	161	3	0.221453	1	0	-2.17493
0	31380	PARP6	hHC021572	171	57	772	416	356	112	0.221503	1	1	-2.1746
0	19873	ASB16	hHC019421	161	59	726	390	331	95	0.221763	1	1	-2.17291
0	26616	EDIL3	hHR004099	246	49	1109	346	803	194	0.221821	1	1	-2.17253
0	18995	LOC349114	hHC031805	142	57	640	483	162	84	0.221875	0	1	-2.17218
0	35343	RNU71B	hHR027897	73	53	329	218	157	3	0.221884	1	0	-2.17212
0	30925	RAPH1	hHR004376	840	56	3785	655	3249	780	0.221929	1	1	-2.17183
0	33760	SIGLECP1	hHR026493	89	46	401	248	168	38	0.221945	1	1	-2.17172
0	13666	ZC3H7A	hHC018784	117	56	527	281	276	55	0.222011	1	1	-2.17129
0	13835	C3	hHC020020	137	47	617	472	184	89	0.222042	0	1	-2.17109
0	27122	DPP3	hHA033379	114	50	513	363	161	63	0.222222	0	1	-2.16993
0	31118	ZNF226	hHA035108	139	50	625	471	179	93	0.2224	0	1	-2.16877
0	27048	PC	hHC009859	142	50	638	475	198	89	0.222571	0	1	-2.16767
0	27038	LOC134505	hHR024355	133	50	597	422	180	76	0.222781	0	1	-2.1663
0	26848	BDNF	hHC017923	134	53	600	425	197	83	0.223333	0	1	-2.16273
0	17928	RDH13	hHC019841	197	53	882	528	374	143	0.223356	1	1	-2.16258
0	26674	ANXA7	hCT001123	80	47	358	305	58	30	0.223464	0	1	-2.16189
0	22078	MDC1	hHC016290	110	53	492	428	139	53	0.223577	0	1	-2.16115
0	13837	ERCC1	hHC020116	161	50	720	448	294	106	0.223611	1	1	-2.16094
0	30180	DDO	hHC017468	79	50	353	243	118	14	0.223796	0	1	-2.15974
0	27109	NPHP1	hHA033943	166	50	741	500	263	111	0.224022	0	1	-2.15829
0	26755	KIAA1698	hHC013495	165	50	736	450	299	116	0.224185	1	1	-2.15724
0	31036	FLJ22222	hHC015044	139	50	620	448	188	93	0.224194	0	1	-2.15718
0	13096	ARIH2	hHC015736	142	50	633	423	236	93	0.224329	0	1	-2.15631
0	23043	C1orf156	hHC007350	182	49	811	543	325	131	0.224414	0	1	-2.15576
0	22002	CNTNAP3B	hHR030042	75	59	334	218	119	17	0.224551	1	0	-2.15489
0	29643	RCHY1	hHR005552	73	41	325	258	77	28	0.224615	0	1	-2.15447
0	30599	FLJ30313	hHC027512	102	50	454	242	246	53	0.22467	1	1	-2.15412
0	17273	POLK	hHR004301	150	63	667	380	297	86	0.224888	1	1	-2.15272
0	43003	ATP5G2	hHC030131	191	54	849	545	341	130	0.224971	1	1	-2.15219
0	12857	CEP55	hHC003148	191	50	848	463	395	139	0.225236	1	1	-2.15049
0	26877	LOC253842	hHR008599	118	50	523	412	121	64	0.225621	0	1	-2.14802
0	38136	TANK	hHC002302	133	50	589	438	156	81	0.225806	0	1	-2.14684
0	12715	MRPL27	hHC015916	140	56	620	448	207	83	0.225806	0	1	-2.14684
0	22540	SCAMP3	hHC015426	159	51	704	526	187	109	0.225852	0	1	-2.14655
0	25293	MGC14327	hHR031759	87	46	385	273	117	40	0.225974	0	1	-2.14577
0	4802	P4HA2	hHC018902	88	44	389	272	121	42	0.226221	0	1	-2.14419
0	21430	DYNC1I2	hHC031002	117	46	517	372	179	67	0.226306	0	1	-2.14366
0	578	CTA-126B4.3	hHR029269	75	46	331	158	188	30	0.226586	1	1	-2.14187
0	41311	TIGD4	hHC003850	141	46	622	153	476	57	0.226688	1	1	-2.14122
0	29496	DKFZp434N062	hHC031868	95	50	419	298	124	43	0.22673	0	1	-2.14095
0	4238	C17orf40	hHC028310	83	46	366	228	143	37	0.226776	1	1	-2.14066
0	30163	BTBD1	hHC001712	135	46	595	381	217	87	0.226891	1	1	-2.13993
0	39820	PLEKHG4	hHC019270	86	63	379	143	239	-3	0.226913	1	0	-2.13979
0	42873	PHF1	hHR025043	180	50	793	531	285	123	0.226986	0	1	-2.13932
0	29320	TMC2	hHC019219	100	54	440	150	297	22	0.227273	1	1	-2.1375
0	38167	TMEM23	hHC004210	173	51	761	583	339	119	0.227332	0	1	-2.13712
0	34699	ATP8A1	hHC006201	73	50	321	195	138	13	0.227414	1	0	-2.1366
0	8546	CA13	hHC027351	94	51	413	258	168	42	0.227603	1	1	-2.13541
0	33038	GAD1	hHA039860	112	56	492	152	344	27	0.227642	1	1	-2.13516
0	30910	GEMIN5	hHC008228	203	50	891	485	411	147	0.227834	1	1	-2.13395
0	34953	KIAA0355	hHC010713	124	50	544	432	124	73	0.227941	0	1	-2.13327
0	31464	DKFZp779O175	hHR005252	150	59	658	353	310	84	0.227964	1	1	-2.13313
0	30047	USP40	hHR004976	145	51	636	423	236	93	0.227987	1	1	-2.13297
0	30841	LOC137886	hHC028760	91	49	399	250	163	35	0.22807	1	1	-2.13245
0	4913	DMTF1	hHC008906	92	51	403	233	176	38	0.228288	1	1	-2.13107
0	30939	RAB36	hHC015416	150	50	657	500	166	77	0.228311	0	1	-2.13093
0	9818	TBC1D12	hHR004191	95	57	416	241	179	37	0.228365	1	1	-2.13058
0	7189	C6orf160	hHO048026	263	46	1151	123	1030	214	0.228497	1	1	-2.12975
0	938	CAPN1	hHC023125	76	46	332	252	95	27	0.228916	0	1	-2.12711
0	35012	KLHL24	hHR003909	153	50	668	440	242	101	0.229042	1	1	-2.12632
0	13912	POT1	hHC003328	85	51	371	228	153	32	0.229111	1	1	-2.12588
0	17197	ARHGEF4	hHC016781	105	46	458	265	203	57	0.229258	1	1	-2.12496
0	30758	PCDHGB1	hHR012068	151	50	658	360	312	99	0.229483	1	1	-2.12354
0	26869	FAM60A	hHR030487	154	50	671	472	220	109	0.229508	0	1	-2.12338
0	27245	SPATA13	hHC007447	173	51	753	357	401	123	0.229748	1	1	-2.12188
0	19748	KIAA1430	hHR008009	247	56	1075	423	652	210	0.229767	1	1	-2.12175
0	34158	NR1H2	hHC022557	151	50	657	425	245	93	0.229833	1	1	-2.12134
0	23019	C9orf91	hHC019254	92	50	400	300	109	29	0.23	0	1	-2.12029
0	13137	FOXRED1	hHC025420	143	50	621	458	178	77	0.230274	0	1	-2.11858
0	26137	CLMN	hHC023119	82	46	356	252	111	33	0.230337	0	1	-2.11818
0	13764	RNU50	hHR015808	212	51	920	126	798	159	0.230435	1	1	-2.11757
0	27123	C14orf70	hHC025015	137	49	594	355	249	84	0.23064	1	1	-2.11629
0	25705	C12orf29	hHC013519	256	49	1109	538	568	201	0.230839	1	1	-2.11504
0	33629	PILRB	hHC016401	6273	63	27131	372	26785	4291	0.231212	1	1	-2.11271
0	12738	C6orf52	hHR014296	367	54	1587	436	1174	69	0.231254	1	1	-2.11245
0	30803	TBC1D10C	hHC021176	87	56	376	342	66	7	0.231383	0	1	-2.11165
0	30150	LOC401400	hHR021020	88	56	380	248	140	14	0.231579	1	1	-2.11042
0	17938	FLJ20489	hHC022241	166	54	716	552	220	110	0.231844	0	1	-2.10878
0	25695	TLK1	hHC015727	94	46	405	283	135	43	0.232099	0	1	-2.10719
0	26581	FLJ13611	hHC002071	106	49	456	338	139	54	0.232456	0	1	-2.10497
0	21661	SPIRE1	hHC010254	123	46	529	288	263	74	0.232514	1	1	-2.10461
0	34117	PARVA	hHC006033	160	47	688	465	273	112	0.232558	0	1	-2.10434
0	26408	LOC345375	hHR026371	97	49	417	317	114	47	0.232614	0	1	-2.10399
0	17434	MGEA5	hHC007001	61	51	262	168	101	8	0.232824	1	0	-2.10269
0	26160	RBM22	hHC013435	172	50	738	506	273	119	0.233062	0	1	-2.10121
0	9108	OBFC1	hHC012471	93	50	399	295	108	41	0.233083	0	1	-2.10109
0	26820	HMBS	hCP000451	125	53	536	380	165	68	0.233209	0	1	-2.1003
0	31420	MGC40405	hHC019268	154	50	659	416	256	101	0.233687	1	1	-2.09735
0	26882	SIAH2	hHC008803	120	47	513	382	138	73	0.233918	0	1	-2.09592
0	18728	CARHSP1	hHC025217	194	51	829	518	318	139	0.234017	1	1	-2.09532
0	27905	ITGB5	hHC019039	158	60	675	458	224	91	0.234074	0	1	-2.09496
0	30706	DNAJB2	hHA038372	162	54	692	482	219	107	0.234104	0	1	-2.09478
0	18563	LOC92689	hHC008885	119	50	508	388	128	71	0.234252	0	1	-2.09387
0	12688	VARS	hHC022264	134	51	572	396	197	82	0.234266	0	1	-2.09378
0	18350	ECT2	hHC002849	534	51	2279	467	1831	480	0.234313	1	1	-2.09349
0	21421	B2M	hCM001038	86	50	367	296	84	33	0.234332	0	1	-2.09337
0	30539	LOC388467	hHR031544	91	56	388	238	171	37	0.234536	1	1	-2.09212
0	26394	TENC1	hHC014563	251	50	1069	508	571	216	0.234799	1	1	-2.0905
0	32011	PKN2	hHC013760	208	56	885	451	467	144	0.235028	1	1	-2.08909
0	18026	PRPF4B	hHA032993	181	59	770	526	277	120	0.235065	0	1	-2.08887
0	12830	FAM103A1	hHC031384	130	50	553	473	141	77	0.235081	0	1	-2.08877
0	9201	HBZ	hHC024651	119	50	506	328	183	67	0.235178	1	1	-2.08818
0	26259	CYP2C19	hHC018487	94	54	399	295	111	32	0.235589	0	1	-2.08566
0	29702	ZNF217	hHC010652	139	43	590	258	347	93	0.235593	1	1	-2.08563
0	17885	RBL2	hHC028181	144	50	611	356	260	90	0.235679	1	1	-2.0851
0	13836	REEP4	hHC020032	157	50	666	533	226	109	0.235736	0	1	-2.08476
0	25661	SPG21	hHC008335	179	46	759	392	476	131	0.235837	1	1	-2.08414
0	13047	MGC16028	hHC014188	138	50	585	458	137	86	0.235897	0	1	-2.08377
0	29836	DGAT2	hHC012860	139	46	589	372	223	94	0.235993	1	1	-2.08318
0	30593	C6orf89	hHC014552	233	76	987	597	427	161	0.236069	1	1	-2.08272
0	22292	DOCK4	hHC005442	112	50	474	288	207	57	0.236287	1	1	-2.08139
0	32372	ZFYVE9	hHA033356	168	59	710	397	335	104	0.23662	1	1	-2.07936
0	50114	FLJ21908	hHC001656	84	66	355	208	154	-3	0.23662	1	0	-2.07936
0	41435	CDYL	hHA039754	134	46	566	148	418	57	0.236749	1	1	-2.07857
0	34662	SERPINA1	hHC018597	211	54	891	402	485	156	0.236813	1	1	-2.07818
0	14236	SPATA5L1	hHC015040	191	57	806	551	359	136	0.236973	0	1	-2.07721
0	22261	WDR37	hHC009366	92	46	388	253	155	45	0.237113	1	1	-2.07635
0	25544	C10orf56	hHC011515	125	46	527	266	267	77	0.237192	1	1	-2.07587
0	13775	TTC1	hHC002548	139	50	586	496	131	90	0.237201	0	1	-2.07582
0	4351	ADH5	hHR027626	93	46	392	250	157	47	0.237245	1	1	-2.07555
0	29523	LYCAT	hHC002480	107	43	451	260	201	61	0.237251	1	1	-2.07552
0	29958	C4BPB	hHC022556	126	46	531	396	141	77	0.237288	0	1	-2.07529
0	18550	MAD1L1	hHC032033	164	50	691	483	220	110	0.237337	0	1	-2.07499
0	25358	LOC200609	hHR026395	76	47	320	285	54	26	0.2375	0	1	-2.074
0	18713	PTPN22	hHA034133	110	70	463	378	101	36	0.237581	0	1	-2.07351
0	43898	TLR5	hHC008039	100	56	420	133	294	10	0.238095	1	1	-2.07039
0	22366	APP	hCT001314	105	54	441	286	163	42	0.238095	1	1	-2.07039
0	29941	COTL1	hHR025616	75	43	315	168	152	31	0.238095	1	1	-2.07039
0	46593	EI24	hHR016596	139	53	583	391	226	80	0.238422	0	1	-2.06841
0	9819	LOC390908	hHR026547	74	57	310	195	117	12	0.23871	1	0	-2.06667
0	31835	NANOS1	hHC002240	158	56	661	340	353	100	0.239032	1	1	-2.06473
0	26809	KIAA0690	hHC022615	185	51	773	502	295	135	0.239327	1	1	-2.06294
0	31083	CHURC1	hHC006968	122	50	509	338	173	67	0.239686	1	1	-2.06078
0	13097	RNF103	hHC002764	165	47	688	458	283	117	0.239826	1	1	-2.05994
0	27305	TBP	hCP000223	148	57	617	253	377	92	0.23987	1	1	-2.05967
0	24094	VNN1	hHC007338	125	54	521	287	253	69	0.239923	1	1	-2.05936
0	13034	CTDSPL2	hHC012760	66	46	275	158	137	13	0.24	1	0	-2.05889
0	31095	YTHDF3	hHC004856	181	51	754	463	316	128	0.240053	1	1	-2.05857
0	42974	GAST	hHC019487	158	94	658	586	88	29	0.240122	0	1	-2.05816
0	34407	ERF	hHC024945	150	57	624	480	167	87	0.240385	0	1	-2.05658
0	23226	PSMD5	hHC002538	204	54	848	511	350	147	0.240566	1	1	-2.0555
0	45826	KHK	hHA040055	83	54	345	193	162	6	0.24058	1	1	-2.05541
0	23738	ANKDD1A	hHC007146	161	59	669	388	289	100	0.240658	1	1	-2.05495
0	34480	NUP160	hHC025341	187	50	777	436	364	136	0.240669	1	1	-2.05488
0	23054	UHRF1	hHR030114	364	54	1511	285	1240	307	0.2409	1	1	-2.05349
0	31130	HPCAL1	hHA040292	406	51	1685	411	1313	278	0.24095	1	1	-2.0532
0	30710	KIAA1961	hHC003236	114	56	473	300	180	57	0.241015	1	1	-2.05281
0	34292	C14orf83	hHC027837	189	51	784	525	286	133	0.241071	0	1	-2.05247
0	18440	LOC339903	hHR015233	137	50	568	468	121	89	0.241197	0	1	-2.05172
0	30933	SLC25A24	hHA039704	100	50	414	258	161	33	0.241546	1	1	-2.04963
0	19714	LOC440245	hHR029033	179	53	741	467	283	126	0.241565	1	1	-2.04951
0	13838	NOMO1	hHR020128	216	50	894	577	442	170	0.241611	1	1	-2.04924
0	8941	DHX8	hHC025611	110	54	455	353	102	6	0.241758	0	1	-2.04836
0	34472	SRP19	hHA033405	156	47	645	493	169	106	0.24186	0	1	-2.04775
0	11596	ADRA1B	hHC025935	82	43	339	125	217	17	0.241888	1	1	-2.04759
0	22595	IK	hHR029622	135	63	558	433	137	70	0.241935	0	1	-2.04731
0	34043	KLK1	hHC014001	98	50	405	393	49	10	0.241975	0	1	-2.04707
0	26728	DNAJC19	hHC004483	141	51	581	436	184	92	0.242685	0	1	-2.04284
0	34479	LSM6	hHR025329	125	49	515	423	113	74	0.242718	0	1	-2.04264
0	26982	MEF2B	hHC023587	117	50	482	347	154	64	0.242739	0	1	-2.04252
0	33674	POGZ	hHC019677	154	46	634	362	283	100	0.242902	1	1	-2.04155
0	9814	RDH14	hHC003999	139	70	572	405	184	70	0.243007	0	1	-2.04093
0	13221	TOP1	hHC030604	157	50	646	481	196	104	0.243034	0	1	-2.04077
0	23801	LOC375133	hHR032094	143	56	588	268	335	84	0.243197	1	1	-2.0398
0	30889	LOC283680	hHR013016	179	53	736	825	278	124	0.243207	0	1	-2.03975
0	26530	ERCC1	hHA037987	99	50	407	321	104	47	0.243243	0	1	-2.03953
0	26318	FLJ11806	hHA035491	99	50	407	295	119	41	0.243243	0	1	-2.03953
0	34299	CGB2	hHC032049	152	67	624	608	46	9	0.24359	0	1	-2.03747
0	22425	LOC124216	hHR026838	90	51	369	296	84	35	0.243902	0	1	-2.03562
0	34366	WWC1	hHC001821	152	51	623	460	185	95	0.243981	0	1	-2.03516
0	22196	C12orf29	hHR027330	161	50	659	471	211	110	0.24431	0	1	-2.03322
0	4463	FAM62B	hHC003434	325	54	1330	728	632	273	0.244361	1	1	-2.03291
0	25448	POLR3GL	hHC005755	89	50	364	286	86	36	0.244505	0	1	-2.03206
0	12889	CTDSP1	hHA036940	191	50	781	443	378	150	0.244558	1	1	-2.03175
0	26435	USP7	hHC020023	173	66	707	452	259	103	0.244696	1	1	-2.03094
0	30218	SIVA	hHA039260	109	49	444	308	146	55	0.245495	0	1	-2.02623
0	30093	HSPC023	hHC027920	82	43	334	225	116	36	0.245509	0	1	-2.02615
0	48597	C20orf152	hHC010404	100	47	407	147	265	23	0.2457	1	1	-2.02503
0	14090	C3orf33	hHC013024	178	59	724	463	266	114	0.245856	1	1	-2.02411
0	31257	SGTA	hHC024920	149	54	606	345	274	96	0.245875	1	1	-2.02401
0	30934	C21orf58	hHA039716	105	49	427	285	149	47	0.245902	0	1	-2.02385
0	22644	NUAK1	hHC017730	182	53	740	457	289	128	0.245946	1	1	-2.02359
0	22186	ZNF482	hHC003810	131	50	532	306	232	76	0.246241	1	1	-2.02186
0	30407	ANP32A	hHC030320	119	50	483	443	120	64	0.246377	0	1	-2.02106
0	33655	FLJ21986	hHC006513	87	50	353	243	126	30	0.246459	0	1	-2.02058
0	9968	BIVM	hHC006015	103	56	417	293	155	45	0.247002	0	1	-2.0174
0	26326	HSA251708	hHR019747	84	50	340	236	119	34	0.247059	0	1	-2.01707
0	19335	ZNF248	hHC012797	128	60	518	321	217	64	0.247104	1	1	-2.01681
0	18273	SDHA	hCM001109	136	47	550	417	165	86	0.247273	0	1	-2.01582
0	26937	ZC3HAV1	hHR027223	138	49	558	413	147	87	0.247312	0	1	-2.0156
0	13104	KIAA0692	hHR003064	213	50	860	500	394	163	0.247674	1	1	-2.01348
0	18193	CRY2	hHC011477	148	49	597	437	222	94	0.247906	0	1	-2.01213
0	30818	DNAJC16	hHR004196	121	50	488	357	137	73	0.247951	0	1	-2.01187
0	13353	ANAPC10	hHC006604	96	56	387	277	116	40	0.248062	0	1	-2.01123
0	38012	C3orf38	hHC009406	69	54	278	183	107	5	0.248201	1	0	-2.01042
0	18018	TPP1	hHR024161	237	51	954	463	521	186	0.248428	1	1	-2.0091
0	4743	MAPBPIP	hHC025706	79	44	318	232	90	32	0.248428	0	1	-2.0091
0	10120	ANKHD1	hHA035199	142	56	571	326	271	85	0.248687	1	1	-2.0076
0	22059	C6orf129	hHC018486	142	50	571	398	179	84	0.248687	0	1	-2.0076
0	34296	LOC441050	hHR028029	192	64	772	586	199	126	0.248705	0	1	-2.00749
0	26321	CHEK2	hHA035671	96	63	386	320	74	31	0.248705	0	1	-2.00749
0	31717	IL1RN	hHC014624	108	56	434	280	167	51	0.248848	1	1	-2.00666
0	31158	VDR	hHR012452	271	51	1089	386	718	222	0.248852	1	1	-2.00664
0	31085	LOC202451	hHR007064	163	49	655	398	282	114	0.248855	1	1	-2.00662
0	18091	LOC92482	hHR005429	114	50	458	352	126	57	0.248908	0	1	-2.00631
0	30040	MAPKAP1	hHC007292	131	46	526	323	220	81	0.249049	1	1	-2.0055
0	13010	LETMD1	hHC010840	240	50	963	466	512	190	0.249221	1	1	-2.0045
0	30039	MAP3K7	hHC007280	107	43	429	253	181	64	0.249417	1	1	-2.00337
0	22587	ARL16	hHR025398	147	56	589	525	89	90	0.249576	0	1	-2.00245
0	19564	TSC22D4	hHC010313	224	54	897	650	279	169	0.249721	0	1	-2.00161
0	26300	NEK6	hHC006211	170	51	680	448	248	118	0.25	1	1	-2
0	48249	PHACTR4	hHC007644	64	50	256	156	106	0	0.25	1	0	-2
0	27700	ZNF75	hHR016843	108	54	432	313	139	49	0.25	0	1	-2
0	13911	ANKRD12	hHC003316	181	51	723	228	500	126	0.250346	1	1	-1.99801
0	30457	HMBS	hCP000344	120	53	479	333	151	63	0.250522	0	1	-1.99699
0	27488	AIFL	hHC020107	96	51	383	235	207	42	0.250653	1	1	-1.99624
0	34951	KIAA1450	hHR010617	189	56	754	491	276	128	0.250663	1	1	-1.99618
0	8668	IKBKE	hHC018231	93	54	371	272	101	39	0.250674	0	1	-1.99612
0	34093	ZNF331	hHC015633	85	46	339	257	103	34	0.250737	0	1	-1.99575
0	26593	MAPK14	hHC011479	134	50	534	360	191	73	0.250936	0	1	-1.99461
0	23464	C14orf103	hHC003978	197	56	785	473	354	131	0.250955	1	1	-1.9945
0	9353	FLJ20035	hHC013131	128	53	510	358	157	71	0.25098	0	1	-1.99435
0	27009	LOC56930	hHC006871	155	49	617	348	274	104	0.251216	1	1	-1.993
0	18259	C9orf90	hHC010805	150	49	597	450	169	102	0.251256	0	1	-1.99277
0	25773	GSN	hCT000655	82	51	326	263	74	28	0.251534	0	1	-1.99118
0	30579	DENND4A	hHC003512	162	47	644	332	323	106	0.251553	1	1	-1.99107
0	26682	KIAA1143	hHC031075	159	50	632	312	329	109	0.251582	1	1	-1.9909
0	34063	XRCC2	hHC008433	84	47	333	265	82	23	0.252252	0	1	-1.98706
0	29755	KIAA0329	hHC021296	167	51	662	1446	179	115	0.252266	0	1	-1.98698
0	14152	SCYL2	hHC002944	201	56	796	342	458	143	0.252513	1	1	-1.98557
0	26709	ZFYVE26	hHC008215	174	50	689	372	328	119	0.25254	1	1	-1.98542
0	18188	CECR5	hHC011201	99	47	392	333	94	39	0.252551	0	1	-1.98535
0	29447	LOC402778	hHC026096	73	46	289	178	121	23	0.252595	1	1	-1.9851
0	29841	OTUD7	hHC013904	1389	53	5496	585	4919	183	0.252729	1	1	-1.98434
0	42976	FLJ11021	hHC019583	254	111	1004	576	478	118	0.252988	1	1	-1.98286
0	23557	CCNT2	hHC008094	208	63	822	425	399	143	0.253041	1	1	-1.98255
0	25351	MRPL11	hHC027631	82	46	324	251	82	34	0.253086	0	1	-1.9823
0	4296	RPL7L1	hHC031862	102	46	403	266	142	55	0.253102	1	1	-1.98221
0	12843	GABPB2	hHR005548	81	46	320	260	79	33	0.253125	0	1	-1.98208
0	18182	MPDZ	hHC002081	132	50	521	482	133	80	0.253359	0	1	-1.98075
0	34032	PLCXD1	hHR031101	106	54	418	305	123	49	0.253589	0	1	-1.97944
0	22684	TP53INP1	hHC006978	119	50	469	218	286	63	0.253731	1	1	-1.97863
0	17991	MGC16121	hHR014453	165	54	650	472	203	109	0.253846	0	1	-1.97797
0	9062	HEG1	hHR010263	113	47	445	258	193	62	0.253933	1	1	-1.97748
0	32288	C4A	hHC024332	145	53	571	252	331	91	0.25394	1	1	-1.97744
0	9751	SCYL3	hHC010611	142	56	559	398	171	83	0.254025	0	1	-1.97696
0	34464	STAT1	hHA034173	167	50	657	458	211	117	0.254186	0	1	-1.97605
0	13869	UMPS	hHC014740	185	53	727	562	250	130	0.25447	0	1	-1.97443
0	32080	FAM58B	hHR029324	109	60	428	283	156	51	0.254673	1	1	-1.97328
0	25617	TLN1	hCT000847	246	50	965	631	339	193	0.254922	1	1	-1.97187
0	34335	DPP7	hHC023793	177	56	694	543	187	113	0.255043	0	1	-1.97119
0	26292	ATXN7L2	hHC025795	110	49	431	272	163	58	0.25522	1	1	-1.97018
0	29658	LRRC47	hHC003164	183	50	716	353	371	130	0.255587	1	1	-1.96812
0	29551	ANP32B	hHR027632	89	43	348	223	138	43	0.255747	1	1	-1.96721
0	8988	DIAPH1	hHR015159	98	50	383	261	125	46	0.255875	0	1	-1.96649
0	34607	RBM8A	hHR030321	167	56	651	587	233	107	0.256528	0	1	-1.96281
0	30666	ST5	hHC009572	168	51	654	365	312	112	0.256881	1	1	-1.96083
0	38320	HDHD2	hHC006142	168	57	654	397	267	103	0.256881	1	1	-1.96083
0	26912	C10orf118	hHR010243	158	47	615	368	258	112	0.256911	1	1	-1.96066
0	25321	PRKCA	hHR002383	123	44	478	231	252	79	0.257322	1	1	-1.95835
0	38259	LOC283378	hHR008242	139	56	540	383	160	78	0.257407	0	1	-1.95787
0	14334	SMURF2	hHC027040	95	56	369	300	81	37	0.257453	0	1	-1.95762
0	27551	LHX6	hHA038143	94	56	365	241	155	31	0.257534	1	1	-1.95716
0	14289	CRAMP1L	hHC007252	185	51	718	543	227	132	0.25766	0	1	-1.95646
0	25706	CRYZL1	hHC013531	159	49	617	445	180	105	0.257699	0	1	-1.95624
0	31861	SGK3	hHR003872	158	56	613	387	257	97	0.257749	1	1	-1.95596
0	30463	ZNF622	hHC018680	124	50	481	312	188	66	0.257796	1	1	-1.9557
0	13314	SPIN	hHC008920	304	51	1179	577	606	255	0.257846	1	1	-1.95542
0	19268	LOC202781	hHR004169	180	60	698	506	197	124	0.25788	0	1	-1.95523
0	30490	FNBP1L	hHC028388	179	50	694	322	381	124	0.257925	1	1	-1.95498
0	26665	CEBPG	hHC011095	162	53	628	468	176	107	0.257962	0	1	-1.95477
0	30808	MMP14	hHR021380	250	64	969	647	402	187	0.257998	0	1	-1.95457
0	13801	C17orf39	hHC027604	208	49	806	496	378	160	0.258065	1	1	-1.9542
0	31213	PPP3CB	hHC001688	219	51	848	466	395	170	0.258255	1	1	-1.95313
0	9408	TRND	hHR030327	170	50	658	340	326	121	0.258359	1	1	-1.95255
0	25792	SFRS10	hHC015355	159	56	615	468	150	104	0.258537	0	1	-1.95156
0	15241	CNN2	hHR025564	124	56	479	243	242	67	0.258873	1	1	-1.94969
0	16614	FBXO8	hHA034096	108	56	417	150	271	30	0.258993	1	1	-1.94902
0	33735	PLEKHH2	hHC003825	107	47	413	312	110	56	0.25908	0	1	-1.94853
0	23767	TANK	hHA035070	173	57	667	373	296	113	0.25937	1	1	-1.94691
0	14114	SNX1	hHR008416	170	56	655	467	217	111	0.259542	0	1	-1.94596
0	12721	C20orf12	hHC002380	74	46	285	263	27	1	0.259649	0	1	-1.94536
0	22898	ZFP36L2	hHC008034	185	50	712	483	246	129	0.259831	0	1	-1.94435
0	29993	VPS26B	hHR017744	171	50	658	440	228	120	0.259878	0	1	-1.94409
0	30491	C16orf9	hHC025784	172	49	661	361	309	117	0.260212	1	1	-1.94224
0	19832	DNTTIP1	hHC021641	156	56	599	453	171	100	0.260434	0	1	-1.94101
0	31209	ARNTL2	hHR006872	154	50	591	500	153	99	0.260575	0	1	-1.94023
0	14283	CCNG1	hHR006964	326	53	1251	568	783	273	0.260592	1	1	-1.94014
0	10327	BRE	hHC025203	116	50	445	366	90	64	0.260674	0	1	-1.93968
0	29485	DDAH2	hHC022160	253	66	970	665	302	188	0.260825	0	1	-1.93885
0	22672	ZNF443	hHR030594	174	50	667	488	242	120	0.26087	0	1	-1.9386
0	30994	FANCA	hHC025700	125	54	479	315	173	66	0.26096	1	1	-1.9381
0	4747	TPM4	hHR029738	122	47	467	313	184	76	0.261242	0	1	-1.93654
0	14449	VEGF	hHR009940	156	54	596	528	94	109	0.261745	0	1	-1.93377
0	23948	KIAA1586	hHC008010	178	54	680	235	462	126	0.261765	1	1	-1.93366
0	17550	LOC400843	hHR021017	99	63	378	296	110	31	0.261905	0	1	-1.93289
0	9160	MPP5	hHR006903	203	50	775	258	524	150	0.261935	1	1	-1.93272
0	13682	HSPC148	hHC016480	180	50	687	448	264	137	0.262009	1	1	-1.93231
0	2771	BLM	hHA035257	64	50	244	123	124	-1	0.262295	1	0	-1.93074
0	30830	PSMB8	hHA037412	163	51	621	491	161	110	0.26248	0	1	-1.92972
0	4613	POPDC3	hHC011018	250	53	952	657	329	194	0.262605	0	1	-1.92903
0	25535	C10orf97	hHC002287	155	44	590	268	337	112	0.262712	1	1	-1.92845
0	22420	ARID3B	hHC026562	174	51	662	462	205	118	0.26284	0	1	-1.92774
0	18154	PREB	hHC010721	152	50	578	398	196	100	0.262976	0	1	-1.927
0	601	CCDC33	hHR018889	76	46	289	225	79	0	0.262976	0	1	-1.927
0	18467	RNF13	hHC030389	184	53	699	492	222	128	0.263233	0	1	-1.92559
0	30589	GTPBP2	hHC014360	197	56	747	558	195	145	0.263722	0	1	-1.92291
0	25830	PMS1	hHC008731	310	56	1174	1531	566	255	0.264055	0	1	-1.92109
0	32015	ICK	hHC005888	169	60	640	337	328	104	0.264062	1	1	-1.92105
0	43454	IGHV1-69	hHO045095	98	56	371	146	236	7	0.264151	1	1	-1.92057
0	29720	CLDN11	hHC001532	130	50	492	308	190	76	0.264228	1	1	-1.92015
0	23741	PKNOX1	hHR004638	194	54	734	311	428	137	0.264305	1	1	-1.91972
0	32739	IRF5	hHC020168	129	50	488	147	347	43	0.264344	1	1	-1.91951
0	41221	LOC441015	hHR018346	175	46	662	150	516	77	0.26435	1	1	-1.91948
0	36825	C16orf51	hHC019689	68	50	257	165	99	7	0.264591	1	0	-1.91816
0	22914	DOC1	hHA034146	252	50	952	463	504	197	0.264706	1	1	-1.91754
0	34245	ZCSL2	hHC004881	318	51	1199	577	641	265	0.265221	1	1	-1.91473
0	30068	CASP4	hHA035132	95	46	358	241	123	47	0.265363	0	1	-1.91396
0	30003	SMG6	hHC018992	95	46	358	227	138	48	0.265363	1	1	-1.91396
0	21520	SNX27	hHR006138	138	53	520	478	194	83	0.265385	0	1	-1.91384
0	31284	C9orf114	hHR020420	141	53	531	303	231	83	0.265537	1	1	-1.91302
0	27516	BIRC6	hHC009547	239	56	900	348	557	181	0.265556	1	1	-1.91291
0	21427	PHB	hHC030894	106	47	398	320	100	60	0.266332	0	1	-1.9087
0	17431	SSR1	hHC008813	128	49	480	278	215	81	0.266667	1	1	-1.90689
0	23061	LOC134147	hHC005142	228	54	855	577	305	169	0.266667	0	1	-1.90689
0	23860	RP11-301I17.1	hHC006858	108	53	405	228	188	50	0.266667	1	1	-1.90689
0	17980	ADCY7	hHC003521	245	53	918	488	443	187	0.266885	1	1	-1.90571
0	971	STAU1	hHC019369	122	46	457	227	237	74	0.266958	1	1	-1.90531
0	13908	GALNT7	hHC003136	310	56	1161	348	819	245	0.267011	1	1	-1.90503
0	25980	C3orf34	hHC017467	136	50	509	395	132	83	0.267191	0	1	-1.90406
0	9845	F12	hHC016659	97	60	363	286	86	43	0.267218	0	1	-1.90391
0	10117	NNT	hHA035091	397	51	1484	370	1128	342	0.26752	1	1	-1.90228
0	14409	ZNF83	hHC006868	291	50	1087	473	680	241	0.267709	1	1	-1.90126
0	9786	ODF2L	hHR002271	90	54	336	243	109	30	0.267857	0	1	-1.90046
0	22577	ZNF207	hHE041430	161	50	601	361	273	110	0.267887	1	1	-1.9003
0	4326	SH2BP1	hHC002582	127	46	474	253	223	84	0.267932	1	1	-1.90006
0	9882	LOC389834	hHR031071	63	47	235	138	102	4	0.268085	1	0	-1.89924
0	31424	CSF2RA	hHR019460	153	54	570	313	259	96	0.268421	1	1	-1.89743
0	13227	GMDS	hHC008620	234	51	871	528	349	186	0.268657	1	1	-1.89616
0	33813	NFYB	hHC009489	161	46	599	415	192	115	0.268781	0	1	-1.8955
0	23371	ZC3HC1	hHC018366	186	51	691	523	175	136	0.269175	0	1	-1.89338
0	25808	CKAP5	hHC019195	80	46	297	268	90	33	0.26936	0	1	-1.89239
0	22693	USP6NL	hHC004758	163	51	605	312	303	109	0.269421	1	1	-1.89206
0	23253	MTMR12	hHR026142	246	57	913	432	485	186	0.269441	1	1	-1.89196
0	9571	LEPR	hHR002355	90	51	334	221	116	38	0.269461	1	1	-1.89185
0	22809	YLPM1	hHR006870	259	50	961	472	499	206	0.269511	1	1	-1.89158
0	30694	PUM2	hHC005540	116	46	430	305	134	67	0.269767	0	1	-1.89021
0	19032	C6orf167	hHC003593	133	59	493	233	275	74	0.269777	1	1	-1.89016
0	34159	APRT	hHR022641	190	54	704	490	246	132	0.269886	0	1	-1.88958
0	33992	LOC441561	hHR028797	149	47	552	433	131	99	0.269928	0	1	-1.88936
0	18933	HSPA9B	hHC028061	152	56	563	413	157	80	0.269982	0	1	-1.88906
0	17129	PCMTD1	hHC001997	124	50	459	293	179	73	0.270153	1	1	-1.88815
0	34247	RFK	hHR004977	315	56	1166	607	581	248	0.270154	1	1	-1.88814
0	14143	ND2	hHR015604	197	51	729	583	196	143	0.270233	0	1	-1.88772
0	28175	LOC286025	hHR025087	93	59	344	235	117	18	0.270349	0	1	-1.88711
0	31201	TM7SF2	hHC021080	136	50	503	311	210	81	0.270378	1	1	-1.88695
0	34358	MLH1	hHC006813	215	51	795	467	347	159	0.27044	1	1	-1.88662
0	22752	PDE4DIP	hHC032130	112	54	414	355	83	52	0.270531	0	1	-1.88613
0	18850	TCEB3	hHR007649	219	50	809	492	328	167	0.270705	1	1	-1.88521
0	38051	RFC4	hHA038194	106	49	391	292	184	64	0.2711	0	1	-1.8831
0	22270	MED25	hHC014754	257	51	947	473	474	205	0.271383	1	1	-1.8816
0	22185	HS3ST1	hHC003798	136	50	501	320	188	83	0.271457	1	1	-1.8812
0	31212	PCGF5	hHR001604	339	53	1247	448	817	284	0.271852	1	1	-1.8791
0	27259	FZD6	hHC005047	286	54	1052	463	620	236	0.271863	1	1	-1.87905
0	12815	XRCC5	hHC009580	116	47	426	267	173	67	0.2723	1	1	-1.87673
0	30864	EEFSEC	hHC011012	293	63	1076	645	456	228	0.272305	1	1	-1.87671
0	19635	SHFM1	hHC023741	163	59	598	406	201	64	0.272575	0	1	-1.87527
0	26792	BHLHB2	hHC025603	113	53	414	317	114	58	0.272947	0	1	-1.87331
0	30019	LOC401606	hHR030512	251	50	919	466	481	200	0.273123	1	1	-1.87238
0	27335	MAD2L1	hHC028159	177	53	648	198	473	120	0.273148	1	1	-1.87224
0	14657	TNPO1	hHC030292	244	50	893	471	448	194	0.273236	1	1	-1.87178
0	13758	SKP2	hHA038944	88	53	322	246	87	1	0.273292	0	1	-1.87149
0	997	MKLN1	hHR007561	115	46	420	248	180	67	0.27381	1	1	-1.86876
0	48129	PTGIR	hHC025308	89	46	325	137	193	10	0.273846	1	1	-1.86856
0	29879	IRF2	hHR004592	152	54	555	381	183	95	0.273874	0	1	-1.86842
0	50355	NFE2L3	hHR030156	150	50	547	207	347	100	0.274223	1	1	-1.86658
0	27875	RPN2	hCT000703	208	64	758	486	285	143	0.274406	1	1	-1.86561
0	22844	AKAP8	hHC009666	125	80	455	306	160	37	0.274725	0	1	-1.86394
0	32020	SUDS3	hHC006092	116	56	422	257	174	57	0.274882	1	1	-1.86312
0	22137	PCTK1	hHC022230	193	51	702	458	269	145	0.274929	1	1	-1.86287
0	9004	UNC50	hHC018999	157	50	571	370	198	103	0.274956	1	1	-1.86273
0	35132	FES	hHA039621	152	56	552	468	114	87	0.275362	0	1	-1.8606
0	47875	FSTL1	hHC008508	1086	59	3943	167	3790	1051	0.275425	1	1	-1.86027
0	19116	CAMK1D	hHC009545	203	63	737	531	219	137	0.275441	0	1	-1.86018
0	18666	DLST	hHR029153	231	53	838	522	322	174	0.275656	1	1	-1.85906
0	33646	PPM1A	hHC026013	184	47	667	457	272	133	0.275862	0	1	-1.85798
0	21754	LYST	hHR006618	117	46	424	272	156	65	0.275943	1	1	-1.85756
0	23917	MFNG	hHA039198	159	54	576	248	334	105	0.276042	1	1	-1.85704
0	13048	MRPL10	hHC014200	180	50	652	482	184	129	0.276074	0	1	-1.85688
0	31054	EXTL2	hHC018980	161	51	583	353	251	102	0.276158	1	1	-1.85644
0	31897	LOC389330	hHR016736	81	51	293	275	30	5	0.276451	0	1	-1.85491
0	19833	NOSIP	hHC021725	161	59	582	385	202	102	0.276632	1	1	-1.85396
0	22416	SMC4L1	hHR004098	463	53	1673	408	1285	417	0.276748	1	1	-1.85335
0	8787	GOLGA8B	hHR028587	195	51	704	295	413	142	0.276989	1	1	-1.8521
0	31001	LOC441756	hHR029912	175	110	631	496	114	61	0.277338	0	1	-1.85029
0	64	C9orf25	hHC023029	83	46	299	235	78	34	0.277592	0	1	-1.84896
0	13236	PAN3	hHC007096	98	46	353	225	135	48	0.27762	1	1	-1.84881
0	13783	PECR	hHC003700	143	50	515	377	154	90	0.27767	0	1	-1.84856
0	9147	CTSF	hHC020907	142	53	511	365	158	86	0.277886	0	1	-1.84743
0	34074	INOC1	hHC004317	274	56	986	477	531	224	0.27789	1	1	-1.84741
0	27016	KLHL15	hHR001795	272	51	978	450	530	225	0.278119	1	1	-1.84623
0	34897	SSR3	hHC005721	178	60	640	483	167	119	0.278125	0	1	-1.84619
0	14663	PRO1073	hHR005236	168	50	604	437	184	117	0.278146	0	1	-1.84609
0	9401	LOC375251	hHC030027	95	51	341	303	50	42	0.278592	0	1	-1.84377
0	27580	MCM6	hHA037963	211	57	757	345	415	153	0.278732	1	1	-1.84305
0	34433	LRRC20	hHC020433	308	51	1105	411	698	253	0.278733	1	1	-1.84304
0	23916	CYP3A7	hHC029130	118	56	423	275	166	60	0.27896	1	1	-1.84187
0	34059	COQ2	hHC008241	194	50	695	386	338	133	0.279137	1	1	-1.84096
0	30734	ATIC	hHA034724	223	51	798	520	298	168	0.279449	1	1	-1.83935
0	24034	VPS18	hHC021738	118	56	422	258	174	60	0.279621	1	1	-1.83846
0	28082	HIST4H4	hHR017515	186	63	665	378	292	121	0.279699	1	1	-1.83805
0	16832	PTBP1	hHC016505	175	46	625	308	325	127	0.28	1	1	-1.8365
0	32891	C6orf47	hHC011336	98	50	350	152	203	26	0.28	1	1	-1.8365
0	29436	LOC442248	hHR028220	108	46	385	280	109	60	0.280519	0	1	-1.83383
0	9233	POLB	hHC020427	133	54	474	373	104	77	0.280591	0	1	-1.83346
0	45335	PPP4C	hHC019979	160	50	570	171	414	86	0.280702	1	1	-1.83289
0	25861	DUSP22	hHC010255	96	43	342	246	115	51	0.280702	0	1	-1.83289
0	33157	HSZFP36	hHC019112	100	54	356	167	204	33	0.280899	1	1	-1.83188
0	4562	TMEM46	hHR003926	75	46	267	200	74	27	0.280899	0	1	-1.83188
0	12660	JTV1	hHC022840	140	50	498	446	68	93	0.281124	0	1	-1.83072
0	14649	NOC3L	hHC007636	276	50	981	413	588	226	0.281346	1	1	-1.82958
0	26465	FAM111A	hHC009559	426	51	1513	313	1213	386	0.28156	1	1	-1.82849
0	22749	C1orf37	hHC032022	216	56	767	490	292	154	0.281617	1	1	-1.8282
0	8667	SPOCD1	hHC018219	111	53	394	278	116	56	0.281726	0	1	-1.82764
0	13410	KIAA0649	hHC028888	164	49	582	371	219	111	0.281787	1	1	-1.82732
0	30546	CYP2A7	hHC031844	148	50	525	343	193	91	0.281905	1	1	-1.82672
0	9752	CCL20	hHC010623	141	57	500	390	122	83	0.282	0	1	-1.82623
0	25889	FLJ14668	hHR027727	310	54	1099	582	517	255	0.282075	1	1	-1.82585
0	13433	TRIM44	hHC020428	142	47	503	322	185	89	0.282306	1	1	-1.82467
0	31804	MTMR6	hHC010700	436	63	1544	533	1026	367	0.282383	1	1	-1.82427
0	26260	F2RL1	hHR018499	126	49	446	328	151	77	0.282511	0	1	-1.82362
0	23650	TOMM22	hHC029802	158	60	559	363	197	89	0.282648	1	1	-1.82292
0	22692	ZNF529	hHC004674	118	50	417	308	116	61	0.282974	0	1	-1.82126
0	27128	SLC37A4	hHC025219	155	47	547	363	189	106	0.283364	1	1	-1.81927
0	23587	TRIOBP	hHA039870	208	60	734	425	314	147	0.283379	1	1	-1.8192
0	29786	MIPEP	hHC028508	216	50	762	490	279	169	0.283465	1	1	-1.81876
0	694	VEZT	hHC027925	93	47	328	227	120	46	0.283537	0	1	-1.81839
0	31449	ATPAF1	hHC007640	192	50	677	405	284	140	0.283604	1	1	-1.81805
0	18190	MRPL35	hHC011297	233	50	821	482	338	213	0.2838	1	1	-1.81705
0	29644	EIF2AK4	hHR005564	107	43	377	262	125	60	0.28382	0	1	-1.81695
0	30114	CYP2U1	hHC008924	155	50	546	368	185	100	0.283883	0	1	-1.81663
0	26803	C20orf14	hHC022327	201	51	708	358	356	149	0.283898	1	1	-1.81655
0	29457	EVI5L	hHC022736	138	50	486	353	148	90	0.283951	0	1	-1.81629
0	22308	PLS1	hHC003138	190	51	669	303	383	136	0.284006	1	1	-1.81601
0	21540	KRTAP10-8	hHC025530	112	56	394	347	99	51	0.284264	0	1	-1.8147
0	31627	LOC221362	hHR002624	93	51	327	220	111	36	0.284404	0	1	-1.81399
0	48423	SEMA3C	hHC002436	162	50	569	152	426	110	0.28471	1	1	-1.81243
0	31563	SHARPIN	hHC022976	134	56	470	278	193	80	0.285106	1	1	-1.81043
0	19264	FLJ20628	hHC003977	349	63	1224	628	616	287	0.285131	1	1	-1.8103
0	14080	SYBL1	hHC030976	220	51	771	441	349	168	0.285344	1	1	-1.80923
0	13194	CANT1	hHC017752	347	50	1216	523	698	313	0.285362	1	1	-1.80914
0	17905	TFRC	hHC006485	357	54	1251	455	818	297	0.285372	1	1	-1.80909
0	30042	TFF2	hHC004700	143	46	501	393	121	97	0.285429	0	1	-1.8088
0	2645	TRNS2	hHR029593	707	57	2475	138	2342	686	0.285657	1	1	-1.80765
0	37685	DOCK11	hHR021801	126	51	441	216	238	82	0.285714	1	1	-1.80735
0	25355	HNRPH2	hHC026287	118	44	413	278	152	72	0.285714	0	1	-1.80735
0	31326	MICAL1	hHC025124	236	47	826	500	384	200	0.285714	1	1	-1.80735
0	14026	LOC389053	hHR026848	167	51	584	397	204	112	0.285959	0	1	-1.80612
0	23613	MPHOSPH1	hHR005790	237	56	827	418	466	173	0.286578	1	1	-1.803
0	25411	SMAD3	hHC009391	94	44	328	235	100	49	0.286585	0	1	-1.80296
0	18604	SMC4L1	hHC006593	229	50	799	363	431	173	0.286608	1	1	-1.80285
0	48116	GUSB	hHA033096	86	60	300	168	142	0	0.286667	1	0	-1.80255
0	31434	EPB41	hHC011876	327	57	1140	336	812	276	0.286842	1	1	-1.80167
0	30354	PURA	hHR013148	107	50	373	312	72	51	0.286863	0	1	-1.80156
0	45963	TRNW	hHR029003	136	56	474	197	301	80	0.28692	1	1	-1.80128
0	19025	CTDSPL2	hHC002525	275	60	958	542	427	216	0.287056	1	1	-1.80059
0	23763	SLTM	hHC010302	243	59	846	445	415	180	0.287234	1	1	-1.7997
0	34471	ARPC1A	hHA033393	182	63	633	535	110	117	0.28752	0	1	-1.79827
0	33716	TMEM48	hHC015933	231	51	803	400	441	180	0.287671	1	1	-1.79751
0	16862	PCOLN3	hHC022937	99	47	344	370	58	47	0.287791	0	1	-1.79691
0	22636	NARG2	hHR015042	167	50	580	265	328	114	0.287931	1	1	-1.7962
0	34599	PTP4A1	hHR007665	239	53	830	437	425	178	0.287952	1	1	-1.7961
0	42935	LOC440979	hHR021875	293	56	1017	592	475	237	0.288102	1	1	-1.79535
0	34893	MTF2	hHC005529	185	51	642	430	229	142	0.288162	0	1	-1.79505
0	31838	FJX1	hHC011180	149	56	517	288	230	87	0.288201	1	1	-1.79485
0	28057	GRB10	hHC006751	115	56	399	246	164	51	0.288221	1	1	-1.79475
0	26470	C20orf55	hHC014755	176	49	610	371	280	127	0.288525	1	1	-1.79323
0	49737	LOC347424	hHR028524	88	56	305	253	59	20	0.288525	0	1	-1.79323
0	35014	RAP2A	hHC004005	256	60	886	526	369	196	0.288939	1	1	-1.79116
0	25847	FLJ10726	hHC004975	113	46	391	291	124	65	0.289003	0	1	-1.79085
0	29907	ZRF1	hHC013616	144	51	498	380	135	88	0.289157	0	1	-1.79008
0	9693	REEP3	hHR005523	99	53	342	233	122	43	0.289474	0	1	-1.7885
0	13305	MYLK	hHC012364	139	47	480	618	257	89	0.289583	0	1	-1.78795
0	13994	LOC151162	hHR011488	433	51	1494	393	1116	379	0.289826	1	1	-1.78674
0	29917	FLJ10006	hHC006032	251	44	866	248	624	212	0.289838	1	1	-1.78668
0	31022	HMBS	hCP000548	121	53	417	283	142	60	0.290168	0	1	-1.78504
0	4534	OSBPL9	hHR002198	84	46	289	182	113	35	0.290657	1	1	-1.78261
0	29431	PRR11	hHC016496	100	44	344	228	121	2	0.290698	1	1	-1.78241
0	25542	BCL10	hHC011419	98	46	337	268	74	48	0.290801	0	1	-1.78189
0	48661	MAMDC2	hHC003876	171	60	588	163	438	109	0.290816	1	1	-1.78182
0	26712	NFYB	hHR008323	140	51	481	338	159	3	0.29106	0	1	-1.78061
0	9323	TICAM1	hHA038571	141	53	484	342	144	87	0.291322	0	1	-1.77931
0	49994	CUL4B	hHR004728	93	56	319	240	104	40	0.291536	0	1	-1.77825
0	9060	IMPA1	hHC010167	262	53	898	392	520	206	0.291759	1	1	-1.77715
0	13699	KIF20A	hHR006196	548	50	1878	223	1663	497	0.2918	1	1	-1.77695
0	30913	PARP12	hHC008408	225	50	771	421	374	169	0.291829	1	1	-1.77681
0	29983	PSMC6	hHC029552	165	46	565	408	163	113	0.292035	0	1	-1.77578
0	798	HSMPP8	hHC009877	85	44	291	231	65	39	0.292096	0	1	-1.77548
0	50364	ZZZ3	hHC005208	140	47	479	218	269	93	0.292276	1	1	-1.7746
0	19027	HIPK1	hHC002621	197	60	674	420	256	141	0.292285	1	1	-1.77455
0	30661	TMCC1	hHC009368	181	47	619	346	287	126	0.292407	1	1	-1.77395
0	31152	MXRA8	hHR032132	246	50	841	463	401	197	0.292509	1	1	-1.77345
0	22593	VEGF	hHC025686	141	51	482	210	281	85	0.292531	1	1	-1.77334
0	32019	RHOU	hHC006080	207	57	707	266	449	144	0.292786	1	1	-1.77208
0	15464	ITCH	hHC001672	70	50	239	125	119	16	0.292887	1	0	-1.77158
0	23558	ACTR8	hHC008106	226	63	770	422	350	157	0.293506	1	1	-1.76854
0	30278	MXD3	hHC025244	138	43	470	242	242	93	0.293617	1	1	-1.76799
0	26386	ZNF268	hHC003811	106	50	361	227	148	51	0.293629	1	1	-1.76793
0	25598	SNFT	hHC016795	148	49	504	228	281	14	0.293651	1	1	-1.76783
0	50013	CCDC14	hHC010284	131	50	446	183	264	80	0.293722	1	1	-1.76748
0	30330	WARS	hHC021596	132	50	449	288	168	73	0.293987	1	1	-1.76618
0	31653	RAG1AP1	hHC026144	172	77	585	363	219	93	0.294017	1	1	-1.76603
0	34710	REXO1	hHC022821	73	47	248	198	65	2	0.294355	0	1	-1.76437
0	9092	PCGF6	hHR027831	96	46	326	261	73	47	0.294479	0	1	-1.76377
0	26868	LOC441237	hHR030403	205	51	696	525	238	146	0.29454	0	1	-1.76346
0	13380	KIAA0515	hHR017464	229	49	777	303	489	180	0.294723	1	1	-1.76257
0	18495	C9orf5	hHC004853	253	54	858	382	497	200	0.294872	1	1	-1.76184
0	8488	TSSC1	hHC022263	92	50	312	243	75	39	0.294872	0	1	-1.76184
0	26498	CORO2A	hHC005731	222	49	752	313	446	171	0.295213	1	1	-1.76017
0	26818	ZAP70	hHA040675	187	50	633	423	227	133	0.295419	0	1	-1.75917
0	25966	FRYL	hHC001819	125	46	423	268	172	77	0.295508	1	1	-1.75873
0	27674	LOC440424	hHR026731	173	56	585	337	252	113	0.295726	1	1	-1.75766
0	23029	CNOT2	hHC011670	197	56	666	403	283	137	0.295796	1	1	-1.75733
0	23731	TMEM19	hHC008766	148	57	500	418	87	92	0.296	0	1	-1.75633
0	30968	C10orf18	hHC006020	229	50	773	540	300	177	0.296248	0	1	-1.75512
0	32251	BAX	hHC021056	177	60	597	417	184	116	0.296482	0	1	-1.75398
0	31052	JOSD3	hHR018884	121	53	408	275	140	54	0.296569	0	1	-1.75356
0	34597	NAB1	hHC007569	278	50	937	437	522	220	0.296692	1	1	-1.75296
0	43598	TRNF	hHR029735	2305	66	7766	158	7624	2265	0.296807	1	1	-1.7524
0	7569	POU1F1	hHC014690	103	46	347	132	225	43	0.29683	1	1	-1.75229
0	19541	PHKB	hHC004637	410	63	1380	540	847	341	0.297101	1	1	-1.75097
0	23589	MGC4399	hHR015390	192	60	646	423	224	130	0.297214	1	1	-1.75043
0	31163	KIF3B	hHC008888	225	54	757	402	376	166	0.297226	1	1	-1.75037
0	14269	MAT2A	hHC030484	217	53	729	433	317	163	0.297668	1	1	-1.74822
0	31452	ATG4B	hHR030020	237	56	796	368	433	178	0.297739	1	1	-1.74788
0	29915	RNASEN	hHC005936	95	43	319	221	108	50	0.297806	0	1	-1.74756
0	9758	PCDHGB7	hHR012063	98	49	329	218	122	47	0.297872	1	1	-1.74723
0	34304	LOC348162	hHR032253	345	54	1156	608	590	292	0.298443	1	1	-1.74447
0	18097	SNRPD1	hHC005717	123	46	412	303	119	74	0.298544	0	1	-1.74399
0	29768	BRPF3	hHC004220	150	43	502	263	249	108	0.298805	1	1	-1.74272
0	45539	DDX23	hHR028619	75	46	251	206	53	27	0.298805	0	1	-1.74272
0	9001	TRIM11	hHC018891	180	51	602	355	247	125	0.299003	1	1	-1.74177
0	26416	FBXO2	hHC024067	93	49	311	266	79	40	0.299035	0	1	-1.74161
0	26566	APP	hCT001315	138	50	461	218	251	86	0.299349	1	1	-1.7401
0	40800	SIAHBP1	hHA032398	168	51	561	152	415	76	0.299465	1	1	-1.73954
0	23434	DHTKD1	hHC002154	230	54	768	457	345	172	0.299479	1	1	-1.73947
0	30415	BRCA2	hHC005360	76	47	253	218	60	23	0.300395	0	1	-1.73507
0	4262	MYH9	hHR022934	153	46	509	382	261	105	0.300589	0	1	-1.73413
0	8878	TMEM65	hHC004503	123	51	409	345	117	69	0.300733	0	1	-1.73344
0	14346	LOC390842	hHR028000	188	53	625	616	177	136	0.3008	0	1	-1.73312
0	33726	SMC2L1	hHC002589	108	51	359	281	88	52	0.300836	0	1	-1.73295
0	17198	SAPS3	hHC016793	99	47	329	233	111	49	0.300912	0	1	-1.73259
0	18113	TMCO3	hHC003413	388	54	1289	370	926	326	0.301009	1	1	-1.73212
0	38104	CHCHD1	hHC010750	208	84	691	462	245	119	0.301013	0	1	-1.7321
0	13171	HPRT1	hCP000556	199	46	661	303	375	153	0.301059	1	1	-1.73188
0	29440	PDAP1	hHC028412	134	46	445	340	118	87	0.301124	0	1	-1.73157
0	31094	PRDM4	hHR004772	259	51	860	511	420	205	0.301163	1	1	-1.73138
0	21150	SCAND1	hHC027546	110	56	365	327	113	64	0.30137	0	1	-1.73039
0	27000	PIK3R4	hHC020995	195	53	647	237	426	138	0.301391	1	1	-1.73029
0	23285	RARG	hHC019998	180	76	597	398	210	93	0.301508	0	1	-1.72973
0	30587	GMEB2	hHC014264	286	50	948	532	415	233	0.301688	1	1	-1.72887
0	30946	GTF3C3	hHC015716	228	50	755	433	327	176	0.301987	1	1	-1.72744
0	25389	PYCRL	hHR020239	114	46	377	265	119	67	0.302387	0	1	-1.72553
0	40056	MUC6	hHC026254	72	50	238	158	85	10	0.302521	1	0	-1.72489
0	27191	RNU86	hHR023287	173	51	571	368	233	116	0.302977	1	1	-1.72272
0	26177	HDAC2	hHC011599	160	46	528	226	327	108	0.30303	1	1	-1.72247
0	33613	SLITL2	hHC018705	328	46	1082	366	749	290	0.303142	1	1	-1.72193
0	35431	ZFP90	hHC017529	195	56	643	306	331	137	0.303266	1	1	-1.72134
0	10029	CFC1	hHR029331	143	54	470	273	222	89	0.304255	1	1	-1.71665
0	12661	MARCKS	hHR022924	92	50	302	280	32	16	0.304636	0	1	-1.71484
0	50104	PPAP2B	hHC006552	131	50	430	181	255	80	0.304651	1	1	-1.71477
0	27258	SEPHS1	hHC030307	241	51	791	475	343	189	0.304678	1	1	-1.71464
0	18389	ZCCHC9	hHC025493	234	64	768	530	265	162	0.304688	0	1	-1.7146
0	45202	KLHL23	hHR006263	87	47	285	192	97	37	0.305263	0	1	-1.71187
0	37922	ZBTB10	hHC002398	87	54	285	317	-10	29	0.305263	0	1	-1.71187
0	25473	PRMT5	hHA037711	90	46	294	238	61	43	0.306122	0	1	-1.70782
0	49470	DNHD3	hHC016056	79	47	258	225	42	13	0.306202	0	1	-1.70745
0	13779	TSPAN5	hHR003508	207	50	676	498	230	159	0.306213	0	1	-1.70739
0	13296	MTHFD2	hHC028024	95	46	310	220	98	45	0.306452	0	1	-1.70627
0	4212	KIAA2010	hHC018614	81	43	264	180	88	37	0.306818	0	1	-1.70454
0	31388	RDX	hHR023108	235	50	765	423	352	183	0.30719	1	1	-1.7028
0	49408	KIAA1542	hHC022680	115	50	374	260	128	63	0.307487	0	1	-1.7014
0	12904	C8orf40	hHC010744	113	46	367	267	117	64	0.307902	0	1	-1.69946
0	15334	CCDC77	hHC006952	85	56	276	246	33	24	0.307971	0	1	-1.69913
0	30492	CTSD	hHC025796	175	50	568	355	233	123	0.308099	1	1	-1.69854
0	34355	EXOC7	hHR006705	351	47	1139	437	721	309	0.308165	1	1	-1.69822
0	12989	DKFZP564M1416	hHR028684	246	50	798	451	365	200	0.308271	1	1	-1.69773
0	13987	TBC1D22A	hHC011188	202	50	655	452	217	153	0.308397	0	1	-1.69714
0	49704	TPX2	hHC021144	99	57	321	232	95	23	0.308411	0	1	-1.69707
0	8904	SMC5L1	hHC003063	128	51	414	293	126	69	0.309179	0	1	-1.69349
0	12997	P2RX7	hHC016780	103	43	333	233	106	3	0.309309	0	1	-1.69288
0	22122	HSPA4	hHA035682	262	50	847	413	432	207	0.309327	1	1	-1.6928
0	8118	PLSCR4	hHC001838	91	46	294	133	162	43	0.309524	1	1	-1.69188
0	37862	ATP6V1E1	hHR022942	139	47	449	296	186	96	0.309577	1	1	-1.69163
0	23593	STS	hHC015582	362	57	1169	423	752	304	0.309666	1	1	-1.69121
0	46166	PKD2	hHC005303	88	50	284	207	83	7	0.309859	0	1	-1.69032
0	25697	CYBRD1	hHR002767	305	46	984	277	727	255	0.309959	1	1	-1.68985
0	691	SNX7	hHC027817	115	46	371	233	148	67	0.309973	1	1	-1.68979
0	22256	C22orf25	hHO047874	213	56	687	488	219	154	0.310044	0	1	-1.68946
0	46391	NIFUN	hHC020340	148	73	477	363	132	76	0.310273	0	1	-1.68839
0	30680	GUSBL2	hHC031364	144	56	464	317	164	85	0.310345	0	1	-1.68806
0	755	NUP205	hHC006697	95	46	306	218	106	47	0.310458	0	1	-1.68753
0	45118	TRBV21-1	hHO048815	167	53	537	158	387	78	0.310987	1	1	-1.68507
0	26676	RPE	hHC030787	163	51	524	343	204	108	0.311069	1	1	-1.68469
0	14331	CRTC1	hHR026932	182	56	585	388	197	124	0.311111	1	1	-1.6845
0	43006	CCL3	hHC030239	262	59	842	587	336	204	0.311164	0	1	-1.68425
0	21057	OSBPL8	hHR022734	192	50	617	372	279	141	0.311183	1	1	-1.68416
0	25783	LOC286157	hHR029551	141	46	453	280	180	94	0.311258	1	1	-1.68382
0	27088	LOC392347	hHR020611	118	63	379	283	101	11	0.311346	0	1	-1.68341
0	50083	ANP32E	hHC023628	346	56	1111	223	903	293	0.311431	1	1	-1.68301
0	34679	GPR110	hHC016377	260	56	834	347	487	204	0.311751	1	1	-1.68154
0	23689	IFT172	hHC015198	217	60	696	398	308	166	0.311782	1	1	-1.68139
0	3615	SYNJ1	hHA040705	82	44	263	141	123	26	0.311787	1	1	-1.68137
0	550	SMURF1	hHC029845	83	46	266	158	131	37	0.31203	1	1	-1.68024
0	13409	LOC390345	hHR028876	137	50	439	378	76	83	0.312073	0	1	-1.68005
0	21715	NEDD4L	hHR009006	103	46	330	201	137	57	0.312121	1	1	-1.67982
0	13215	GOLT1B	hHA034540	74	49	237	228	44	24	0.312236	0	1	-1.67929
0	14024	UHRF2	hHR026752	272	50	871	408	485	223	0.312285	1	1	-1.67907
0	29547	ADIPOR1	hHC027440	154	47	493	385	132	104	0.312373	0	1	-1.67866
0	30992	D21S2056E	hHC025604	145	54	464	262	207	86	0.3125	1	1	-1.67807
0	25860	Kua	hHC010171	205	50	656	731	235	150	0.3125	0	1	-1.67807
0	13806	IMMT	hHC026272	336	50	1075	471	643	291	0.312558	1	1	-1.6778
0	21633	RAD50	hHC006990	131	60	419	306	123	66	0.312649	0	1	-1.67738
0	32374	CENTG1	hHC025004	113	56	361	257	118	57	0.313019	0	1	-1.67568
0	23859	KIAA1414	hHC006846	191	53	610	251	374	134	0.313115	1	1	-1.67524
0	22012	AIM1	hHC005178	73	47	233	201	40	23	0.313305	0	1	-1.67436
0	18442	BIN3	hHC015329	223	56	711	463	261	164	0.313643	1	1	-1.67281
0	18794	C16orf48	hHC023393	129	50	411	320	108	76	0.313869	0	1	-1.67177
0	30845	FBXL13	hHC016664	169	50	538	306	235	120	0.314126	1	1	-1.67058
0	26462	KIAA0674	hHR009379	296	50	942	426	519	250	0.314225	1	1	-1.67013
0	13197	TBL1X	hHC017932	216	51	687	450	250	175	0.31441	1	1	-1.66928
0	14457	C1GALT1	hHR024916	364	60	1156	498	659	303	0.314879	1	1	-1.66713
0	46207	HPRT1	hCP000372	282	63	895	948	322	211	0.315084	0	1	-1.66619
0	27203	JMJD1B	hHC013111	311	51	987	395	569	255	0.315096	1	1	-1.66614
0	8813	XPO4	hHC011019	133	51	422	297	134	80	0.315166	0	1	-1.66582
0	14064	BARD1	hHC011008	128	51	406	191	223	79	0.315271	1	1	-1.66534
0	34315	RABGAP1	hHR009009	288	63	913	656	296	213	0.315444	0	1	-1.66455
0	34238	BFAR	hHC007197	324	50	1027	633	411	276	0.315482	1	1	-1.66437
0	18427	TIMM9	hHC029237	224	56	710	498	239	164	0.315493	0	1	-1.66432
0	19601	ERP29	hHC032093	242	64	767	520	252	177	0.315515	0	1	-1.66422
0	30341	PRKD2	hHC023312	189	50	599	288	312	133	0.315526	1	1	-1.66417
0	22418	HISPPD1	hHC004194	203	49	643	312	365	154	0.315708	1	1	-1.66334
0	14492	ZMPSTE24	hHC007744	180	53	570	340	244	123	0.315789	1	1	-1.66297
0	26793	C1orf108	hHC025687	144	50	456	343	134	93	0.315789	0	1	-1.66297
0	14073	SDHA	hCM001108	212	51	671	448	248	159	0.315946	0	1	-1.66225
0	13107	FLJ35348	hHC013612	237	50	750	451	302	186	0.316	1	1	-1.662
0	15670	KCTD11	hHC019240	87	56	275	217	68	27	0.316364	0	1	-1.66034
0	23888	NT5DC2	hHC024330	157	56	496	253	258	97	0.316532	1	1	-1.65958
0	25961	TOR1A	hHC001615	83	44	262	213	81	36	0.316794	0	1	-1.65838
0	9030	PET112L	hHC008727	148	53	467	338	129	88	0.316916	0	1	-1.65783
0	29432	STAMBPL1	hHC016508	168	46	530	278	258	123	0.316981	1	1	-1.65753
0	27541	TMEM118	hHC005407	105	51	331	252	88	52	0.317221	0	1	-1.65644
0	9095	TOMM22	hHR028011	92	50	290	253	39	39	0.317241	0	1	-1.65635
0	34171	HPRT1	hCP000561	345	54	1087	673	399	292	0.317387	1	1	-1.65568
0	9098	AQP12A	hHC031959	140	46	441	210	246	93	0.31746	1	1	-1.65535
0	14297	ARMCX1	hHC004948	304	53	957	543	484	253	0.317659	1	1	-1.65445
0	21847	DERL1	hHR008046	130	46	409	218	201	81	0.317848	1	1	-1.65359
0	15544	TMEM16F	hHC007816	370	63	1163	488	687	308	0.318143	1	1	-1.65225
0	22549	CHM	hHC002838	364	51	1144	520	671	319	0.318182	1	1	-1.65208
0	4968	STX7	hHC001910	141	50	443	272	175	90	0.318284	1	1	-1.65161
0	27935	EXOC8	hHC007039	229	60	719	330	424	167	0.318498	1	1	-1.65064
0	46541	KIAA1731	hHC011412	94	51	295	253	52	12	0.318644	0	1	-1.64998
0	34098	GFM1	hHC002781	251	51	787	327	475	196	0.318933	1	1	-1.64868
0	18603	SPTLC2	hHC006581	185	47	580	368	218	133	0.318966	1	1	-1.64853
0	9908	LARP4	hHR008127	150	53	470	208	270	97	0.319149	1	1	-1.6477
0	14350	VWA1	hHC032032	218	56	683	462	245	163	0.31918	0	1	-1.64756
0	50359	PTPRE	hHR005004	136	49	426	188	248	84	0.319249	1	1	-1.64725
0	41849	SIVA	hHA032362	71	46	222	200	29	21	0.31982	0	1	-1.64467
0	29931	MRPS15	hHA035888	199	49	622	475	156	150	0.319936	0	1	-1.64415
0	41718	USP1	hHR001846	405	51	1265	195	1088	362	0.320158	1	1	-1.64314
0	12984	IL24	hHA037624	316	50	987	488	539	276	0.320162	1	1	-1.64313
0	33963	SNAI2	hHC004017	237	46	740	466	300	190	0.32027	1	1	-1.64264
0	13266	GART	hHA035032	84	46	262	210	60	37	0.320611	0	1	-1.64111
0	16953	RP9	hHR026189	101	60	315	276	39	40	0.320635	0	1	-1.641
0	13955	LOC286059	hHR011956	308	50	960	475	517	263	0.320833	1	1	-1.6401
0	5064	CSE1L	hHA034166	77	46	240	153	98	30	0.320833	1	1	-1.6401
0	23684	RPS6KB1	hHC029514	284	60	885	416	462	220	0.320904	1	1	-1.63979
0	23235	MBTPS1	hHC003774	407	60	1268	388	877	350	0.320978	1	1	-1.63945
0	22311	KIAA1033	hHC003318	401	51	1249	453	801	350	0.321057	1	1	-1.6391
0	21765	MPHOSPH6	hHC001806	131	46	408	317	103	84	0.321078	0	1	-1.639
0	30883	MB	hHC012728	202	50	629	483	172	153	0.321145	0	1	-1.6387
0	25468	LHFPL2	hHR018235	333	50	1036	653	403	283	0.321429	1	1	-1.63743
0	16810	GLUL	hHC018521	72	46	224	155	81	23	0.321429	0	1	-1.63743
0	26355	PSMD13	hHA038839	126	50	392	232	169	73	0.321429	1	1	-1.63743
0	18456	HSP90AA3P	hHR019073	326	51	1014	467	566	273	0.321499	1	1	-1.63711
0	26216	ZNF184	hHC005371	286	51	889	505	421	222	0.32171	1	1	-1.63617
0	15603	C3orf31	hHA032572	179	56	556	423	141	123	0.321942	0	1	-1.63513
0	33115	DIP2A	hHA040520	123	46	382	167	216	18	0.32199	1	1	-1.63491
0	31772	PPM1B	hHC018380	181	74	562	356	225	107	0.322064	1	1	-1.63458
0	14219	HMBS	hCP000436	96	54	298	212	95	40	0.322148	0	1	-1.63421
0	31216	CUL4A	hHR001796	450	51	1396	396	1018	399	0.32235	1	1	-1.6333
0	9214	ZNF714	hHC029079	118	46	366	280	106	74	0.322404	0	1	-1.63306
0	30660	PSME3	hHC009284	222	50	688	238	472	176	0.322674	1	1	-1.63185
0	31186	FLJ38973	hHC023780	264	51	818	468	367	209	0.322738	1	1	-1.63156
0	22166	MYH10	hHC015906	317	54	982	455	537	267	0.322811	1	1	-1.63124
0	34777	LOC285636	hHC002649	261	54	807	433	384	207	0.32342	1	1	-1.62852
0	21332	CYP1B1	hHC002106	122	46	377	295	91	71	0.323607	0	1	-1.62768
0	25731	TRAPPC3	hHA035887	146	47	451	421	71	96	0.323725	0	1	-1.62716
0	48095	MATN2	hHC007932	145	47	447	142	312	97	0.324385	1	1	-1.62422
0	24655	COG6	hHC013446	246	51	758	171	593	190	0.324538	1	1	-1.62354
0	49135	JAGN1	hHC020484	138	59	425	208	249	8	0.324706	1	1	-1.62279
0	29129	PRRX2	hHC017383	70	46	215	201	20	5	0.325581	0	1	-1.61891
0	4358	CDK5	hHC026390	87	43	267	195	77	41	0.325843	0	1	-1.61775
0	32171	PPHLN1	hHA035264	146	59	448	278	182	87	0.325893	1	1	-1.61753
0	30669	EFCAB1	hHC014744	122	46	374	377	13	7	0.326203	0	1	-1.61616
0	23326	CTGLF1	hHR031146	336	60	1030	392	635	273	0.326214	1	1	-1.61611
0	4909	FAM79A	hHC012554	79	50	242	271	-6	16	0.326446	0	1	-1.61508
0	32879	VPS13B	hHC001928	79	46	242	208	41	30	0.326446	0	1	-1.61508
0	26697	DNAJB6	hHR014167	244	51	747	440	341	188	0.32664	1	1	-1.61423
0	19028	GALC	hHC002633	351	57	1074	332	766	293	0.326816	1	1	-1.61345
0	26859	MAPK1	hHA034231	240	51	734	373	386	192	0.326975	1	1	-1.61275
0	751	C21orf122	hHR021097	105	46	321	243	113	0	0.327103	0	1	-1.61218
0	22120	HSPA4	hHA035586	231	50	706	387	329	179	0.327195	1	1	-1.61178
0	22884	TBC1D7	hHC020418	234	50	715	467	274	187	0.327273	1	1	-1.61143
0	30945	RBM17	hHR015704	219	51	669	425	281	162	0.327354	1	1	-1.61108
0	30238	MRPL37	hHC020636	119	50	363	235	140	56	0.327824	1	1	-1.60901
0	26886	BAHD1	hHC007075	224	50	683	357	343	181	0.327965	1	1	-1.60839
0	30327	SLC35B1	hHA038768	82	51	250	206	62	15	0.328	0	1	-1.60823
0	26397	GOLGA2	hHR027415	193	63	588	398	200	126	0.328231	0	1	-1.60722
0	29828	C6orf68	hHC030908	161	46	490	262	237	113	0.328571	1	1	-1.60572
0	21509	MIPEP	hHR013710	94	47	286	207	91	44	0.328671	0	1	-1.60528
0	35311	CHRAC1	hHR010233	336	76	1022	665	342	267	0.328767	1	1	-1.60486
0	26945	HBA1	hHR027991	196	49	596	370	241	148	0.328859	1	1	-1.60446
0	34398	BSDC1	hHC009885	223	54	678	423	265	162	0.328909	1	1	-1.60424
0	22197	GMFB	hHR027414	596	53	1812	441	1382	577	0.328918	1	1	-1.6042
0	32819	LRRC56	hHC018248	80	50	243	265	8	20	0.329218	0	1	-1.60288
0	46127	KIAA0368	hHR011531	83	53	252	197	62	11	0.329365	0	1	-1.60224
0	45739	KIAA0676	hHC015179	86	56	261	220	49	30	0.329502	0	1	-1.60164
0	29945	PLAC8	hHC029648	90	44	273	238	55	45	0.32967	0	1	-1.6009
0	22664	LYPLAL1	hHA034434	152	56	461	297	174	94	0.329718	1	1	-1.6007
0	34295	C18orf21	hHC028017	285	50	864	603	273	233	0.329861	0	1	-1.60007
0	13023	SDHA	hCM001132	99	46	300	228	77	47	0.33	0	1	-1.59946
0	12629	LOC285958	hHR016396	200	50	606	417	208	153	0.330033	0	1	-1.59932
0	27571	SUFU	hHC018367	104	53	315	235	88	47	0.330159	0	1	-1.59877
0	22611	SDCBP2	hHA040374	253	53	766	481	345	194	0.330287	1	1	-1.59821
0	35016	RAMP2	hHC004101	305	56	923	433	506	253	0.330444	1	1	-1.59752
0	34703	ITK	hHC006393	78	46	236	177	63	11	0.330508	0	1	-1.59724
0	16958	NFAM1	hHC026393	125	49	378	250	136	74	0.330688	1	1	-1.59646
0	18241	CHMP5	hHC028757	190	50	574	386	196	77	0.33101	0	1	-1.59505
0	23855	LOC146346	hHR006654	279	60	841	403	444	217	0.331748	1	1	-1.59184
0	36807	ENPP1	hHC022665	157	44	473	200	281	110	0.331924	1	1	-1.59108
0	18386	ADD3	hHA036065	490	56	1476	388	1089	417	0.331978	1	1	-1.59084
0	32194	SRD5A2L	hHC027884	280	59	843	498	350	217	0.332147	1	1	-1.59011
0	33930	DYRK1A	hHR002013	393	53	1183	565	675	344	0.332206	1	1	-1.58985
0	3462	TRIM6	hHC012205	103	46	310	158	158	57	0.332258	1	1	-1.58962
0	30188	IGFBP6	hHC024380	126	46	379	263	133	77	0.332454	0	1	-1.58877
0	48600	IL1R1	hHR010512	126	51	379	158	227	73	0.332454	1	1	-1.58877
0	22762	GCNT1	hHC012642	281	51	845	491	417	235	0.332544	1	1	-1.58838
0	46243	CACNG6	hHC025908	322	66	967	663	379	220	0.332989	0	1	-1.58646
0	34307	C7orf23	hHC012465	236	50	708	516	206	180	0.333333	0	1	-1.58496
0	4911	GNAI3	hHC012650	112	50	336	263	79	60	0.333333	0	1	-1.58496
0	32110	PHF17	hHA034220	132	56	396	280	121	70	0.333333	0	1	-1.58496
0	18324	NOTCH2	hHC004289	513	51	1537	422	1131	460	0.333767	1	1	-1.58309
0	2810	CDH1	hHC012517	460	46	1378	126	1255	427	0.333817	1	1	-1.58287
0	5376	FZD1	hHR002558	202	44	605	112	497	157	0.333884	1	1	-1.58258
0	9407	EIF1AX	hHC030315	174	50	521	291	238	119	0.333973	1	1	-1.5822
0	22005	GOLGA8G	hHR030222	165	46	494	326	234	115	0.334008	1	1	-1.58205
0	14398	RP3-402G11.5	hHC020896	154	56	461	328	143	95	0.334056	0	1	-1.58184
0	14153	KIAA1958	hHR003028	147	51	440	235	212	95	0.334091	1	1	-1.58169
0	22740	DERPC	hHR027714	141	73	422	276	165	60	0.334123	1	1	-1.58155
0	26732	NUBP2	hHA039619	138	50	413	295	122	83	0.33414	0	1	-1.58147
0	19316	GREB1	hHC011081	130	56	389	133	262	57	0.33419	1	1	-1.58126
0	26762	BSG	hHC013795	126	50	377	301	89	73	0.334218	0	1	-1.58114
0	26420	UBE2F	hHA032707	202	51	604	453	156	152	0.334437	0	1	-1.58019
0	50321	FLJ90086	hHR019308	100	56	299	203	107	17	0.334448	0	1	-1.58015
0	25593	B3GNT7	hHR016591	97	50	290	252	45	14	0.334483	0	1	-1.58
0	31595	LOC284701	hHC031808	96	56	287	232	60	40	0.334495	0	1	-1.57994
0	9113	ZBTB33	hHC008907	280	51	837	343	512	235	0.334528	1	1	-1.5798
0	49309	DEK	hHC005028	809	54	2415	173	2249	772	0.33499	1	1	-1.57781
0	18281	LOC441000	hHR031061	305	53	910	440	487	248	0.335165	1	1	-1.57706
0	34149	LOC283755	hHR029841	168	50	501	313	204	113	0.335329	1	1	-1.57635
0	22508	CHUK	hHR008130	201	49	599	327	288	148	0.335559	1	1	-1.57536
0	29602	JOSD3	hHO047708	199	46	593	442	160	154	0.335582	0	1	-1.57526
0	9381	ZNF697	hHR011787	148	53	441	370	88	91	0.335601	0	1	-1.57518
0	40957	HMBS	hCP000298	220	56	655	167	497	113	0.335878	1	1	-1.57399
0	14250	FBXO41	hHR018016	87	56	259	241	23	7	0.335907	0	1	-1.57386
0	49708	KIAA0664	hHC021336	121	49	360	260	109	71	0.336111	0	1	-1.57299
0	30104	LOC347549	hHR032252	198	46	589	391	204	151	0.336163	1	1	-1.57277
0	14147	SPCS3	hHC002740	189	51	562	407	181	142	0.336299	0	1	-1.57218
0	33725	LOC92482	hHC002577	104	60	309	267	61	40	0.33657	0	1	-1.57102
0	47962	TNRC8	hHC012648	98	56	291	163	141	40	0.33677	1	1	-1.57017
0	34537	RIN3	hHC023121	223	49	662	397	271	175	0.336858	1	1	-1.56979
0	48337	GCC2	hHR028260	120	56	356	150	214	64	0.337079	1	1	-1.56884
0	19783	NUP88	hHA036605	246	57	729	380	364	192	0.337449	1	1	-1.56726
0	48820	SMARCA3	hHC006096	261	56	773	167	615	205	0.337646	1	1	-1.56642
0	48636	ANLN	hHC002256	226	60	667	160	516	161	0.338831	1	1	-1.56136
0	22544	VPS54	hHC015618	184	49	543	312	240	124	0.338858	1	1	-1.56125
0	25892	LOC439954	hHR027835	119	43	351	288	91	74	0.339031	0	1	-1.56051
0	31720	SMARCD2	hHC014732	98	53	289	176	133	41	0.3391	1	1	-1.56022
0	49679	FLJ36874	hHC001932	114	50	336	253	93	71	0.339286	0	1	-1.55943
0	40799	TBC1D17	hHA032386	110	51	324	152	177	22	0.339506	1	1	-1.55849
0	36019	RB1	hCT001473	107	64	315	143	175	25	0.339683	1	1	-1.55774
0	49284	LOC151162	hHC011856	141	54	415	181	243	86	0.339759	1	1	-1.55742
0	29916	HSD17B4	hHR005948	158	44	465	221	248	109	0.339785	1	1	-1.55731
0	41430	hCAP-D3	hHC004534	112	44	329	180	153	69	0.340426	1	1	-1.55459
0	29876	FLJ13305	hHR004412	270	51	793	436	368	218	0.340479	1	1	-1.55436
0	4242	LOC442385	hHR025814	78	46	229	185	56	30	0.340611	0	1	-1.5538
0	34801	SON	hHR027609	466	51	1368	433	945	416	0.340643	1	1	-1.55367
0	18367	YPEL5	hHR006005	304	54	892	456	449	249	0.340807	1	1	-1.55297
0	641	FLJ12716	hHC004681	76	46	223	173	55	27	0.340807	0	1	-1.55297
0	21011	C12orf48	hHC018606	82	46	240	138	108	31	0.341667	1	1	-1.54934
0	19266	LOC90110	hHC004073	257	63	752	500	254	193	0.341755	1	1	-1.54896
0	27814	PRMT3	hHC005803	135	59	395	263	154	68	0.341772	1	1	-1.54889
0	9785	FANCL	hHC002259	120	51	351	240	123	66	0.34188	0	1	-1.54844
0	30494	GAA	hHC025892	245	56	716	463	275	187	0.342179	1	1	-1.54718
0	37254	HMG2L1	hHC002997	77	47	225	198	40	29	0.342222	0	1	-1.54699
0	14018	SCC-112	hHR004192	420	53	1227	456	794	373	0.342298	1	1	-1.54667
0	22759	ME3	hHC012534	185	60	540	373	185	123	0.342593	0	1	-1.54543
0	21790	APP	hHC024474	293	46	855	332	544	253	0.34269	1	1	-1.54502
0	17133	KIAA0372	hHC002189	121	44	353	212	166	73	0.342776	1	1	-1.54466
0	50354	LOC392793	hHR030072	95	56	277	206	86	40	0.34296	0	1	-1.54389
0	21598	C17orf70	hHR017946	106	47	309	208	109	57	0.343042	0	1	-1.54354
0	18585	TNRC5	hHC023765	174	50	507	372	154	123	0.343195	0	1	-1.5429
0	12934	C1orf96	hHC002200	154	47	448	252	203	104	0.34375	1	1	-1.54057
0	26948	CBWD2	hHC031939	182	49	528	351	185	132	0.344697	1	1	-1.5366
0	22105	TGFBR2	hHC006486	644	53	1868	466	1420	591	0.344754	1	1	-1.53636
0	26832	CHORDC1	hHR029443	220	51	638	345	302	173	0.344828	1	1	-1.53605
0	26867	AK3L1	hHR030391	254	56	736	513	245	193	0.345109	0	1	-1.53488
0	49718	RP11-308B5.5	hHC004152	205	49	594	181	419	154	0.345118	1	1	-1.53484
0	10730	TRNM	hHR031335	256	47	741	120	626	207	0.345479	1	1	-1.53333
0	31198	BTBD10	hHC020900	338	56	978	437	566	280	0.345603	1	1	-1.53281
0	49359	FADS2	hHC018444	103	50	298	177	125	53	0.345638	1	1	-1.53267
0	22867	MGC22793	hHA039222	242	53	700	448	257	187	0.345714	1	1	-1.53235
0	14060	TRIM32	hHC010816	359	56	1038	437	606	303	0.345857	1	1	-1.53175
0	8700	MKI67	hHC010551	174	51	503	257	260	128	0.345924	1	1	-1.53147
0	30384	PTDSR	hHC011900	137	47	396	286	119	84	0.34596	0	1	-1.53132
0	22386	BCKDHB	hHC002274	279	51	806	378	419	225	0.346154	1	1	-1.53051
0	20730	FLJ20254	hHC017393	71	47	205	173	38	7	0.346341	0	1	-1.52973
0	50197	NOL8	hHC007980	114	54	329	228	126	59	0.346505	0	1	-1.52905
0	26158	TRIB2	hHC013339	173	50	499	413	121	119	0.346693	0	1	-1.52827
0	13216	CSE1L	hHA034552	315	50	908	406	501	263	0.346916	1	1	-1.52734
0	10116	LAMC2	hHA035007	166	51	478	363	123	119	0.34728	0	1	-1.52583
0	37926	CENPF	hHC002590	156	46	449	167	292	105	0.347439	1	1	-1.52517
0	26617	USP33	hHC004183	479	50	1378	321	1063	450	0.347605	1	1	-1.52448
0	8964	FAM54B	hHA040503	137	53	394	286	109	83	0.347716	0	1	-1.52402
0	18489	SHRM	hHC007253	464	50	1334	471	877	416	0.347826	1	1	-1.52356
0	3514	MYBL1	hHR003949	598	43	1719	147	1576	557	0.347877	1	1	-1.52335
0	4459	CD302	hHC003242	166	46	477	158	321	123	0.348008	1	1	-1.52281
0	21524	ZNFN1A1	hHE041274	195	53	560	250	412	147	0.348214	1	1	-1.52195
0	32287	PSEN2	hHC024320	116	56	333	278	65	55	0.348348	0	1	-1.5214
0	27550	HSPA4	hHA038059	239	56	686	262	443	184	0.348397	1	1	-1.5212
0	49560	SLC37A3	hHC009240	115	50	330	250	107	63	0.348485	0	1	-1.52083
0	31444	SLK	hHC007364	433	51	1242	458	822	379	0.348631	1	1	-1.52023
0	4236	HAX1	hHC028214	150	46	430	278	162	98	0.348837	1	1	-1.51937
0	49303	DDX11	hHR030084	162	56	464	168	304	105	0.349138	1	1	-1.51813
0	12636	FAM10A3	hHR028216	124	49	355	210	179	75	0.349296	1	1	-1.51748
0	12965	SAAL1	hHC004108	116	46	332	237	100	68	0.349398	0	1	-1.51706
0	9602	CTAGE3	hHR027615	171	50	489	235	262	113	0.349693	1	1	-1.51584
0	14098	CENPE	hHC014176	206	53	589	131	466	157	0.349745	1	1	-1.51562
0	6547	DEPDC1	hHC005690	111	50	317	121	202	57	0.350158	1	1	-1.51392
0	29936	ARTN	hHA036092	166	51	474	387	102	56	0.350211	0	1	-1.5137
0	26734	DIP2A	hHA039715	165	50	471	315	165	111	0.350318	0	1	-1.51326
0	26557	STEAP3	hHR012055	384	49	1096	315	788	345	0.350365	1	1	-1.51307
0	19598	LOC388237	hHR031913	292	56	833	471	377	238	0.35054	1	1	-1.51235
0	41069	CPT1B	hHC016042	66	43	188	175	16	20	0.351064	0	1	-1.51019
0	33654	ORC2L	hHC006429	105	56	299	353	92	47	0.351171	0	1	-1.50976
0	4592	BIRC4	hHR028790	104	46	296	192	108	58	0.351351	1	1	-1.50901
0	12626	SCP2	hHC016216	230	53	654	398	258	176	0.351682	1	1	-1.50766
0	46772	HPRT1	hCP000576	158	87	449	392	64	73	0.351893	0	1	-1.50679
0	38276	RECK	hHC004414	107	56	304	146	166	44	0.351974	1	1	-1.50646
0	45590	EXOC7	hHR012983	294	49	835	206	634	244	0.352096	1	1	-1.50596
0	642	GPBP1	hHC004693	118	44	335	190	149	72	0.352239	1	1	-1.50537
0	24095	CNIH3	hHC007422	223	56	633	253	400	163	0.352291	1	1	-1.50516
0	36804	C3orf23	hHC006357	202	46	573	190	390	154	0.352531	1	1	-1.50418
0	27635	HIVEP1	hHC002239	153	54	434	276	167	96	0.352535	1	1	-1.50416
0	11074	TLN1	hCT000615	61	49	173	110	66	4	0.352601	1	0	-1.50389
0	26570	LBR	hHC001507	955	53	2708	440	2270	893	0.352659	1	1	-1.50366
0	9301	M-RIP	hHA032523	83	46	235	195	69	4	0.353191	0	1	-1.50148
0	22353	ZNF265	hHC010710	164	47	464	297	201	114	0.353448	1	1	-1.50043
0	19842	TOMM20	hHR023273	267	60	755	405	352	206	0.353642	1	1	-1.49964
0	30487	YWHAE	hHC028280	196	53	554	366	196	141	0.353791	1	1	-1.49903
0	30932	ARPP-21	hHA039620	113	50	319	223	104	54	0.354232	0	1	-1.49723
0	10328	FKBP2	hHC025215	180	53	508	368	151	127	0.354331	0	1	-1.49683
0	33863	RASA1	hHC003441	549	53	1548	553	1006	478	0.354651	1	1	-1.49553
0	33825	LOC441296	hHR031185	132	46	372	253	124	81	0.354839	0	1	-1.49476
0	13076	SPRY4	hHC004408	291	50	820	458	364	241	0.354878	1	1	-1.4946
0	22685	ZNF585A	hHR007062	82	51	231	175	63	23	0.354978	0	1	-1.4942
0	14108	STK38	hHC008128	386	56	1087	468	655	334	0.355106	1	1	-1.49368
0	10389	LOC388931	hHR023187	201	50	566	411	179	147	0.355124	0	1	-1.49361
0	22321	CMKOR1	hHC018390	216	47	608	1033	305	177	0.355263	0	1	-1.49304
0	4412	FER1L3	hHC009398	210	46	591	236	363	165	0.35533	1	1	-1.49277
0	31896	DVL3	hHC016652	130	54	365	265	105	73	0.356164	0	1	-1.48938
0	42753	TXNL4A	hHC006611	213	51	598	431	190	149	0.356187	0	1	-1.48929
0	26579	FLJ23518	hHC001975	327	60	918	548	358	266	0.356209	1	1	-1.4892
0	12769	ORC4L	hHA032716	301	50	845	507	362	249	0.356213	1	1	-1.48919
0	8987	URB	hHC015147	103	56	289	235	61	48	0.356401	0	1	-1.48843
0	23461	RYBP	hHC003870	456	56	1279	618	766	400	0.356529	1	1	-1.48791
0	34097	WWC2	hHR002769	486	49	1363	298	1076	431	0.356566	1	1	-1.48776
0	30221	YIPF2	hHA039440	262	46	734	411	351	208	0.356948	1	1	-1.48621
0	25337	IARS	hHR014287	160	46	448	258	196	113	0.357143	1	1	-1.48543
0	23612	ZNF410	hHC013770	180	66	504	332	178	107	0.357143	1	1	-1.48543
0	34300	PPP2R3B	hHC032061	342	51	957	651	399	290	0.357367	0	1	-1.48452
0	10330	RAD1	hHR025311	193	53	540	353	197	136	0.357407	1	1	-1.48436
0	41788	CCDC69	hHC020566	94	56	263	203	62	40	0.357414	0	1	-1.48433
0	18553	FAM108A1	hHC032213	148	50	414	305	114	94	0.357488	0	1	-1.48403
0	21794	ZCSL3	hHC009690	157	46	439	328	139	113	0.357631	0	1	-1.48346
0	31259	CYCSL1	hHR028856	230	56	643	413	250	170	0.357698	1	1	-1.48318
0	34908	SUHW4	hHC003141	83	50	232	160	86	30	0.357759	0	1	-1.48294
0	27543	C9orf97	hHC005503	194	57	542	268	279	133	0.357934	1	1	-1.48224
0	47812	DYRK2	hHA040392	121	60	338	163	190	36	0.357988	1	1	-1.48202
0	33786	TBRG4	hHC020061	173	46	483	303	207	124	0.358178	1	1	-1.48125
0	19119	RAB3IL1	hHC014717	292	56	814	318	526	231	0.358722	1	1	-1.47906
0	29940	LOC391722	hHR025532	141	51	393	248	157	82	0.358779	1	1	-1.47883
0	4448	AXIN1	hHC005750	122	43	340	183	162	77	0.358824	1	1	-1.47865
0	23596	AKAP1	hHC015690	298	56	830	405	422	237	0.359036	1	1	-1.4778
0	42363	SSFA2	hHC004019	293	49	816	257	584	237	0.359069	1	1	-1.47767
0	26950	KRT6E	hHC032035	190	50	529	327	208	140	0.359168	1	1	-1.47727
0	31802	SLC30A6	hHC010604	152	53	423	278	171	91	0.359338	1	1	-1.47659
0	33566	HECA	hHC005300	78	44	217	183	41	32	0.359447	0	1	-1.47615
0	37891	LGALS9	hHC031666	81	46	225	223	33	30	0.36	0	1	-1.47393
0	29459	SRP19	hHC022832	245	50	680	473	220	191	0.360294	0	1	-1.47275
0	34058	CSNK1G3	hHC008157	293	47	813	373	452	239	0.360394	1	1	-1.47235
0	26015	WWP1	hHC029167	239	46	663	300	376	194	0.360483	1	1	-1.472
0	14653	SSBP4	hHR030100	296	51	821	513	313	243	0.360536	1	1	-1.47179
0	9203	LOC442340	hHR024747	172	54	477	388	97	119	0.360587	0	1	-1.47158
0	30601	LOC442058	hHR027608	330	96	914	587	334	214	0.36105	1	1	-1.46973
0	31837	KIAA0701	hHC011168	238	60	659	271	394	170	0.361153	1	1	-1.46932
0	4207	HPRT1	hCP000362	185	46	512	273	246	138	0.361328	1	1	-1.46862
0	23138	LOC441488	hHR028266	301	60	833	402	413	236	0.361345	1	1	-1.46855
0	9269	XRCC6	hHA033291	262	59	725	540	188	197	0.361379	0	1	-1.46841
0	30206	USP32	hHR024860	308	51	852	416	444	252	0.361502	1	1	-1.46792
0	30024	RABL2B	hHR030716	243	49	672	412	275	194	0.361607	1	1	-1.4675
0	22179	TRIB1	hHC003510	315	53	871	465	408	264	0.361653	1	1	-1.46732
0	9048	DSU	hHC004983	135	51	373	280	95	82	0.36193	0	1	-1.46622
0	22280	ANXA8	hHR031362	357	56	986	473	520	298	0.362069	1	1	-1.46566
0	41293	ZFYVE16	hHC011434	260	46	718	165	560	214	0.362117	1	1	-1.46547
0	30402	TCEA1	hHC030044	208	46	574	300	274	157	0.362369	1	1	-1.46447
0	602	EIF3S9	hHC018901	166	49	458	218	248	112	0.362445	1	1	-1.46416
0	700	PSMC1	hHC032053	189	47	521	285	259	144	0.362764	1	1	-1.4629
0	45514	POLK	hHC003959	106	46	292	160	136	58	0.363014	1	1	-1.4619
0	41484	DNM1L	hHA035926	114	46	314	176	142	67	0.363057	1	1	-1.46173
0	30236	DPAGT1	hHC020540	179	51	493	363	145	122	0.363083	0	1	-1.46163
0	26599	PPFIBP1	hHA033655	320	51	881	433	441	272	0.363224	1	1	-1.46107
0	43532	TMTC1	hHA039623	105	54	289	133	161	9	0.363322	1	1	-1.46068
0	26962	PCOLCE2	hHC012643	244	50	671	408	258	200	0.363636	1	1	-1.45943
0	18289	ANKRD52	hHC013013	196	47	539	438	122	146	0.363636	0	1	-1.45943
0	3477	SLC45A3	hHR017185	72	43	198	141	58	24	0.363636	0	1	-1.45943
0	22845	ADNP	hHC009750	309	51	849	312	563	253	0.363958	1	1	-1.45816
0	34219	MAT2A	hHR030513	719	57	1975	640	1352	666	0.364051	1	1	-1.45779
0	4245	FLT3LG	hHC025994	75	46	206	173	38	27	0.364078	0	1	-1.45768
0	14660	OGT	hHC005056	485	56	1331	451	901	421	0.364388	1	1	-1.45645
0	4567	ZNF281	hHC004202	121	44	332	185	152	76	0.364458	1	1	-1.45618
0	4837	MCM6	hHC007178	112	46	307	137	174	68	0.364821	1	1	-1.45474
0	31070	CTGLF2	hHR030500	289	56	792	348	457	231	0.364899	1	1	-1.45443
0	1298	BUB1	hHC005725	657	46	1800	123	1682	621	0.365	1	1	-1.45403
0	9195	PGM2L1	hHC009771	192	51	526	312	221	139	0.365019	1	1	-1.45396
0	18002	PAM	hHC027617	180	47	493	360	150	136	0.365112	0	1	-1.45359
0	44465	PCAF	hHC004067	149	56	408	156	258	88	0.365196	1	1	-1.45326
0	41609	DFFB	hHC010090	72	46	197	183	16	4	0.365482	0	1	-1.45213
0	14242	FOXJ2	hHC015328	248	56	678	368	331	191	0.365782	1	1	-1.45095
0	38011	GALNT1	hHR009394	71	46	194	166	44	24	0.365979	0	1	-1.45017
0	27816	HARSL	hHC005899	380	63	1038	458	596	310	0.366089	1	1	-1.44974
0	31002	SVH	hHC029924	268	51	732	448	294	219	0.36612	1	1	-1.44961
0	31243	DHX38	hHC009656	344	53	939	462	491	286	0.366347	1	1	-1.44872
0	10261	ZNF91	hHR028947	506	51	1381	551	901	452	0.366401	1	1	-1.4485
0	21258	KIAA1199	hHC003162	966	46	2635	141	2505	921	0.366603	1	1	-1.44771
0	23353	ERCC1	hHA038238	238	59	649	425	221	178	0.366718	1	1	-1.44726
0	26997	ASB13	hHC020887	271	51	738	351	365	216	0.367209	1	1	-1.44533
0	9246	DPH5	hHC007959	126	69	343	268	80	54	0.367347	0	1	-1.44478
0	22275	GCSH	hHC031158	158	50	430	326	113	101	0.367442	0	1	-1.44441
0	31256	ZNF593	hHC024836	199	54	541	331	224	139	0.367837	1	1	-1.44286
0	25240	CALM2	hHR028411	103	49	280	258	37	48	0.367857	0	1	-1.44278
0	8691	CD99L2	hHA037035	78	47	212	148	75	29	0.367925	0	1	-1.44252
0	9635	TNS1	hHC020019	131	47	356	235	123	13	0.367978	1	1	-1.44231
0	18156	EHD4	hHC011969	229	51	622	380	252	173	0.368167	1	1	-1.44157
0	25645	C6orf115	hHC014095	299	50	812	560	252	243	0.368227	0	1	-1.44133
0	18222	GRM4	hHC026657	178	56	483	356	141	117	0.36853	0	1	-1.44015
0	22010	VPS4B	hHC005082	286	50	775	331	457	236	0.369032	1	1	-1.43818
0	19201	RBM27	hHR010589	552	63	1495	693	817	490	0.369231	1	1	-1.43741
0	22814	SEC24A	hHR001698	185	50	501	295	229	129	0.369261	1	1	-1.43729
0	26468	MARCKS	hHC014659	178	49	482	318	179	130	0.369295	1	1	-1.43716
0	4422	FBXO46	hHR014870	82	46	222	167	61	35	0.369369	0	1	-1.43686
0	17098	STX12	hHC010457	143	50	387	263	135	100	0.369509	0	1	-1.43632
0	30035	CD2AP	hHC007088	153	43	414	202	214	118	0.369565	1	1	-1.4361
0	26830	LOC441371	hHR029347	203	51	549	363	203	148	0.369763	1	1	-1.43533
0	31311	RAB10	hHA034040	196	50	530	303	259	140	0.369811	1	1	-1.43514
0	40546	ZCCHC11	hHC004846	309	51	835	152	687	262	0.37006	1	1	-1.43417
0	7473	BUB1B	hHC002402	272	46	735	123	615	224	0.370068	1	1	-1.43414
0	36899	SOCS5	hHC027465	141	46	381	206	180	103	0.370079	1	1	-1.4341
0	19240	LSS	hHR011273	680	63	1837	468	1359	618	0.370169	1	1	-1.43374
0	18179	TIMP3	hHR001973	2408	63	6505	598	5902	2428	0.370177	1	1	-1.43371
0	12829	C1orf37	hHR031372	261	50	705	580	230	216	0.370213	0	1	-1.43357
0	10119	ALG5	hHA035187	204	54	551	333	229	152	0.370236	1	1	-1.43348
0	27189	SNX15	hHC023191	227	49	613	346	277	172	0.37031	1	1	-1.43319
0	21694	DENR	hHC027930	156	46	421	263	161	110	0.370546	1	1	-1.43227
0	13222	FKBP9L	hHR030616	458	53	1235	483	762	407	0.37085	1	1	-1.43109
0	126	NUP155	hHC002581	112	66	302	227	94	47	0.370861	0	1	-1.43105
0	18107	MTRR	hHC003125	266	54	716	440	291	210	0.371508	1	1	-1.42853
0	49160	CSE1L	hHA033936	113	50	304	163	149	60	0.371711	1	1	-1.42775
0	3301	ZNF486	hHC027553	74	41	199	151	51	33	0.371859	0	1	-1.42717
0	37227	PHLDB2	hHR004425	440	46	1183	200	990	398	0.371936	1	1	-1.42687
0	21816	NDUFA9	hHC029178	96	50	258	225	43	39	0.372093	0	1	-1.42626
0	8426	RPS6KA3	hHC016215	118	49	317	188	140	62	0.37224	1	1	-1.4257
0	32109	SEC22L2	hHA034208	149	56	400	297	113	90	0.3725	0	1	-1.42469
0	30410	CDC42BPB	hHR005084	440	51	1181	460	716	390	0.372566	1	1	-1.42443
0	19715	OXR1	hHC029117	364	56	977	472	514	310	0.372569	1	1	-1.42442
0	30675	LOC343717	hHR031160	600	53	1610	503	1122	547	0.372671	1	1	-1.42403
0	46334	UBE2E1	hHC003744	302	70	810	643	310	223	0.37284	0	1	-1.42337
0	21461	CRIM1	hHC008334	242	46	649	331	329	193	0.372881	1	1	-1.42321
0	32609	NCSTN	hHC022760	110	46	295	212	92	63	0.372881	0	1	-1.42321
0	21970	SNX11	hHC019290	91	47	244	221	29	42	0.372951	0	1	-1.42294
0	49460	STOM	hHA039000	94	59	252	218	51	7	0.373016	0	1	-1.42269
0	21262	ATAD2	hHC003354	106	46	284	131	159	60	0.373239	1	1	-1.42183
0	29484	CYB5R1	hHC022076	221	49	592	323	306	167	0.373311	1	1	-1.42155
0	12181	DKFZP761M1511	hHR008739	171	49	458	118	345	120	0.373362	1	1	-1.42135
0	23026	KIAA0859	hHC019554	205	50	549	251	312	153	0.373406	1	1	-1.42118
0	30537	PFKFB3	hHC022232	304	60	814	415	393	251	0.373464	1	1	-1.42096
0	17017	MTIF2	hHR014669	133	50	356	258	113	83	0.373596	0	1	-1.42045
0	19603	LOC388161	hHR032189	173	56	463	308	168	114	0.37365	1	1	-1.42024
0	14215	MKKS	hHA040564	104	53	278	257	52	48	0.374101	0	1	-1.4185
0	19533	CCDC34	hHR006941	362	56	966	628	381	310	0.374741	1	1	-1.41603
0	29911	CRELD2	hHC013808	114	41	304	186	128	72	0.375	1	1	-1.41504
0	25846	IFT81	hHC004891	150	46	400	342	155	97	0.375	0	1	-1.41504
0	34596	HIRIP5	hHC007485	219	56	584	452	161	154	0.375	0	1	-1.41504
0	25784	NOL11	hHR029563	191	46	509	270	247	144	0.375246	1	1	-1.41409
[truncated: 10,525 more rows]
