# Supplementary material for: Suppression of cell migration is promoted by miR-944 through targeting of SIAH1 and PTP4A1 in breast cancer cells
Source: Springer Nature journal article supplement (doi:10.1186/s12885-016-2470-3), 2016-07-04
Supplement: MOESM1 [file 10333100]

| Name         | Sequence 5'-3'                                                          | Target región                          |
|--------------|-------------------------------------------------------------------------|----------------------------------------|
| Sh-SIAH1.1S  | GATCCGCTATGGAGAAAGTGGCTAATTTCAAGAGAAT<br>TAGCCACTTTCTCCATAGCTTTTTTGGAAA | 373-394<br>GCTATGGAGAAAGTGGCT<br>AAT   |
| Sh-SIAH1.1AS | AGCTTTTCCAAAAAAGCTATGGAGAAAGTGGCTAATT<br>CTCTTGAAATTAGCCACTTTCTCCATAGCG |                                        |
| Sh-SIAH1.2S  | GATCCGCTAGACACATGAAGGTAAATTC AAGAGATTT<br>ACCTTCATGTGTCTAGCTTTTTTGGAAA  | 1069-1090<br>GCTAGACACATGAAGGTA<br>AAT |
| Sh-SIAH1.2AS | AGCTTTTCCAAAAAAGCTAGACACATGAAGGTAAATC<br>TCTTGAATTTACCTTCATGTGTCTAGCG   |                                        |

Additional file 1. Oligonucleotides sequences used to silencing SIAH1 gene expression
