# Supplementary material for: Suppression of cell migration is promoted by miR-944 through targeting of SIAH1 and PTP4A1 in breast cancer cells
Source: Springer Nature journal article supplement (doi:10.1186/s12885-016-2470-3), 2016-07-04

Additional file 2. miR-944 vs miR-204 and miR-944 vs miR-10b expression in TGCA validation cohort.

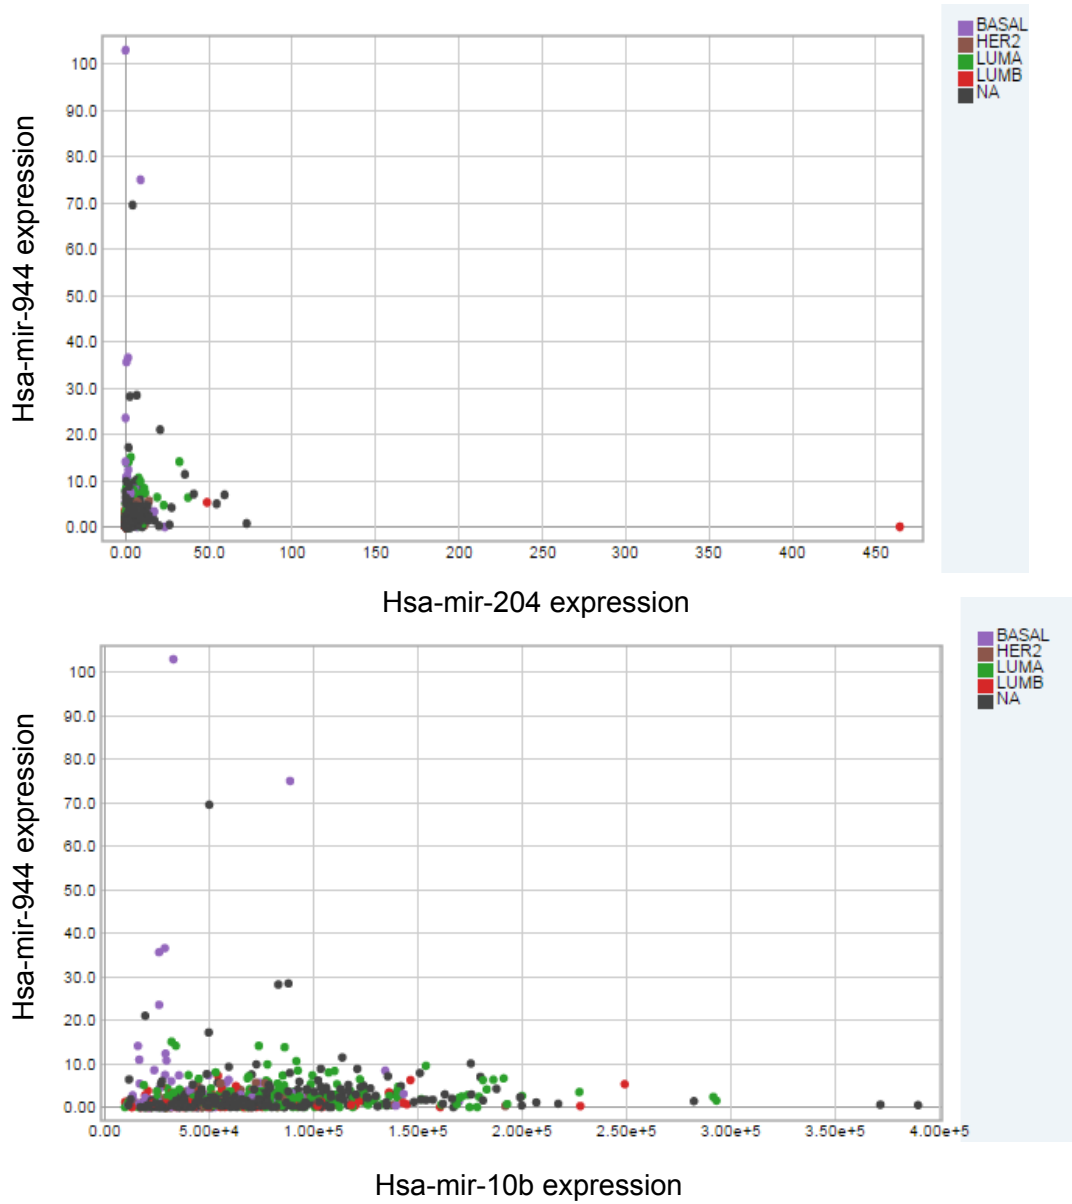

Supplement: MOESM2 [file 10333100]
